# Supplementary material for: Patient-reported outcome instruments used in immune-checkpoint inhibitor clinical trials in oncology: a systematic review
Source: PubMed Central journal article supplement (PMC7364679; doi:10.1186/s41687-020-00210-z), 2020-07-16
Supplement: 41687_2020_210_MOESM1_ESM.pdf [file 41687_2020_210_MOESM1_ESM.pdf]

**Patient reported outcome instruments used in immune checkpoint inhibitor  
clinical trials in oncology: a systematic review**

Sara Colomer-Lahiguera, Denise Bryant-Lukosius, Sarah Rietkoetter, Lorraine Martelli, Karin Ribi,  
Donna Fitzpatrick-Lewis, Diana Sherifali, Angela Orcurto, Rosalyn Juergens, Manuela Eicher.

**Supplementary information**

Table S1: List with the search terms

Table S2: List with the inclusion / exclusion criteria

Table S3: Data extraction

Figure S1: ICI-CT registered in clinicaltrials.gov (2004-2019)

Table S4: List of identified clinical trials stating the use of PROs

Table S5: *Cochrane checklist for describing and assessing PROs in CTs*

Table S6: PRO instruments completion rates

Table S7: Symptom-related content of PRO instruments

Table S8: AEs reported in selected ICI-CT

Table S9: AEs differentiated into multi-symptom

References

**Table S1: List with the search terms**

|                  | PROs terms                                                                                                                                                                                                                                                                                                                                                                                                                                                                                                                                                                                                                                                                                                                                                                                                                                                                               | Oncology & Immunotherapy terms                                                                                                                                    | Checkpoint Inhibitor terms                                                                                                                                                                                                                                                                                                                                                                                                                                                                                                                                                                                                                                                                                                                                                                                                                                                                                                                          |
|------------------|------------------------------------------------------------------------------------------------------------------------------------------------------------------------------------------------------------------------------------------------------------------------------------------------------------------------------------------------------------------------------------------------------------------------------------------------------------------------------------------------------------------------------------------------------------------------------------------------------------------------------------------------------------------------------------------------------------------------------------------------------------------------------------------------------------------------------------------------------------------------------------------|-------------------------------------------------------------------------------------------------------------------------------------------------------------------|-----------------------------------------------------------------------------------------------------------------------------------------------------------------------------------------------------------------------------------------------------------------------------------------------------------------------------------------------------------------------------------------------------------------------------------------------------------------------------------------------------------------------------------------------------------------------------------------------------------------------------------------------------------------------------------------------------------------------------------------------------------------------------------------------------------------------------------------------------------------------------------------------------------------------------------------------------|
| MEDLINE & PubMed | <p>exp Patient Reported Outcome Measures/<br/>patient reported outcome*.mp.<br/>self report.mp. or exp Self Report/<br/>"PROM".mp.<br/>"PROMs".mp.<br/>"PROs".mp.<br/>(patient report* adj2 (outcome or measure or assessment or questionnaire or instrument or index or indice* or indicator*)),ti,ab.<br/>(patient derived adj2 (outcome or measure or assessment or questionnaire or instrument or index or indice* or indicator*)),ti,ab.<br/>(patient rated adj2 (outcome or measure or assessment or questionnaire or instrument or index or indice* or indicator*)),ti,ab.<br/>(patient based adj2 (outcome or measure or assessment or questionnaire or instrument or index or indice* or indicator*)),ti,ab.<br/>quality of life.mp. or exp "Quality of Life"/<br/>life quality.mp.<br/>QOL.mp.<br/>HRQOL.mp.<br/>HR-QOL.mp.<br/>HRQL.mp.<br/>QL.mp.<br/>health utilit*.mp.</p> | <p>exp Immunotherapy/<br/>immunotherap*.mp.<br/>exp Neoplasms/<br/>neoplasm*.mp.<br/>cancer*.mp.<br/>oncolog*.mp.<br/>(tumor or tumour).mp.<br/>malignan*.mp.</p> | <p>exp CTLA-4 Antigen/<br/>CTLA*.mp.<br/>exp T-Lymphocytes, Cytotoxic/<br/>(CD152 or CD 152).mp.<br/>ipilimumab.mp.<br/>yervoy.mp.<br/>("MDX 010" or MDX010).mp.<br/>exp Programmed Cell Death 1 Receptor/<br/>programmed cell death.mp.<br/>(PD1 or PD 1).mp.<br/>(CD279 or CD 279).mp.<br/>nivolumab.mp.<br/>(MDX1106 or MDX 1106).mp.<br/>(ono4538 or ono 4538).mp.<br/>(BMS936558 or BMS 936558).mp.<br/>opdivo.mp.<br/>pembrolizumab.mp.<br/>lambrolizumab.mp.<br/>keytruda.mp.<br/>(MK3475 or MK 3475).mp.<br/>programmed death.mp.<br/>(PDL1 or PDL 1).mp.<br/>exp Antigens, CD274/<br/>(CD274 or CD 274).mp.<br/>Atezolizumab.mp.<br/>(MPDL3280A or MPDL 3280A).mp.<br/>tecentriq.mp.<br/>(RG7446 or RG 7446).mp.<br/>Avelumab.mp.<br/>(MSB0010718C or MSB 0010718C).mp.<br/>Durvalumab.mp.<br/>bavencio.mp.<br/>imfinzi.mp.<br/>checkpoint blockade.mp.<br/>checkpoint inhibitor.mp.<br/>immune checkpoint.mp.<br/>immune blockade.mp.</p> |

|        | PROs terms                                                                                                                                                                                                                                                                                                                                                                                                                                                                                                                                                                                                                                                                                                                                                                                                                                                                                                                                                                                                                                                                                                                                                                                                                                                                                                                                                                                                                                                                       | Oncology & Immunotherapy terms                                                                                                                                                                                                                                                                                             | Checkpoint Inhibitor terms                                                                                                                                                                                                                                                                                                                                                                                                                                                                                                                                                                                                                                                                                                                                                                                                                                                                                                                                                                                                                                                                                                                                                                                                                                                                                                                                                                                                                                                                                                                                                                                                                                                                                                    |
|--------|----------------------------------------------------------------------------------------------------------------------------------------------------------------------------------------------------------------------------------------------------------------------------------------------------------------------------------------------------------------------------------------------------------------------------------------------------------------------------------------------------------------------------------------------------------------------------------------------------------------------------------------------------------------------------------------------------------------------------------------------------------------------------------------------------------------------------------------------------------------------------------------------------------------------------------------------------------------------------------------------------------------------------------------------------------------------------------------------------------------------------------------------------------------------------------------------------------------------------------------------------------------------------------------------------------------------------------------------------------------------------------------------------------------------------------------------------------------------------------|----------------------------------------------------------------------------------------------------------------------------------------------------------------------------------------------------------------------------------------------------------------------------------------------------------------------------|-------------------------------------------------------------------------------------------------------------------------------------------------------------------------------------------------------------------------------------------------------------------------------------------------------------------------------------------------------------------------------------------------------------------------------------------------------------------------------------------------------------------------------------------------------------------------------------------------------------------------------------------------------------------------------------------------------------------------------------------------------------------------------------------------------------------------------------------------------------------------------------------------------------------------------------------------------------------------------------------------------------------------------------------------------------------------------------------------------------------------------------------------------------------------------------------------------------------------------------------------------------------------------------------------------------------------------------------------------------------------------------------------------------------------------------------------------------------------------------------------------------------------------------------------------------------------------------------------------------------------------------------------------------------------------------------------------------------------------|
| EMBASE | <p>patient reported outcome*.mp.<br/>                     PROMs.mp.<br/>                     PROM.mp.<br/>                     health related quality of life.mp.<br/>                     life quality.mp.<br/>                     QOL.mp.<br/>                     HRQOL.mp.<br/>                     QL.mp.<br/>                     HRQL.mp.<br/>                     HR-QOL.mp.<br/>                     health utilit*.mp.<br/>                     exp patient-reported outcome/<br/>                     quality of life.mp. or exp "quality of life"/<br/>                     self report.mp. or exp self report/<br/>                     (patient report* adj2 (outcome or measure or assessment or<br/>                     questionnaire or instrument or index or indice* or<br/>                     indicator*)),ti,ab.<br/>                     (patient derived adj2 (outcome or measure or assessment or<br/>                     questionnaire or instrument or index or indice* or<br/>                     indicator*)),ti,ab.<br/>                     (patient rated adj2 (outcome or measure or assessment or<br/>                     questionnaire or instrument or index or indice* or<br/>                     indicator*)),ti,ab.<br/>                     (patient based adj2 (outcome or measure or assessment or<br/>                     questionnaire or instrument or index or indice* or<br/>                     indicator*)),ti,ab.</p> | <p>exp immunotherapy/ or exp cancer immunotherapy/<br/>                     immunotherap*.mp.<br/>                     exp neoplasm/ or neoplasm*.mp.<br/>                     cancer*.mp.<br/>                     oncolog*.mp.<br/>                     (tumor or tumour).mp.<br/>                     malignan*.mp.</p> | <p>exp cytotoxic T lymphocyte antigen 4/ or ctla*.mp.<br/>                     exp cytotoxic T lymphocyte/<br/>                     CD152 CD 152.mp.<br/>                     ipilimumab.mp.<br/>                     yervoy.mp.<br/>                     ("MDX 010" or MDX010).mp.<br/>                     programmed cell death.mp. or exp apoptosis/<br/>                     (PD1 or PD 1).mp.<br/>                     (CD279 or CD 279).mp.<br/>                     nivolumab.mp.<br/>                     (MDX1106 or MDX 1106).mp.<br/>                     ono4538 ono 4538.mp.<br/>                     (BMS936558 or BMS 936558).mp.<br/>                     opdivo.mp.<br/>                     pembrolizumab.mp.<br/>                     lambrolizumab.mp.<br/>                     keytruda.mp.<br/>                     (MK3475 or MK 3475).mp.<br/>                     exp programmed death 1 ligand 1/ or programmed death.mp.<br/>                     or exp programmed death 1 receptor/<br/>                     (PDL1 or PDL 1).mp.<br/>                     (CD274 or CD 274).mp.<br/>                     Atezolizumab.mp.<br/>                     (MPDL3280A or MPDL 3280A).mp.<br/>                     tecentriq.mp.<br/>                     (RG7446 or RG 7446).mp.<br/>                     avelumab.mp.<br/>                     (MSB0010718C or MSB 0010718C).mp.<br/>                     durvalumab.mp.<br/>                     bavencio.mp.<br/>                     imfinzi.mp.<br/>                     checkpoint blockade.mp.<br/>                     checkpoint inhibitor.mp.<br/>                     immune checkpoint.mp.<br/>                     immune blockade.mp.</p> |

|        | PROs terms                                                                                                                                                                                                                                                                                                                                                                                                                                                                                                                                                                                                                                                                                                                                                                                                                                                                                                                                                                                                                                                                                                                                                                                                                                                                                                                                                                                                                                                                                                                                                                                                                                                                                                                                                | Oncology & Immunotherapy terms                                                                                                                                                                                                                                                                                                       | Checkpoint Inhibitor terms                                                                                                                                                                                                                                                                                                                                                                                                                                                                                                                                                                                                                                                                                                                                                                                                                                                                                                                                                                                                                                                                                                                                                                                                                                                                                        |
|--------|-----------------------------------------------------------------------------------------------------------------------------------------------------------------------------------------------------------------------------------------------------------------------------------------------------------------------------------------------------------------------------------------------------------------------------------------------------------------------------------------------------------------------------------------------------------------------------------------------------------------------------------------------------------------------------------------------------------------------------------------------------------------------------------------------------------------------------------------------------------------------------------------------------------------------------------------------------------------------------------------------------------------------------------------------------------------------------------------------------------------------------------------------------------------------------------------------------------------------------------------------------------------------------------------------------------------------------------------------------------------------------------------------------------------------------------------------------------------------------------------------------------------------------------------------------------------------------------------------------------------------------------------------------------------------------------------------------------------------------------------------------------|--------------------------------------------------------------------------------------------------------------------------------------------------------------------------------------------------------------------------------------------------------------------------------------------------------------------------------------|-------------------------------------------------------------------------------------------------------------------------------------------------------------------------------------------------------------------------------------------------------------------------------------------------------------------------------------------------------------------------------------------------------------------------------------------------------------------------------------------------------------------------------------------------------------------------------------------------------------------------------------------------------------------------------------------------------------------------------------------------------------------------------------------------------------------------------------------------------------------------------------------------------------------------------------------------------------------------------------------------------------------------------------------------------------------------------------------------------------------------------------------------------------------------------------------------------------------------------------------------------------------------------------------------------------------|
| CINAHL | <p>(MH "Patient-Reported Outcomes+")<br/>                     "patient reported outcome*"<br/>                     (MH "Self Report+") OR "self report"<br/>                     "PROM"<br/>                     "PROMs"<br/>                     TI patient report* N2 (outcome or measure or assessment or questionnaire or instrument or index or indice* or indicator*<br/>                     AB patient report* N2 (outcome or measure or assessment or questionnaire or instrument or index or indice* or indicator*<br/>                     TI patient derived N2 (outcome or measure or assessment or questionnaire or instrument or index or indice* or indicator*<br/>                     AB patient derived N2 (outcome or measure or assessment or questionnaire or instrument or index or indice* or indicator*<br/>                     TI patient rated N2 (outcome or measure or assessment or questionnaire or instrument or index or indice* or indicator*<br/>                     AB patient rated N2 (outcome or measure or assessment or questionnaire or instrument or index or indice* or indicator*<br/>                     TI patient based N2 (outcome or measure or assessment or questionnaire or instrument or index or indice* or indicator*<br/>                     AB patient based N2 (outcome or measure or assessment or questionnaire or instrument or index or indice* or indicator*<br/>                     (MH "Quality of Life") OR "quality of life"<br/>                     "life quality"<br/>                     "QOL"<br/>                     "HRQOL"<br/>                     "HR-QOL"<br/>                     "HRQL"<br/>                     QL<br/>                     "health utilit*"</p> | <p>(MH "Immunotherapy+")<br/>                     "immunotherap*"<br/>                     (MH "Neoplasms+")<br/>                     "neoplasm*"<br/>                     "cancer*"<br/>                     "oncolog*"<br/>                     "tumor"<br/>                     "tumour"<br/>                     "malignan*"</p> | <p>"CTLA*"<br/>                     (MH "T Lymphocytes")<br/>                     "CD152"<br/>                     "ipilimumab"<br/>                     "yervoy"<br/>                     "MDX 010"<br/>                     "programmed cell death"<br/>                     "PD1"<br/>                     "CD279"<br/>                     "nivolumab"<br/>                     "MD1106"<br/>                     "ono4538"<br/>                     BMS936558"<br/>                     "opdivo"<br/>                     "pembrolizumab"<br/>                     "lambrolizumab"<br/>                     "keytruda"<br/>                     "MK3475"<br/>                     "programmed death"<br/>                     "PDL1"<br/>                     "CD274"<br/>                     "atezolizumab"<br/>                     "MPDL3280A"<br/>                     "tecentriq"<br/>                     "RG7446"<br/>                     "avelumab"<br/>                     "MSB0010718C"<br/>                     "durvalumab"<br/>                     "bavencio"<br/>                     "imfinzi"<br/>                     "checkpoint blockade"<br/>                     "checkpoint inhibitor"<br/>                     "immune checkpoint"<br/>                     "immune blockade"</p> |

|          | PROs terms                                                                                                                                                                                                                                                                                                                                                                                                                                                                                                                                                                                                                                                                                                                                                                                                                                                                                                                                                                                                                                                                                                                                                                  | Oncology & Immunotherapy terms                                                                                                                                                                                                                                                                                       | Checkpoint Inhibitor terms                                                                                                                                                                                                                                                                                                                                                                                                                                                                                                                                                                                                                                                                                                                                                                                                                                                                                                                                                                                                                                                                                                                                                                                                                                                                                                                                                                                                                                                                                            |
|----------|-----------------------------------------------------------------------------------------------------------------------------------------------------------------------------------------------------------------------------------------------------------------------------------------------------------------------------------------------------------------------------------------------------------------------------------------------------------------------------------------------------------------------------------------------------------------------------------------------------------------------------------------------------------------------------------------------------------------------------------------------------------------------------------------------------------------------------------------------------------------------------------------------------------------------------------------------------------------------------------------------------------------------------------------------------------------------------------------------------------------------------------------------------------------------------|----------------------------------------------------------------------------------------------------------------------------------------------------------------------------------------------------------------------------------------------------------------------------------------------------------------------|-----------------------------------------------------------------------------------------------------------------------------------------------------------------------------------------------------------------------------------------------------------------------------------------------------------------------------------------------------------------------------------------------------------------------------------------------------------------------------------------------------------------------------------------------------------------------------------------------------------------------------------------------------------------------------------------------------------------------------------------------------------------------------------------------------------------------------------------------------------------------------------------------------------------------------------------------------------------------------------------------------------------------------------------------------------------------------------------------------------------------------------------------------------------------------------------------------------------------------------------------------------------------------------------------------------------------------------------------------------------------------------------------------------------------------------------------------------------------------------------------------------------------|
| PsycINFO | <p>Exp Self-Report/<br/>                     Patient reported outcome*.mp.<br/>                     Self report.mp.<br/>                     PROM.mp.<br/>                     PROMs.mp.<br/>                     (patient report* adj2 (outcome or measure or assessment or questionnaire or instrument or index or indice* or indicator*)),ti,ab.<br/>                     (patient derived adj2 (outcome or measure or assessment or questionnaire or instrument or index or indice* or indicator*)),ti,ab.<br/>                     (patient rated adj2 (outcome or measure or assessment or questionnaire or instrument or index or indice* or indicator*)),ti,ab.<br/>                     (patient based adj2 (outcome or measure or assessment or questionnaire or instrument or index or indice* or indicator*)),ti,ab.<br/>                     Quality of life.mp. or exp "Quality of Life"/<br/>                     Life quality.mp.<br/>                     QOL.mp.<br/>                     HRQOL.mp.<br/>                     HR-QOL.mp.<br/>                     HRQL.mp.<br/>                     QL.mp.<br/>                     Health utilit*.mp.</p> | <p>Exp Immunotherapy/<br/>                     Immunotherap*.mp.<br/>                     Exp Neoplasms/<br/>                     Neoplasm*.mp.<br/>                     Cancer*.mp.<br/>                     Oncolog*.mp.<br/>                     (tumor or tumour).mp.<br/>                     Malignan*.mp.</p> | <p>CTLA*.mp.<br/>                     (CD152 or CD 152).mp.<br/>                     Ipilimumab.mp.<br/>                     Yervoy.mp.<br/>                     (*MDX 010 or MDX010).mp.<br/>                     Programmed cell death.mp.<br/>                     (PD1 or PD 1).mp.<br/>                     (CD279 or CD 279).mp.<br/>                     Nivolumab.mp.<br/>                     (MDX1106 or MDX 1106).mp.<br/>                     (ono4538 or ono 4538).mp.<br/>                     (BMS936558 or BMS 936558).mp.<br/>                     Opdivo.mp.<br/>                     Pembrolizumab.mp.<br/>                     Lambrolizumab.mp.<br/>                     Keytruda.mp.<br/>                     (MK3475 or MK 3475).mp.<br/>                     Programmed death.mp.<br/>                     (PDL1 or PDL 1).mp.<br/>                     (CD274 or CD 274).mp.<br/>                     Atezolizumab.mp.<br/>                     (MPDL3280A or MPDL 3280A).mp.<br/>                     Tecentriq.mp.<br/>                     (RG7446 or RG 7446).mp.<br/>                     Avelumab.mp.<br/>                     (MSB0010718C or MSB 0010718C).mp.<br/>                     Durvalumab.mp.<br/>                     Bavencio.mp.<br/>                     Imfinzi.mp.<br/>                     Checkpoint blockade.mp.<br/>                     Checkpoint inhibitor.mp.<br/>                     Immune checkpoint.mp.<br/>                     Immune blockade.mp.</p> |

**Table S2: List with the inclusion / exclusion criteria**

|                                                                                                                                                                                                                                                                                                                                                                                                                                                                                                                                                                                                                                                                                                                                                                                                                                                                                                                                                                                                                                                                                                                                                                                                                            |
|----------------------------------------------------------------------------------------------------------------------------------------------------------------------------------------------------------------------------------------------------------------------------------------------------------------------------------------------------------------------------------------------------------------------------------------------------------------------------------------------------------------------------------------------------------------------------------------------------------------------------------------------------------------------------------------------------------------------------------------------------------------------------------------------------------------------------------------------------------------------------------------------------------------------------------------------------------------------------------------------------------------------------------------------------------------------------------------------------------------------------------------------------------------------------------------------------------------------------|
| <p><b>Inclusion criteria:</b></p> <ul style="list-style-type: none"> <li>• Clinical trials, intervention studies, study protocols, and conference abstracts from intervention studies</li> <li>• Studies involving patients receiving treatment for cancer</li> <li>• Investigating FDA approved immune checkpoint inhibitors (Ipilimumab, Nivolumab, Pembrolizumab/Lambrolizumab, Atezolizumab, Avelumab, Durvalumab)</li> <li>• Use of patient reported outcome (PRO) instruments</li> </ul>                                                                                                                                                                                                                                                                                                                                                                                                                                                                                                                                                                                                                                                                                                                             |
| <p><b>Exclusion criteria:</b></p> <ul style="list-style-type: none"> <li>• Articles that do not report on empirical/interventional studies (including discussion papers, commentaries, editorials, opinion papers, clinical practice guidelines, systematic reviews of the literature, QALY/cost-effectiveness studies)</li> <li>• Articles reporting follow-up results from clinical trials or subgroup analyses of main clinical trials</li> <li>• Studies evaluating ICI therapies for patients with conditions or diseases other than cancer (e.g. autoimmune: rheumatoid arthritis, Parkinson disease...)</li> <li>• Investigating other cancer immunotherapies that are not immune checkpoint inhibitors:             <ul style="list-style-type: none"> <li>• vaccines</li> <li>• adoptive therapy: CAR-T cells/Tumor infiltrating lymphocytes TILs/cytotoxic T cells CTL</li> <li>• other monoclonal antibodies</li> <li>• targeted therapy</li> <li>• oncolytic viruses</li> <li>• CTLA4-Ig, Abatacept or Belatacept</li> </ul> </li> <li>• Articles referring to clinician reported performance status (ECOG, Karnofsky, etc...) or other instruments that are not completed or reported by patients.</li> </ul> |
| <p><b>Special considerations</b></p> <ul style="list-style-type: none"> <li>• Conference abstracts and study protocols will be reviewed separately in order to identify further published or unpublished studies matching the inclusion criteria.</li> <li>• Articles containing “Quality of life” (QoL) in the abstract as background information and not as an outcome of the study will be excluded.</li> <li>• Articles involving PROs will be included as long as one of the populations analysed in the study is treated with ICI.</li> <li>• Articles including inflammatory or autoimmune diseases as immune-related adverse events (irAEs) derived from ICI treatment that analyse QoL will be included.</li> </ul>                                                                                                                                                                                                                                                                                                                                                                                                                                                                                               |

### Table S3: Data extraction form

REVIEWER NAME:

1. Title
2. First author
3. Journal
4. Year of publication

#### **STUDY CHARACTERISTICS**

5. Name of the study
6. Clinical trial ID (if applicable)
7. Duration of the study (if available)
  - a. Started (year)
  - b. Ended (year)
8. Funding source /sponsor
  - a. Company
  - b. Grant
9. QALY study
  - o Yes
  - o No
10. What is the stated purpose of the study?
11. Study design
  - Clinical trial
    12.
      - o Phase I
      - o Phase II
      - o Phase III
    13.
      - o Controlled / comparative
      - o Open-label
  - Observational
  - Randomized
  - Controlled
  - Case report
  - Case series
  - Interventional study
  - Systematic review
  - Other (specify)
14. Disease / condition
15. Intervention group
  - Nivolumab
  - Pembrolizumab
  - Ipilimumab
  - Atezolizumab
  - Avelumab
  - Durvalumab
  - Combination (specify)
16. Control group
  - Placebo
  - Other (specify)
  - Not applicable
17. Type of treatment
  - First line
  - Second line
  - Third line
  - Adjuvant/ combination (specify)

- Other (specify)
- Not reported

18. Inclusion criteria

19. Exclusion criteria

20. Study sample size:

- Total (n)
- Control group (n)
- Intervention group (n)

21. PRO tool completion at baseline

- Total (n)
- Control group (n)
- Intervention group (n)

22. Study attrition

- Total (n) end of study
- Control group (n) end of study
- Intervention group (n) end of study
- Reason(s) for attrition reported in the study

23. PRO tool attrition

- Total (n) end of study
- Control group (n) end of study
- Intervention group (n) end of study
- Reason(s) for attrition reported in the study

24. Missing study data – reason(s) reported in the study

25. Missing PRO tool data – reason(s) reported in the study

26. Notes/comments

### **ANALYSIS, RESULTS, CONCLUSIONS**

1. Describe the methods used for the data analysis

2. Statistical significance

- o..Yes (specify)
- o..No (specify reason)

3. Clinical relevance

- o..Yes (specify)
- o..No

4. Results (as stated by the author)

5. Main findings/conclusions (as stated by the author)

### **Methodological issues related to the measurement of the PRO**

6. Authors comments about the methods (i.e. overpowered, compliance, etc...)

7. Authors comments about the tool(s) (i.e. validity, specificity, limitations, etc...)

8. Reviewers comments

### **Other references related to this study (same population sample)**

9. Original Clinical Trial study

10. Other PRO studies



11. QALY studies

**PRO tool**

**Name of the PRO**

**Was the PRO used as**

- Primary outcome
- Secondary outcome
- Exploratory endpoint
- Not reported

**Type of concept reported** by the PRO

- Symptom
  - Specific (specify)
  - Generic (includes different symptoms)
- Quality of life
  - Global health status
  - Physical functioning
  - Role
  - Emotional
  - Cognitive
  - Social
  - Financial
  - Other (specify)
- Experience
- Toxicities / adverse events
- Satisfaction
- Health needs
- Other (specify)
- Not defined

**Is the PRO**

- Generic/health status
- Cancer specific
- Disease site/condition specific
- Symptom specific
- Outcome specific

**Method of administration**

- Paper and pencil
- Electronic device (tablet, smartphone)
- Telephone
- Interview
- Web-based / on-line
- Not reported
- Other (specify)

**Schedule of administration / timepoints:** (i.e. Baseline, week 9 and every 6 weeks up to 2 years)  
or not reported

**PRO data**

- Reported
- Not reported

**Method for the data analysis**

- Regression
- Post-hoc
- Meta-analysis
- Economic
- Other (specify)

**Figure S1: ICI-CT registered in clinicaltrials.gov (2004-2019)**

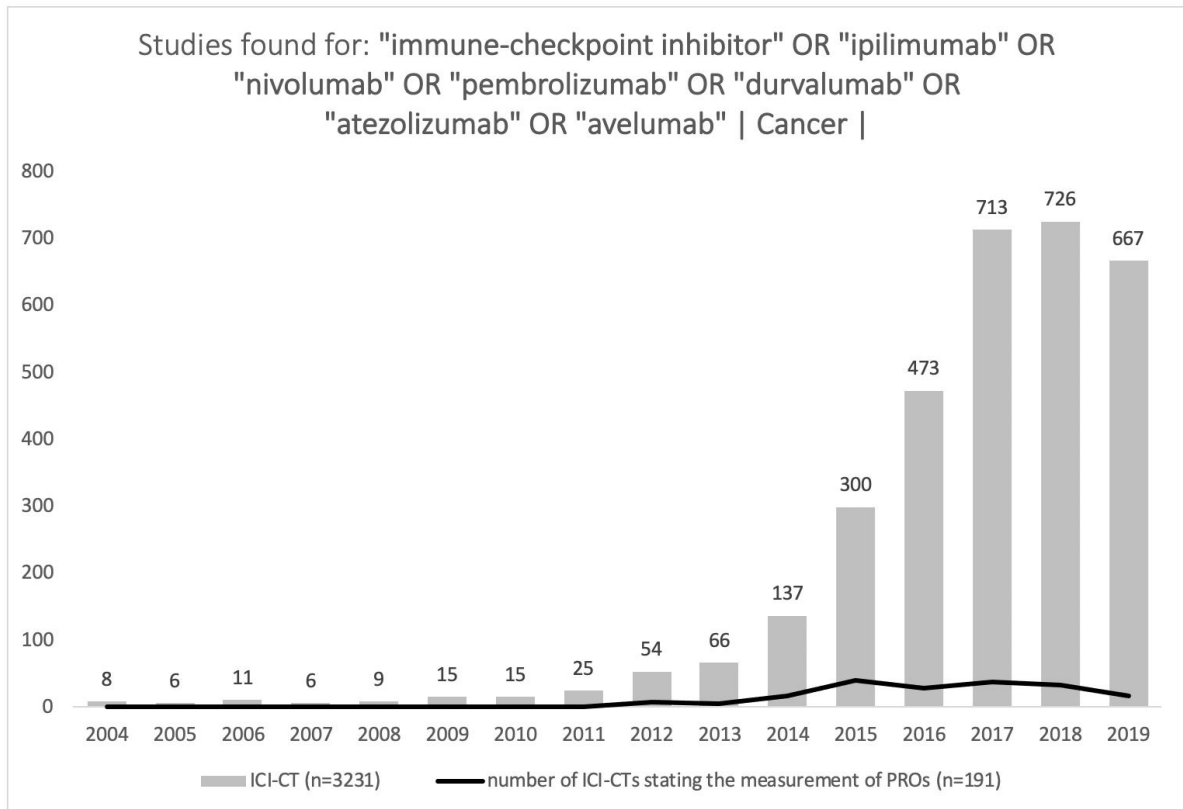

Source: clinicaltrials.gov

Start date from 01/01/2004 to 31/12/2019

**Table S4: List of identified clinical trials stating the use of PROs**

The following instruments include FACT-G domains and have been categorized as cancer-specific (indicated in *italics*) and disease-specific: FACT-L; FACT-M; FACT-BL; FACT-Hep; FACT-Cx; FACT-H&N; FACT-BRM; FACT-BL-Cys; FACT-Taxane; FACIT-D.

| Trial | Trial ID               | Condition / disease                                   | Drug                      | Phase | Participants | Start | Endpoint | instruments |               |                     |                 |           | Source for PRO instrument identification  | Comments                                                                                                                                                                            |
|-------|------------------------|-------------------------------------------------------|---------------------------|-------|--------------|-------|----------|-------------|---------------|---------------------|-----------------|-----------|-------------------------------------------|-------------------------------------------------------------------------------------------------------------------------------------------------------------------------------------|
| 1     | 15-592                 | Advanced Non-Clear Cell Kidney Cancer                 | Atezolizumab              | 2     | 60           | 2016  | S        |             |               | FKSI-19             | BFI             |           | conf abstract + clin trials + publication |                                                                                                                                                                                     |
| 2     | 516-005                | Metastatic Non-Squamous Non-Small Cell Lung Cancer    | Nivolumab                 | 3     | 532          | 2019  | S        | NR          |               |                     |                 |           | NR                                        |                                                                                                                                                                                     |
| 3     | A031501, AMBASSADOR    | Bladder Cancer and Locally Advanced Urothelial Cancer | Pembrolizumab             | 3     | 739          | 2017  | E        | EQ-5D       | EORTC QLQ-C30 | QLQ-BLM30           |                 |           | conf abstract + sponsor website           | <a href="https://www.uchicagomedicine.org/find-a-clinical-trial/clinical-trial/b/cirb171483">https://www.uchicagomedicine.org/find-a-clinical-trial/clinical-trial/b/cirb171483</a> |
| 4     | A031704, PDIGREE       | Advanced Kidney Cancer                                | Ipilimumab / Nivolumab    | 3     | 1046         | 2019  | NR       | EQ-5D       |               | FKSI-19             | PROMIS Fatigue  |           | conf abstract                             |                                                                                                                                                                                     |
| 5     | ABC / CA209-170        | Melanoma / Brain Metastases                           | Ipilimumab / Nivolumab    | 2     | 76           | 2014  | S        | EQ-5D       | EORTC QLQ-C30 | QLQ-BM20            |                 |           | conf abstract                             |                                                                                                                                                                                     |
| 6     | ABOUND.2L+             | Non-Small-Cell Lung                                   | Durvalumab                | 2     | 240          | 2015  | E        | EQ-5D       | EORTC QLQ-C30 | LCSS                |                 |           | conf abstract + protocol                  | <a href="https://clinicaltrials.gov/ProvidedDocs/26/NCT02250326/Prot_001.pdf">https://clinicaltrials.gov/ProvidedDocs/26/NCT02250326/Prot_001.pdf</a>                               |
| 7     | ADRIATIC               | Small Cell Lung Cancer                                | Durvalumab / Tremelimumab | 3     | 600          | 2018  | S        |             | EORTC QLQ-C30 | QLQ-LC13            |                 |           | clin trials                               |                                                                                                                                                                                     |
| 8     | AFT-16                 | Non-Small-Cell Lung                                   | Atezolizumab              | 2     | 64           | 2017  | S        |             | EORTC QLQ-C30 |                     |                 |           | conf abstract                             |                                                                                                                                                                                     |
| 9     | AIOSTO-0417-MOONLIGHT  | Stomach-GastroEsophageal Cancer                       | Nivolumab / Ipilimumab    | 2     | 119          | 2018  | S        |             | EORTC QLQ-C30 |                     |                 |           | conf abstract                             |                                                                                                                                                                                     |
| 10    | ALPS                   | Pancreatic Ductal Adenocarcinoma                      | Durvalumab / Tremelimumab | 2     | 65           | 2015  | S        | EQ-5D       | EORTC QLQ-C30 | QLQ-PAN26           |                 | PRO-CTCAE | protocol                                  | <a href="https://clinicaltrials.gov/ProvidedDocs/94/NCT02558894/Prot_000.pdf">https://clinicaltrials.gov/ProvidedDocs/94/NCT02558894/Prot_000.pdf</a>                               |
| 11    | ARCTIC                 | Non-Small-Cell Lung                                   | Durvalumab                | 3     | 597          | 2015  | S        |             | EORTC QLQ-C30 | QLQ-LC13            |                 |           | protocol                                  | <a href="https://clinicaltrials.gov/ProvidedDocs/48/NCT02352948/Prot_001.pdf">https://clinicaltrials.gov/ProvidedDocs/48/NCT02352948/Prot_001.pdf</a>                               |
| 12    | ARION/PRODIGE67-UCGI33 | Esophagus Cancer                                      | Durvalumab                | 2     | 120          | 2018  | S        |             | EORTC QLQ-C30 | QLQ-OES18           |                 |           | clin trials                               |                                                                                                                                                                                     |
| 13    | ATEZO-BRAIN            | Non-Small-Cell Lung                                   | Atezolizumab              | 2     | 40           | 2018  | E        |             | EORTC QLQ-C30 | QLQ-LC13 + QLQ-BN20 |                 |           | clin trials                               |                                                                                                                                                                                     |
| 14    | ATOMIC, A021502        | Colon Adenocarcinoma                                  | Atezolizumab              | 3     | 700          | 2017  | S        | NR          |               |                     |                 |           | NR                                        |                                                                                                                                                                                     |
| 15    | AttEnd                 | Endometrial Cancer                                    | Atezolizumab              | 3     | 550          | 2018  | S        |             | EORTC QLQ-C30 | QLQ-EN24            | GP5 item FACT-G |           | clin trials                               | GP5 item FACT-G "I am bothered by side effects of treatment"                                                                                                                        |
| 16    | ATTRACTION-3           | Esophageal Cancer                                     | Nivolumab                 | 3     | 390          | 2015  | E        | EQ-5D       |               |                     |                 |           | CT study publication                      | <a href="https://doi.org/10.1016/S1470-2045(19)30626-6">https://doi.org/10.1016/S1470-2045(19)30626-6</a>                                                                           |
| 17    | BR31                   | Non-Small-Cell Lung                                   | Durvalumab                | 3     | 1360         | 2014  | S        |             | EORTC QLQ-C30 | QLQ-LC13            |                 |           | clin trials                               |                                                                                                                                                                                     |

Colomer-Lahiguera *et al. Journal of Patient-Reported Outcomes*

| Trial | Trial ID              | Condition / disease                         | Drug                      | Phase | Participants | Start | Endpoint | instruments   |               |          |  | Source for PRO instrument identification | Comments                                                         |                                                                                                                                                                                                     |
|-------|-----------------------|---------------------------------------------|---------------------------|-------|--------------|-------|----------|---------------|---------------|----------|--|------------------------------------------|------------------------------------------------------------------|-----------------------------------------------------------------------------------------------------------------------------------------------------------------------------------------------------|
| 18    | CA045-001             | Melanoma                                    | Nivolumab                 | 3     | 764          | 2018  | E        | NR            |               |          |  |                                          | NR                                                               |                                                                                                                                                                                                     |
| 19    | CA184-024             | Melanoma                                    | Ipilimumab                | 3     | 681          | 2006  | S        |               | EORTC QLQ-C30 |          |  |                                          | Conf abstract + protocol                                         | <a href="https://www.nejm.org/doi/suppl/10.1056/NEJMoa1104621/suppl_file/nejmoa1104621_protocol.pdf">https://www.nejm.org/doi/suppl/10.1056/NEJMoa1104621/suppl_file/nejmoa1104621_protocol.pdf</a> |
| 20    | CA184-316 (ILP+/-IP1) | Melanoma                                    | Ipilimumab                | 2     | 4            | 2014  | S        | NR            |               |          |  |                                          | NR                                                               |                                                                                                                                                                                                     |
| 21    | CA209-678             | HepatoCellular Carcinoma                    | Nivolumab                 | 2     | 40           | 2016  | S        | EORTC QLQ-C30 | FACT-G        | FACT-HEP |  |                                          | conf abstract + clin trials                                      |                                                                                                                                                                                                     |
| 22    | CA209-817             | Lung Cancer                                 | Ipilimumab / Nivolumab    | 4     | 1100         | 2016  | S        |               | FACT-G        | FACT-L   |  |                                          | conf abstract + clin trials                                      |                                                                                                                                                                                                     |
| 23    | CALLA                 | Locally Advanced Cervical Cancer            | Durvalumab                | 3     | 714          | 2019  | S        |               | EORTC QLQ-C30 | QLQ-CX24 |  |                                          | conf abstract + clin trials                                      |                                                                                                                                                                                                     |
| 24    | CAPRA                 | Melanoma                                    | Pembrolizumab             | 1     | 36           | 2015  | S        | NR            |               |          |  |                                          |                                                                  |                                                                                                                                                                                                     |
| 25    | CASPAN                | Small Cell Lung Carcinoma Extensive Disease | Durvalumab / Tremelimumab | 3     | 988          | 2017  | S        |               | EORTC QLQ-C30 | QLQ-LC13 |  |                                          | conf abstract + clin trials                                      |                                                                                                                                                                                                     |
| 26    | CCTG BR-34            | Lung Cancer Metastatic                      | Durvalumab / Tremelimumab | 2     | 301          | 2015  | S        | NR            |               |          |  |                                          | NR                                                               |                                                                                                                                                                                                     |
| 27    | CCTG CO.26            | Colorectal Cancer                           | Durvalumab / Tremelimumab | 2     | 179          | 2016  | S        |               | EORTC QLQ-C30 |          |  |                                          | conf abstract + clin trials                                      |                                                                                                                                                                                                     |
| 28    | CCTG HN.9             | Oropharyngeal Squamous Cell Carcinoma       | Durvalumab / Tremelimumab | 2     | 180          | 2018  | S        |               | FACT-G        | FACT H&N |  | PRO-CTCAE                                | clin trials                                                      |                                                                                                                                                                                                     |
| 29    | CCTG ME.13/STOP GAP   | Unresectable/Metastatic Melanoma            | Pembrolizumab / Nivolumab | 3     | 614          | 2016  | S        | EQ-5D         | EORTC QLQ-C30 |          |  |                                          | clin trials                                                      |                                                                                                                                                                                                     |
| 30    | CCTG PA.7             | Pancreatic Adenocarcinoma                   | Durvalumab / Tremelimumab | 2     | 180          | 2016  | S        | NR            |               |          |  |                                          | NR                                                               |                                                                                                                                                                                                     |
| 31    | Checkmate 017         | Non-Small Cell Lung Cancer                  | Nivolumab                 | 3     | 352          | 2012  | S        | EQ-5D         |               | LCSS     |  |                                          | conf abstract + clin trials + protocol + publication PRO results | <a href="https://www.nejm.org/doi/suppl/10.1056/NEJMoa1504627/suppl_file/nejmoa1504627_protocol.pdf">https://www.nejm.org/doi/suppl/10.1056/NEJMoa1504627/suppl_file/nejmoa1504627_protocol.pdf</a> |
| 32    | CheckMate 025         | Renal cell carcinoma                        | Nivolumab                 | 3     | 1068         | 2012  | S        | EQ-5D         |               | FKSI-DRS |  |                                          | conf abstract + clinicaltrials.gov + protocol                    | <a href="https://www.nejm.org/doi/suppl/10.1056/NEJMoa1510665/suppl_file/nejmoa1510665_protocol.pdf">https://www.nejm.org/doi/suppl/10.1056/NEJMoa1510665/suppl_file/nejmoa1510665_protocol.pdf</a> |
| 33    | CheckMate 037         | Melanoma                                    | Nivolumab                 | 3     | 631          | 2012  | S        |               | EORTC QLQ-C30 |          |  |                                          | clin trials                                                      | <a href="https://www.sciencedirect.com/science/article/pii/S1470204515700768?via%3Dihub">https://www.sciencedirect.com/science/article/pii/S1470204515700768?via%3Dihub</a>                         |
| 34    | CheckMate 040         | hepatocellular carcinoma                    | Nivolumab                 | 1/2   | 620          | 2012  | E        | EQ-5D         |               |          |  |                                          | CT study publication                                             | <a href="https://www.sciencedirect.com/science/article/pii/S0140673617310462?via%3Dihub">https://www.sciencedirect.com/science/article/pii/S0140673617310462?via%3Dihub</a>                         |
| 35    | CheckMate 057         | Non-Small Cell Lung Cancer                  | Nivolumab                 | 3     | 792          | 2012  | E        | EQ-5D         |               | LCSS     |  |                                          | conf abstract + publication PRO results                          |                                                                                                                                                                                                     |
| 36    | Checkmate 066         | Melanoma                                    | Nivolumab                 | 3     | 583          | 2013  | S        | EQ-5D         | EORTC QLQ-C30 |          |  |                                          | conf abstract + protocol + publication PRO results               | <a href="https://www.nejm.org/doi/suppl/10.1056/NEJMoa1412082/suppl_file/nejmoa1412082_protocol.pdf">https://www.nejm.org/doi/suppl/10.1056/NEJMoa1412082/suppl_file/nejmoa1412082_protocol.pdf</a> |
| 37    | CheckMate 067         | Melanoma                                    | Ipilimumab / Nivolumab    | 3     | 1296         | 2013  | S        | EQ-5D         | EORTC QLQ-C30 |          |  |                                          | conf abstract + protocol + publication PRO results               | <a href="https://www.nejm.org/doi/suppl/10.1056/NEJMoa1504030/suppl_file/nejmoa1504030_protocol.pdf">https://www.nejm.org/doi/suppl/10.1056/NEJMoa1504030/suppl_file/nejmoa1504030_protocol.pdf</a> |
| 38    | CheckMate 069         | Melanoma                                    | Ipilimumab / Nivolumab    | 2     | 179          | 2013  | S        | EQ-5D         | EORTC QLQ-C30 |          |  |                                          | conf abstract                                                    | <a href="https://www.nejm.org/doi/suppl/10.1056/NEJMoa1414428/suppl_file/nejmoa1414428_protocol.pdf">https://www.nejm.org/doi/suppl/10.1056/NEJMoa1414428/suppl_file/nejmoa1414428_protocol.pdf</a> |
| 39    | CheckMate 078         | Non-Small Cell Lung Cancer                  | Nivolumab                 | 3     | 639          | 2015  | S        | EQ-5D         |               | LCSS     |  |                                          | protocol                                                         | <a href="https://clinicaltrials.gov/ProvidedDocs/07/NCT02613507/Prot_000.pdf">https://clinicaltrials.gov/ProvidedDocs/07/NCT02613507/Prot_000.pdf</a>                                               |

Colomer-Lahiguera *et al.* Journal of Patient-Reported Outcomes

| Trial | Trial ID      | Condition / disease   | Drug                                                                         | Phase                     | Participants | Start | Endpoint | instruments |       |               |           | Source for PRO instrument identification | Comments                                |                                                                                                                                                                                                     |  |
|-------|---------------|-----------------------|------------------------------------------------------------------------------|---------------------------|--------------|-------|----------|-------------|-------|---------------|-----------|------------------------------------------|-----------------------------------------|-----------------------------------------------------------------------------------------------------------------------------------------------------------------------------------------------------|--|
| 40    | CheckMate 141 | NCT02105636           | Squamous Cell Carcinoma of the Head and Neck                                 | Nivolumab                 | 3            | 506   | 2014     | E           | EQ-5D | EORTC QLQ-C30 | QLQ-H&N35 |                                          | conf abstract + publication PRO results | <a href="https://www.nejm.org/doi/suppl/10.1056/NEJMoa1602252/suppl_file/nejmoa1602252_protocol.pdf">https://www.nejm.org/doi/suppl/10.1056/NEJMoa1602252/suppl_file/nejmoa1602252_protocol.pdf</a> |  |
| 41    | CheckMate 142 | NCT02060188           | Colorectal Cancer                                                            | Ipilimumab / Nivolumab    | 2            | 340   | 2014     | E           | EQ-5D | EORTC QLQ-C30 |           |                                          | conf abstract                           | <a href="https://www.thelancet.com/journals/lanonc/article/PIIS1470-2045(17)30422-9/fulltext">https://www.thelancet.com/journals/lanonc/article/PIIS1470-2045(17)30422-9/fulltext</a>               |  |
| 42    | CheckMate 153 | NCT02066636           | Non-Small Cell Lung Cancer                                                   | Nivolumab                 | 3            | 1380  | 2014     | E           | EQ-5D |               | LCSS      |                                          | publication PRO results                 |                                                                                                                                                                                                     |  |
| 43    | CheckMate 205 | NCT02181738           | Hodgkin Lymphoma                                                             | Nivolumab                 | 2            | 338   | 2014     | E           |       | EORTC QLQ-C30 |           |                                          | conf abstract + protocol                | <a href="https://clinicaltrials.gov/ProvidedDocs/38/NCT02181738/Prot_000.pdf">https://clinicaltrials.gov/ProvidedDocs/38/NCT02181738/Prot_000.pdf</a>                                               |  |
| 44    | CheckMate 214 | NCT02231749           | Advanced Renal Cell Carcinoma                                                | Ipilimumab / Nivolumab    | 3            | 1390  | 2014     | E           | EQ-5D | FACT-G        | FKSI-19   |                                          | conf abstract + publication PRO results |                                                                                                                                                                                                     |  |
| 45    | CheckMate 227 | NCT02477826           | Non-Small Cell Lung Cancer                                                   | Ipilimumab / Nivolumab    | 3            | 2220  | 2015     | E           | EQ-5D |               | LCSS      |                                          | conf abstract + publication PRO results |                                                                                                                                                                                                     |  |
| 46    | CheckMate 275 | NCT02387996           | urothelial cancer                                                            | Nivolumab                 | 2            | 386   | 2015     | E           | EQ-5D | EORTC QLQ-C30 |           |                                          | pubication                              | <a href="https://www.sciencedirect.com/science/article/pii/S1470204517300657?via%3Dihub">https://www.sciencedirect.com/science/article/pii/S1470204517300657?via%3Dihub</a>                         |  |
| 47    | CheckMate 358 | NCT02488759           | Various Advanced Cancer                                                      | Ipilimumab / Nivolumab    | 1/2          | 1100  | 2015     | E           | EQ-5D | EORTC QLQ-C30 |           |                                          | publication PRO results                 | <a href="https://www.ncbi.nlm.nih.gov/pubmed/31487218?dopt=Abstract">https://www.ncbi.nlm.nih.gov/pubmed/31487218?dopt=Abstract</a>                                                                 |  |
| 48    | CheckMate 401 | NCT02599402           | Melanoma                                                                     | Ipilimumab / Nivolumab    | 3            | 615   | 2015     | E           |       | EORTC QLQ-C30 |           |                                          | conf abstract                           |                                                                                                                                                                                                     |  |
| 49    | CheckMate 870 | NCT03195491           | Non-Small Cell Lung Cancer                                                   | Nivolumab                 | 3            | 400   | 2017     | E           | NR    |               |           |                                          | NR                                      |                                                                                                                                                                                                     |  |
| 50    | CheckMate 914 | NCT03138512           | Renal Cell Carcinoma                                                         | Ipilimumab / Nivolumab    | 3            | 800   | 2017     | E           | EQ-5D |               | FKSI-19   |                                          | abstract                                |                                                                                                                                                                                                     |  |
| 51    | CHECKMATE-143 | NCT02017717           | Recurrent Glioblastoma                                                       | Nivolumab                 | 3            | 626   | 2014     | E           | EQ-5D | EORTC QLQ-C30 | QLQ-BN20  |                                          | conf abstract                           |                                                                                                                                                                                                     |  |
| 52    | CheckMate-459 | NCT02576509           | hepatocellular carcinoma                                                     | Nivolumab                 | 3            | 726   | 2015     | E           | NR    |               |           |                                          | NR                                      |                                                                                                                                                                                                     |  |
| 53    | CIAO          | NCT03144778           | Oropharyngeal Squamous Cell Carcinoma                                        | Durvalumab / Tremelimumab | 1            | 28    | 2017     | S           |       | MDASI         | MDASI-HN  |                                          | clin trials                             |                                                                                                                                                                                                     |  |
| 54    | COMMIT        | NCT02997228           | Colorectal Cancer                                                            | Atezolizumab              | 3            | 347   | 2017     | E           | EQ-5D | EORTC QLQ-C30 | FACT-G    | PROMIS Fatigue                           | PRO-CTCAE                               | clin trials                                                                                                                                                                                         |  |
| 55    | CompARE       | NCT04116047           | Oropharyngeal Cancer                                                         | Durvalumab                | 3            | 695   | 2015     | S           | EQ-5D | EORTC QLQ-C30 | QLQ-H&N35 | MDADI (Dysphagia)                        |                                         | clin trials                                                                                                                                                                                         |  |
| 56    | CONDOR study  | NCT02319044           | squamous cell carcinoma of the head and neck                                 | Durvalumab / Tremelimumab | 2            | 267   | 2015     | S           |       | EORTC QLQ-C30 | QLQ-H&N35 |                                          | clin trials                             | <a href="https://clinicaltrials.gov/ct2/show/NCT02319044">https://clinicaltrials.gov/ct2/show/NCT02319044</a>                                                                                       |  |
| 57    | CONFIRM       | NCT03063450           | Mesothelioma                                                                 | Nivolumab                 | 3            | 336   | 2017     | S           | EQ-5D |               |           |                                          | clin trials + protocol                  | <a href="https://trialsjournal.biomedcentral.com/articles/10.1186/s13063-018-2602-y">https://trialsjournal.biomedcentral.com/articles/10.1186/s13063-018-2602-y</a>                                 |  |
| 58    | D6020C00001   | NCT02118337           | Select Advanced Malignancies, Kidney Cancer, Clear Cell Renal Cell Carcinoma | durvalumab                | 1/2          | 97    | 2014     | E           | NR    |               |           |                                          | NR                                      |                                                                                                                                                                                                     |  |
| 59    | DANTE         | EudraCT2017-002435-42 | metastatic melanoma                                                          | Pembrolizumab / Nivolumab | 4            | 1208  | 2018     | S           | EQ-5D | EORTC QLQ-C30 | QLQ-MEL38 |                                          | WHO international CT registry platform  | <a href="http://apps.who.int/trialsearch/Trial2.aspx?TrialID=EUCTR2017-002435-42-GB">http://apps.who.int/trialsearch/Trial2.aspx?TrialID=EUCTR2017-002435-42-GB</a>                                 |  |
| 60    | DANUBE        | NCT02516241           | Urothelial Cancer                                                            | Durvalumab / Tremelimumab | 3            | 1200  | 2015     | S           |       | FACT-G        | FACT-BL   |                                          | clin trials                             |                                                                                                                                                                                                     |  |

Colomer-Lahiguera *et al.* Journal of Patient-Reported Outcomes

| Trial | Trial ID                  | Condition / disease   | Drug                                                   | Phase                     | Participants | Start | Endpoint | instruments |       |               |                | Source for PRO instrument identification | Comments    |                                                       |                                                                                                                                                                     |
|-------|---------------------------|-----------------------|--------------------------------------------------------|---------------------------|--------------|-------|----------|-------------|-------|---------------|----------------|------------------------------------------|-------------|-------------------------------------------------------|---------------------------------------------------------------------------------------------------------------------------------------------------------------------|
| 61    | DURATION                  | NCT03345810           | Non Small Cell Lung Cancer                             | Durvalumab                | 2            | 200   | 2017     | S           |       | FACT-G        | FACT-L         |                                          |             | clin trials                                           |                                                                                                                                                                     |
| 62    | EAGLE study               | NCT02369874           | squamous cell carcinoma of the head and neck           | Durvalumab / Tremelimumab | 3            | 736   | 2015     | S           | NR    |               |                |                                          |             | NR                                                    |                                                                                                                                                                     |
| 63    | ECHO-304/KEYNOTE-669      | NCT03358472           | Head and Neck Cancer                                   | Pembrolizumab             | 3            | 89    | 2017     | S           | EQ-5D | EORTC QLQ-C30 | QLQ-H&N35      |                                          |             | protocol                                              | <a href="https://clinicaltrials.gov/ProvidedDocs/72/NCT03358472/Prot_SAP_000.pdf">https://clinicaltrials.gov/ProvidedDocs/72/NCT03358472/Prot_SAP_000.pdf</a>       |
| 64    | ECHO-305/KEYNOTE-654      | NCT03322540           | Lung Cancer                                            | Pembrolizumab             | 2            | 154   | 2017     | E           | NR    |               |                |                                          |             | NR                                                    |                                                                                                                                                                     |
| 65    | ECHO-306/KEYNOTE-715      | NCT03322566           | Lung cancer                                            | Pembrolizumab             | 2            | 233   | 2018     | E           | NR    |               |                |                                          |             | NR                                                    |                                                                                                                                                                     |
| 66    | EMERALD-2                 | NCT03847428           | Hepatocellular Carcinoma                               | Durvalumab                | 3            | 888   | 2019     | S           | NR    |               |                |                                          |             | NR                                                    |                                                                                                                                                                     |
| 67    | ENGOT-EN9/LEAP-001        | NCT03884101           | Endometrial Neoplasms                                  | Pembrolizumab             | 3            | 720   | 2019     | S           |       | EORTC QLQ-C30 |                |                                          |             | clin trials                                           |                                                                                                                                                                     |
| 68    | EORTC 1325-MG/KEYNOTE-054 | NCT02362594           | Melanoma                                               | Pembrolizumab             | 3            | 1019  | 2015     | E           | EQ-5D | EORTC QLQ-C30 |                |                                          |             | abstract and protocol                                 | <a href="https://clinicaltrials.gov/ProvidedDocs/94/NCT02362594/Prot_SAP_000.pdf">https://clinicaltrials.gov/ProvidedDocs/94/NCT02362594/Prot_SAP_000.pdf</a>       |
| 69    | EORTC 18071               | NCT00636168           | Melanoma                                               | Ipilimumab                | 3            | 1211  | 2008     | S           |       | EORTC QLQ-C30 |                |                                          |             | conf abstract + clin trials + publication PRO results | <a href="https://ars.els-cdn.com/content/image/1-s2.0-S1470204515701221-mmc1.pdf">https://ars.els-cdn.com/content/image/1-s2.0-S1470204515701221-mmc1.pdf</a>       |
| 70    | FORCE                     | NCT03044626           | Non-Small-Cell Lung                                    | Nivolumab                 | 2            | 101   | 2017     | S           |       | FACT-G        | FACT-L         |                                          |             | clin trials                                           |                                                                                                                                                                     |
| 71    | GeparNuevo                | NCT02685059           | Breast Cancer                                          | Durvalumab                | 2            | 174   | 2016     | S           |       | FACT-G        |                |                                          | FACT-Taxane | EudraCT Number: 2015-002714-72                        | <a href="https://www.clinicaltrialsregister.eu/ctr-search/trial/2015-002714-72/DE#A">https://www.clinicaltrialsregister.eu/ctr-search/trial/2015-002714-72/DE#A</a> |
| 72    | GETHIO21                  | EudraCT2016-003946-99 | pediatric solid tumors presenting in adulthood         | Ipilimumab / Nivolumab    |              |       | 2017     | S           | NR    |               |                |                                          |             | NR                                                    |                                                                                                                                                                     |
| 73    | GHSB AERN                 | NCT03480334           | Classical Hodgkin Lymphoma                             | Nivolumab                 | 2            | 29    | 2019     | S           | NR    |               |                |                                          |             | NR                                                    |                                                                                                                                                                     |
| 74    | HAWK                      | NCT02207530           | squamous cell carcinoma of the head and neck           | Durvalumab                | 2            | 112   | 2014     | S           |       | EORTC QLQ-C30 | QLQ-H&N35      |                                          |             | clin trials                                           |                                                                                                                                                                     |
| 75    | HIMALAYA                  | NCT03298451           | Hepatocellular Carcinoma                               | Durvalumab / Tremelimumab | 3            | 1310  | 2017     | E           | NR    |               |                |                                          |             | NR                                                    |                                                                                                                                                                     |
| 76    | IFCT-1501 MAPS2           | NCT02716272           | Mesothelioma                                           | Ipilimumab / Nivolumab    | 2            | 125   | 2016     | S           |       |               | LCSS           |                                          |             | clin trials                                           |                                                                                                                                                                     |
| 77    | ILLUMINATE 301            | NCT03445533           | Metastatic Melanoma                                    | ipilimumab                | 3            | 454   | 2018     | S           | NR    |               |                |                                          |             | NR                                                    |                                                                                                                                                                     |
| 78    | IMagyn050                 | NCT03038100           | ovarian , fallopian tube, or primary peritoneal cancer | Atezolizumab              | 3            | 1300  | 2017     | E           |       | EORTC QLQ-C30 | EORTC QLQ-OV28 |                                          |             | clin trials                                           |                                                                                                                                                                     |
| 79    | IMbrave150                | NCT03434379           | Hepatocellular Carcinoma                               | Atezolizumab              | 3            | 480   | 2018     | S           |       | EORTC QLQ-C30 |                |                                          |             | clin trials                                           |                                                                                                                                                                     |
| 80    | IMmotion150               | NCT01984242           | Renal Cell Carcinoma                                   | Atezolizumab              | 2            | 305   | 2014     | S           | EQ-5D | MDASI         |                | BFI                                      |             | abstract + clin trials                                |                                                                                                                                                                     |
| 81    | Immotion151               | NCT02420821           | Renal Cell Carcinoma                                   | Atezolizumab              | 3            | 915   | 2017     | S           |       | MDASI         |                | BFI                                      | GP5-FKSI-19 | clin trials                                           | GP5 item FKSI-19 " I am bothered by side effects of treatment"                                                                                                      |
| 82    | IMPACT                    | NCT03570619           | metastatic prostate cancer                             | Ipilimumab / Nivolumab    | 2            | 40    | 2018     | S           | NR    |               |                |                                          |             | NR                                                    |                                                                                                                                                                     |
| 83    | IMpassion030              | NCT03498716           | Triple Negative Breast Cancer                          | Atezolizumab              | 3            | 2300  | 2018     | S           |       | EORTC QLQ-C30 |                |                                          |             | clin trials                                           |                                                                                                                                                                     |

Colomer-Lahiguera *et al.* Journal of Patient-Reported Outcomes

| Trial | Trial ID            | Condition / disease | Drug                                                | Phase                       | Participants | Start | Endpoint | instruments |            |               |           | Source for PRO instrument identification | Comments                                                |                                                                                                                                                                                                                                                                                                                           |
|-------|---------------------|---------------------|-----------------------------------------------------|-----------------------------|--------------|-------|----------|-------------|------------|---------------|-----------|------------------------------------------|---------------------------------------------------------|---------------------------------------------------------------------------------------------------------------------------------------------------------------------------------------------------------------------------------------------------------------------------------------------------------------------------|
|       |                     |                     |                                                     |                             |              |       |          |             |            |               |           |                                          |                                                         |                                                                                                                                                                                                                                                                                                                           |
| 84    | IMpassion031        | NCT03197935         | Triple-negative Breast Cancer                       | Atezolizumab                | 3            | 324   | 2017     | S           |            | EORTC QLQ-C30 |           |                                          | clin trials                                             |                                                                                                                                                                                                                                                                                                                           |
| 85    | IMpassion130        | NCT02425891         | Breast Cancer                                       | Atezolizumab                | 3            | 900   | 2015     | E           | EQ-5D      | EORTC QLQ-C30 | QLQ-BR23  |                                          | protocol                                                | <a href="https://www.nejm.org/doi/suppl/10.1056/NEJMoa1809615/suppl_file/nejmoa1809615_protocol.pdf">https://www.nejm.org/doi/suppl/10.1056/NEJMoa1809615/suppl_file/nejmoa1809615_protocol.pdf</a>                                                                                                                       |
| 86    | IMpassion132        | NCT03371017         | Triple-negative Breast Cancer                       | Atezolizumab                | 3            | 540   | 2018     | S           |            | EORTC QLQ-C30 |           |                                          | conf abstract + clin trials                             |                                                                                                                                                                                                                                                                                                                           |
| 87    | IMpower030          | NCT03456063         | Non-Small-Cell Lung                                 | Atezolizumab                | 3            | 374   | 2018     | S           | GHS/HR QoL |               |           |                                          | clin trials                                             | subscale (Questions 29 and 30) of the EORTC QLQ-C30                                                                                                                                                                                                                                                                       |
| 88    | IMpower130          | NCT02367781         | Non-Small Cell Lung Cancer                          | Atezolizumab                | 3            | 724   | 2015     | S           |            | EORTC QLQ-C30 | QLQ-LC13  | SILC                                     | clin trials                                             | neither publication nor protocol available                                                                                                                                                                                                                                                                                |
| 89    | IMpower131          | NCT02367794         | Non-Small Cell Lung Cancer                          | Atezolizumab                | 3            | 1021  | 2015     | S           |            | EORTC QLQ-C30 | QLQ-LC13  | SILC                                     | clin trials                                             | neither publication nor protocol available                                                                                                                                                                                                                                                                                |
| 90    | IMpower132          | NCT02657434         | Non-Small Cell Lung Cancer                          | Atezolizumab                | 3            | 568   | 2016     | S           |            | EORTC QLQ-C30 | QLQ-LC13  |                                          | clin trials                                             | neither publication nor protocol available                                                                                                                                                                                                                                                                                |
| 91    | IMpower133          | NCT02763579         | Small Cell Lung Carcinoma                           | Atezolizumab                | 3            | 500   | 2016     | S           | EQ-5D      | EORTC QLQ-C30 | QLQ-LC13  |                                          | clinicaltrials.gov + protocol + publication PRO results | <a href="https://www.nejm.org/doi/suppl/10.1056/NEJMoa1809064/suppl_file/nejmoa1809064_protocol.pdf">https://www.nejm.org/doi/suppl/10.1056/NEJMoa1809064/suppl_file/nejmoa1809064_protocol.pdf</a>                                                                                                                       |
| 92    | IMpower150          | NCT02366143         | Non-Small Cell Lung Cancer                          | Atezolizumab                | 3            | 1202  | 2015     | S           | EQ-5D      | EORTC QLQ-C30 | QLQ-LC13  | SILC                                     | clinicaltrials.gov + protocol                           | <a href="https://www.nejm.org/doi/suppl/10.1056/NEJMoa1716948/suppl_file/nejmoa1716948_protocol.pdf">https://www.nejm.org/doi/suppl/10.1056/NEJMoa1716948/suppl_file/nejmoa1716948_protocol.pdf</a>                                                                                                                       |
| 93    | IMspire 170         | NCT03273153         | advanced BRAFV600 wild-type melanoma                | Atezolizumab/P embrolizumab | 3            | 450   | 2017     | E           | GHS/HR QoL |               |           |                                          |                                                         | subscale (Questions 29 and 30) of the EORTC QLQ-C30                                                                                                                                                                                                                                                                       |
| 94    | IMspire150          | NCT02908672         | Melanoma                                            | Atezolizumab                | 3            | 513   | 2017     | S           |            | EORTC QLQ-C30 |           |                                          | clin trials                                             |                                                                                                                                                                                                                                                                                                                           |
| 95    | IMSTAR-HN           | NCT03700905         | Head and Neck Cancer                                | Ipilimumab / Nivolumab      | 3            | 276   | 2018     | S           |            | EORTC QLQ-C30 | QLQ-H&N43 |                                          | clin trials                                             |                                                                                                                                                                                                                                                                                                                           |
| 96    | IMvoke010           | NCT03452137         | quamous Cell Carcinoma of the Head and Neck (SCCHN) | Atezolizumab                | 3            | 400   | 2018     | S           |            | EORTC QLQ-C30 |           |                                          | clin trials                                             |                                                                                                                                                                                                                                                                                                                           |
| 97    | JAVELIN bladder 100 | NCT02603432         | Urothelial Cancer                                   | Avelumab                    | 3            | 668   | 2016     | S           | EQ-5D      | FACT-G        | FACT-BL   |                                          | clin trials                                             |                                                                                                                                                                                                                                                                                                                           |
| 98    | JAVELIN Gastric 100 | NCT02625610         | Gastric cancer                                      | Avelumab                    | 3            | 499   | 2015     | S           | EQ-5D      | EORTC QLQ-C30 | QLQ-STO22 |                                          | conf abstract + clinicaltrials.gov + protocol           | <a href="https://www.futuremedicine.com/doi/10.2217/fo-2018-0668?url_ver=Z39.88-2003&amp;rfr_id=ori:rid:crossref.org&amp;rfr_dat=cr_pub%3dwww.ncbi.nlm.nih.gov">https://www.futuremedicine.com/doi/10.2217/fo-2018-0668?url_ver=Z39.88-2003&amp;rfr_id=ori:rid:crossref.org&amp;rfr_dat=cr_pub%3dwww.ncbi.nlm.nih.gov</a> |
| 99    | JAVELIN Gastric 300 | NCT02625623         | Gastric cancer                                      | Avelumab                    | 3            | 371   | 2015     | S           | EQ-5D      | EORTC QLQ-C30 | QLQ-STO22 |                                          | Conf abstract + protocol + clin trials                  | <a href="https://clinicaltrials.gov/ProvidedDocs/23/NCT02625623/Prot_002.pdf">https://clinicaltrials.gov/ProvidedDocs/23/NCT02625623/Prot_002.pdf</a>                                                                                                                                                                     |
| 100   | JAVELIN Lung 100    | NCT02576574         | Non-Small Cell Lung Cancer                          | Avelumab                    | 3            | 1224  | 2015     | S           | EQ-5D      | EORTC QLQ-C30 | QLQ-LC13  |                                          | conf abstract + clin trials                             |                                                                                                                                                                                                                                                                                                                           |
| 101   | Javelin Lung 200    | NCT02395172         | Non-Small Cell Lung Cancer                          | Avelumab                    | 3            | 792   | 2015     | S           | EQ-5D      | EORTC QLQ-C30 | QLQ-LC13  |                                          | conf abstract + clinicaltrials.gov + protocol           | <a href="https://clinicaltrials.gov/ProvidedDocs/72/NCT02395172/Prot_001.pdf">https://clinicaltrials.gov/ProvidedDocs/72/NCT02395172/Prot_001.pdf</a>                                                                                                                                                                     |
| 102   | JAVELIN Merkel 200  | NCT02155647         | Merkel cell carcinoma                               | Avelumab                    | 2            | 204   | 2014     | E           | EQ-5D      | FACT-G        | FACT-M    |                                          | publication PRO results                                 |                                                                                                                                                                                                                                                                                                                           |
| 103   | JAVELIN Ovarian 100 | NCT02718417         | Ovarian Cancer                                      | Avelumab                    | 3            | 998   | 2016     | S           | EQ-5D      |               | FOSI 18   |                                          | clin trials                                             |                                                                                                                                                                                                                                                                                                                           |

Colomer-Lahiguera *et al.* Journal of Patient-Reported Outcomes

| Trial | Trial ID                               | Condition / disease                                 | Drug                       | Phase | Participants | Start | Endpoint | instruments |               |           |         | Source for PRO instrument identification | Comments                                           |                                                                                                                                                                                                     |
|-------|----------------------------------------|-----------------------------------------------------|----------------------------|-------|--------------|-------|----------|-------------|---------------|-----------|---------|------------------------------------------|----------------------------------------------------|-----------------------------------------------------------------------------------------------------------------------------------------------------------------------------------------------------|
| 104   | JAVELIN Ovarian 200<br>NCT02580058     | Ovarian Cancer                                      | Avelumab                   | 3     | 566          | 2015  | S        | EQ-5D       | EORTC QLQ-C30 | QLQ-OV38  | FOSI    |                                          | conf abstract + clin trials                        |                                                                                                                                                                                                     |
| 105   | JAVELIN Ovarian PARP100<br>NCT03642132 | Ovarian Cancer                                      | Avelumab                   | 3     | 79           | 2018  | S        | EQ-5D       |               |           | FOSI 18 |                                          | clin trials (study discontinued)                   | <a href="https://clinicaltrials.gov/ct2/show/NCT03642132?term=NCT03642132&amp;draw=2&amp;rank=1">https://clinicaltrials.gov/ct2/show/NCT03642132?term=NCT03642132&amp;draw=2&amp;rank=1</a>         |
| 106   | JAVELIN Renal 101<br>NCT02684006       | Renal cell carcinoma                                | Avelumab                   | 3     | 888          | 2016  | S        | EQ-5D       |               |           | FKSI-19 |                                          | clin trials                                        |                                                                                                                                                                                                     |
| 107   | KESTREL<br>NCT02551159                 | squamous cell carcinoma of the head and neck        | Durvalumab / Tremelimumab  | 3     | 823          | 2015  | S        |             | EORTC QLQ-C30 | QLQ-H&N35 |         |                                          | clin trials                                        |                                                                                                                                                                                                     |
| 108   | KEYLYNK-010<br>NCT03834519             | Prostatic Neoplasms                                 | Pembrolizumab              | 3     | 780          | 2019  | S        |             |               |           | BPI-SF  |                                          | clin trials                                        |                                                                                                                                                                                                     |
| 109   | KEYNOTE-002<br>NCT01704287             | Melanoma                                            | Pembrolizumab              | 2     | 540          | 2012  | S        | EQ-5D       | EORTC QLQ-C30 |           |         |                                          | conf abstract + protocol + publication PRO results | <a href="https://ars.els-cdn.com/content/image/1-s2.0-S1470204515000832-mmc1.pdf">https://ars.els-cdn.com/content/image/1-s2.0-S1470204515000832-mmc1.pdf</a>                                       |
| 110   | KEYNOTE-006<br>NCT01866319             | Melanoma                                            | Pembrolizumab / Ipilimumab | 3     | 834          | 2013  | E        | EQ-5D       | EORTC QLQ-C30 |           |         |                                          | conf abstract + protocol + publication PRO results | <a href="https://www.nejm.org/doi/suppl/10.1056/NEJMoa1503093/suppl_file/nejmoa1503093_protocol.pdf">https://www.nejm.org/doi/suppl/10.1056/NEJMoa1503093/suppl_file/nejmoa1503093_protocol.pdf</a> |
| 111   | KEYNOTE-010<br>NCT01905657             | Non-small Cell Lung Cancer                          | Pembrolizumab              | 2/3   | 1061         | 2013  | E        | EQ-5D       | EORTC QLQ-C30 | QLQ-LC13  |         |                                          | conf abstract + protocol + publication PRO results | <a href="https://ars.els-cdn.com/content/image/1-s2.0-S0140673615012817-mmc1.pdf">https://ars.els-cdn.com/content/image/1-s2.0-S0140673615012817-mmc1.pdf</a>                                       |
| 112   | KEYNOTE-024<br>NCT02142738             | Non-small Cell Lung Cancer                          | Pembrolizumab              | 3     | 305          | 2014  | E        |             | EORTC QLQ-C30 | QLQ-LC13  |         |                                          | conf abstract + protocol + publication PRO results | <a href="https://www.nejm.org/doi/suppl/10.1056/NEJMoa1606774/suppl_file/nejmoa1606774_protocol.pdf">https://www.nejm.org/doi/suppl/10.1056/NEJMoa1606774/suppl_file/nejmoa1606774_protocol.pdf</a> |
| 113   | KEYNOTE-033<br>NCT02864394             | Non-Small-Cell Lung                                 | Pembrolizumab              | 3     | 425          | 2016  | E        | NR          |               |           |         |                                          | NR                                                 |                                                                                                                                                                                                     |
| 114   | KEYNOTE-040<br>NCT02252042             | Head and Neck Squamous Cell Cancer                  | Pembrolizumab              | 3     | 495          | 2014  | E        | EQ-5D       | EORTC QLQ-C30 | QLQ-H&N35 |         |                                          | conf abstract + protocol                           | <a href="https://clinicaltrials.gov/ProvidedDocs/42/NCT02252042/Prot_SAP_000.pdf">https://clinicaltrials.gov/ProvidedDocs/42/NCT02252042/Prot_SAP_000.pdf</a>                                       |
| 115   | KEYNOTE-045<br>NCT02256436             | Urothelial Cancer                                   | Pembrolizumab              | 3     | 542          | 2014  | E        | EQ-5D       | EORTC QLQ-C30 |           |         |                                          | conf abstract + publication PRO results            |                                                                                                                                                                                                     |
| 116   | KEYNOTE-057<br>NCT02625961             | Bladder Cancer                                      | Pembrolizumab              | 2     | 260          | 2016  | E        |             | FACT-G        | FACT-BL   |         |                                          | conf abstract                                      |                                                                                                                                                                                                     |
| 117   | KEYNOTE-061<br>NCT02370498             | gastric or gastroesophageal junction adenocarcinoma | Pembrolizumab              | 3     | 592          | 2015  | E        | EQ-5D       | EORTC QLQ-C30 | QLQ-STO22 |         |                                          | conf abstract + protocol                           | <a href="https://clinicaltrials.gov/ProvidedDocs/98/NCT02370498/Prot_SAP_000.pdf">https://clinicaltrials.gov/ProvidedDocs/98/NCT02370498/Prot_SAP_000.pdf</a>                                       |
| 118   | KEYNOTE-062<br>NCT02494583             | Gastric Adenocarcinoma                              | Pembrolizumab              | 3     | 763          | 2015  | S        |             | EORTC QLQ-C30 | QLQ-STO22 |         |                                          | conf abstract + clin trials                        |                                                                                                                                                                                                     |
| 119   | KEYNOTE-087<br>NCT02453594             | Hodgkin Lymphoma                                    | Pembrolizumab              | 2     | 2011         | 2015  | E        | EQ-5D       | EORTC QLQ-C30 |           |         |                                          | protocol + publication PRO results                 | <a href="http://ascopubs.org/doi/suppl/10.1200/JCO.2016.72.1316/suppl_file/protocol_2016.721316.pdf">http://ascopubs.org/doi/suppl/10.1200/JCO.2016.72.1316/suppl_file/protocol_2016.721316.pdf</a> |
| 120   | KEYNOTE-177<br>NCT02563002             | Colorectal Carcinoma                                | Pembrolizumab              | 3     | 308          | 2015  | E        | NR          |               |           |         |                                          | NR                                                 |                                                                                                                                                                                                     |
| 121   | KEYNOTE-181<br>NCT02564263             | Esophageal Carcinoma                                | Pembrolizumab              | 3     | 628          | 2015  | E        | EQ-5D       | EORTC QLQ-C30 | QLQ-OES18 |         |                                          | conf abstract + protocol                           | <a href="https://clinicaltrials.gov/ProvidedDocs/63/NCT02564263/Prot_SAP_000.pdf">https://clinicaltrials.gov/ProvidedDocs/63/NCT02564263/Prot_SAP_000.pdf</a>                                       |
| 122   | KEYNOTE-189<br>NCT02578680             | Non-Small-Cell Lung Carcinoma                       | Pembrolizumab              | 3     | 616          | 2016  | E        | EQ-5D       | EORTC QLQ-C30 | QLQ-LC13  |         |                                          | conf abstract + protocol                           | <a href="https://clinicaltrials.gov/ProvidedDocs/80/NCT02578680/Prot_SAP_000.pdf">https://clinicaltrials.gov/ProvidedDocs/80/NCT02578680/Prot_SAP_000.pdf</a>                                       |
| 123   | KEYNOTE-240<br>NCT02702401             | Hepatocellular Carcinoma                            | Pembrolizumab              | 3     | 413          | 2016  | E        | EQ-5D       | EORTC QLQ-C30 | QLQ-HCC18 |         |                                          | conf abstract + protocol                           | <a href="https://clinicaltrials.gov/ProvidedDocs/01/NCT02702401/Prot_SAP_000.pdf">https://clinicaltrials.gov/ProvidedDocs/01/NCT02702401/Prot_SAP_000.pdf</a>                                       |



Colomer-Lahiguera *et al.* Journal of Patient-Reported Outcomes

| Trial | Trial ID             | Condition / disease | Drug                       | Phase         | Participants | Start | Endpoint | instruments |               |               |             | Source for PRO instrument identification | Comments                                           |                                                                                                                                                                                                                                                                                                                                       |
|-------|----------------------|---------------------|----------------------------|---------------|--------------|-------|----------|-------------|---------------|---------------|-------------|------------------------------------------|----------------------------------------------------|---------------------------------------------------------------------------------------------------------------------------------------------------------------------------------------------------------------------------------------------------------------------------------------------------------------------------------------|
|       |                      |                     |                            |               |              |       |          | EQ-5D       | EORTC QLQ-C30 | QLQ-LC13      |             |                                          |                                                    |                                                                                                                                                                                                                                                                                                                                       |
| 124   | KEYNOTE-407          | NCT02775435         | Non-small Cell Lung Cancer | Pembrolizumab | 3            | 635   | 2016     | E           | EQ-5D         | EORTC QLQ-C30 | QLQ-LC13    |                                          | conf abstract + protocol + publication PRO results | <a href="https://www.nejm.org/doi/suppl/10.1056/NEJMoa1810865/suppl_file/nejmoa1810865_protocol.pdf">https://www.nejm.org/doi/suppl/10.1056/NEJMoa1810865/suppl_file/nejmoa1810865_protocol.pdf</a>                                                                                                                                   |
| 125   | KEYNOTE-412          | NCT03040999         | Head and Neck Neoplasms    | Pembrolizumab | 3            | 780   | 2017     | S           |               | EORTC QLQ-C30 | QLQ-H&N35   |                                          | clin trials                                        |                                                                                                                                                                                                                                                                                                                                       |
| 126   | KEYNOTE-426          | NCT02853331         | Renal cell carcinoma       | Pembrolizumab | 3            | 862   | 2016     | S           | NR            |               |             |                                          | NR                                                 |                                                                                                                                                                                                                                                                                                                                       |
| 127   | KEYNOTE-564          | NCT03142334         | Renal Cell Carcinoma       | Pembrolizumab | 3            | 950   | 2017     | S           |               | EORTC QLQ-C30 | FKSI-DRS    |                                          | clin trials                                        |                                                                                                                                                                                                                                                                                                                                       |
| 128   | KEYNOTE-581-CLEAR    | NCT02811861         | Renal Cell Carcinoma       | Pembrolizumab | 3            | 1069  | 2016     | S           | EQ-5D         | EORTC QLQ-C30 | FKSI-DRS    |                                          | protocol                                           | <a href="https://www.futuremedicine.com/doi/10.2217/fon-2018-0745?url_ver=Z39.88-2003&amp;rfr_id=ori:rid:crossref.org&amp;rfr_dat=cr_pub%3dwww.ncbi.nlm.nih.gov">https://www.futuremedicine.com/doi/10.2217/fon-2018-0745?url_ver=Z39.88-2003&amp;rfr_id=ori:rid:crossref.org&amp;rfr_dat=cr_pub%3dwww.ncbi.nlm.nih.gov</a>           |
| 129   | KEYNOTE-590          | NCT03189719         | Esophageal Neoplasms       | Pembrolizumab | 3            | 749   | 2017     | S           | EQ-5D         | EORTC QLQ-C30 | QLQ-OES18   |                                          | clin trials + protocol                             | <a href="https://www.futuremedicine.com/doi/10.2217/fon-2018-0609?url_ver=Z39.88-2003&amp;rfr_id=ori:rid:crossref.org&amp;rfr_dat=cr_pub%3dwww.ncbi.nlm.nih.gov&amp;">https://www.futuremedicine.com/doi/10.2217/fon-2018-0609?url_ver=Z39.88-2003&amp;rfr_id=ori:rid:crossref.org&amp;rfr_dat=cr_pub%3dwww.ncbi.nlm.nih.gov&amp;</a> |
| 130   | KEYNOTE-604          | NCT03066778         | Small Cell Lung Cancer     | Pembrolizumab | 3            | 453   | 2017     | S           |               | EORTC QLQ-C30 | QLQ-LC13    |                                          | clin trials + protocol                             |                                                                                                                                                                                                                                                                                                                                       |
| 131   | KEYNOTE-629          | NCT03284424         | Squamous Cell Carcinoma    | Pembrolizumab | 2            | 150   | 2017     | E           | NR            |               |             |                                          | NR                                                 |                                                                                                                                                                                                                                                                                                                                       |
| 132   | KEYNOTE-630          | NCT03833167         | Squamous Cell Carcinoma    | Pembrolizumab | 3            | 570   | 2019     | S           |               | EORTC QLQ-C30 |             |                                          | clin trials                                        |                                                                                                                                                                                                                                                                                                                                       |
| 133   | KEYNOTE-671          | NCT03425643         | Non-small Cell Lung Cancer | Pembrolizumab | 3            | 786   | 2018     | S           |               | EORTC QLQ-C30 |             |                                          | clin trials                                        |                                                                                                                                                                                                                                                                                                                                       |
| 134   | KEYNOTE-672/ECHO-307 | NCT03361865         | Urothelial Cancer          | Pembrolizumab | 3            | 93    | 2017     | S           | EQ-5D         | EORTC QLQ-C30 |             |                                          | protocol                                           | <a href="https://clinicaltrials.gov/ProvidedDocs/65/NCT03361865/Prot_SAP_000.pdf">https://clinicaltrials.gov/ProvidedDocs/65/NCT03361865/Prot_SAP_000.pdf</a>                                                                                                                                                                         |
| 135   | KEYNOTE-676          | NCT03711032         | Bladder Cancer             | Pembrolizumab | 3            | 550   | 2018     | S           | EQ-5D         | EORTC QLQ-C30 | QLQ-NMIBC24 |                                          | clin trials                                        |                                                                                                                                                                                                                                                                                                                                       |
| 136   | KEYNOTE-689          | NCT03765918         | Head and Neck Neoplasms    | Pembrolizumab | 3            | 704   | 2018     | S           |               | EORTC QLQ-C30 | QLQ-H&N35   |                                          | clin trials                                        |                                                                                                                                                                                                                                                                                                                                       |
| 137   | KEYNOTE-698/ECHO-303 | NCT03374488         | Urothelial Cancer          | Pembrolizumab | 3            | 84    | 2017     | S           | EQ-5D         | EORTC QLQ-C30 |             |                                          | protocol                                           | <a href="https://clinicaltrials.gov/ProvidedDocs/88/NCT03374488/Prot_SAP_000.pdf">https://clinicaltrials.gov/ProvidedDocs/88/NCT03374488/Prot_SAP_000.pdf</a>                                                                                                                                                                         |
| 138   | KEYNOTE-756          | NCT03725059         | Breast Cancer              | Pembrolizumab | 3            | 1140  | 2018     | S           |               | EORTC QLQ-C30 | QLQ-BR23    |                                          | clin trials                                        |                                                                                                                                                                                                                                                                                                                                       |
| 139   | KEYNOTE-775          | NCT03517449         | Endometrial Neoplasms      | Pembrolizumab | 3            | 780   | 2018     | S           |               | EORTC QLQ-C30 |             |                                          | clin trials                                        |                                                                                                                                                                                                                                                                                                                                       |
| 140   | KEYNOTE-789          | NCT03515837         | Non-small Cell Lung Cancer | Pembrolizumab | 3            | 480   | 2018     | S           |               | EORTC QLQ-C30 | QLQ-LC13    |                                          | conf abstract + clin trials                        |                                                                                                                                                                                                                                                                                                                                       |
| 141   | KEYNOTE-826          | NCT03635567         | Cervical Cancer            | Pembrolizumab | 3            | 600   | 2018     | S           |               | EORTC QLQ-C30 |             |                                          | clin trials                                        |                                                                                                                                                                                                                                                                                                                                       |
| 142   | KEYNOTE-866          | NCT03924856         | Bladder Cancer             | Pembrolizumab | 3            | 790   | 2019     | S           | EQ-5D         | FACT-G        | FACT-BI-Cys |                                          | clin trials                                        |                                                                                                                                                                                                                                                                                                                                       |
| 143   | KEYNOTE-905          | NCT03924895         | Bladder Cancer             | Pembrolizumab | 3            | 610   | 2019     | E           | NR            |               |             |                                          | NR                                                 |                                                                                                                                                                                                                                                                                                                                       |

Colomer-Lahiguera et al. Journal of Patient-Reported Outcomes

| Trial | Trial ID              | Condition / disease                                   | Drug                      | Phase | Participants | Start | Endpoint | instruments   |               |           |                |                     | Source for PRO instrument identification             | Comments                                                                                                                                                                                                                                                                                                     |
|-------|-----------------------|-------------------------------------------------------|---------------------------|-------|--------------|-------|----------|---------------|---------------|-----------|----------------|---------------------|------------------------------------------------------|--------------------------------------------------------------------------------------------------------------------------------------------------------------------------------------------------------------------------------------------------------------------------------------------------------------|
|       |                       |                                                       |                           |       |              |       |          | EQ-5D         | EORTC QLQ-C30 | QLQ-HCC18 |                |                     |                                                      |                                                                                                                                                                                                                                                                                                              |
| 144   | KEYNOTE-937           | Hepatocellular Carcinoma                              | Pembrolizumab             | 3     | 950          | 2019  | S        | EQ-5D         | EORTC QLQ-C30 | QLQ-HCC18 |                |                     | clin trials                                          |                                                                                                                                                                                                                                                                                                              |
| 145   | LEAP-006              | Non-small Cell Lung Cancer                            | Pembrolizumab             | 3     | 726          | 2019  | S        |               | EORTC QLQ-C30 | QLQ-LC13  |                |                     | clin trials                                          |                                                                                                                                                                                                                                                                                                              |
| 146   | LEAP-007              | Non-small Cell Lung Cancer                            | Pembrolizumab             | 3     | 620          | 2019  | S        |               | EORTC QLQ-C30 | QLQ-LC13  |                |                     | clin trials                                          |                                                                                                                                                                                                                                                                                                              |
| 147   | LUD2013-006           | Glioblastoma                                          | Durvalumab                | 2     | 159          | 2015  | S        |               | EORTC QLQ-C30 | QLQ-BN20  |                |                     | conf abstract + clin trials                          |                                                                                                                                                                                                                                                                                                              |
| 148   | LUNAR                 | Non-small Cell Lung Cancer                            | Nivolumab / Pembrolizumab | 3     | 534          | 2016  | S        |               | EORTC QLQ-C30 | QLQ-LC13  |                |                     | conf abstract + clin trials                          |                                                                                                                                                                                                                                                                                                              |
| 149   | MCC-17978             | Malignant Glioma                                      | Pembrolizumab             | 1     | 32           | 2015  | NR       | NR            |               |           |                |                     | NR                                                   |                                                                                                                                                                                                                                                                                                              |
| 150   | MDX010-20             | Melanoma                                              | Ipilimumab                | 3     | 1783         | 2004  | S        | SF-36         | EORTC QLQ-C30 |           | SDS            | FACIT-Fatigue Scale | conf abstract + protocol + publication PRO results   | <a href="https://www.nejm.org/doi/suppl/10.1056/NEJMoa1003466/suppl_file/nejmoa1003466_protocol.pdf">https://www.nejm.org/doi/suppl/10.1056/NEJMoa1003466/suppl_file/nejmoa1003466_protocol.pdf</a>                                                                                                          |
| 151   | MEDISARC AIO-STS 0415 | Adult Soft Tissue Sarcoma                             | Durvalumab / Tremelimumab | 2     | 100          | 2017  | S        |               | EORTC QLQ-C30 |           |                |                     | ab + clin trials                                     |                                                                                                                                                                                                                                                                                                              |
| 152   | MEDITREME             | Colorectal Cancer                                     | Durvalumab / Tremelimumab | 1/2   | 48           | 2017  | S        | NR            |               |           |                |                     | NR                                                   | <i>secondary endpoints include overall response rate and quality of life. Mentioned in conference abstract not in protocol</i><br><a href="https://www.ncbi.nlm.nih.gov/pmc/articles/PMC6012564/">https://www.ncbi.nlm.nih.gov/pmc/articles/PMC6012564/</a>                                                  |
| 153   | MYSTIC                | Non-Small Cell Lung Cancer                            | Durvalumab / Tremelimumab | 3     | 1118         | 2015  | S        | NR            |               |           |                |                     | NR                                                   |                                                                                                                                                                                                                                                                                                              |
| 154   | NCI-2016-00534        | ovarian, fallopian tube, or primary peritoneal cancer | Pembrolizumab             | 2     | 40           | 2016  | NR       | NR            |               |           |                |                     | NR                                                   | <i>"The primary objectives were to assess safety, clinical benefit, response rate, PFS, and quality of life" but not in clin trials nor in WHO database</i><br><a href="http://apps.who.int/trialsearch/Trial3.aspx?trialid=NCT02853318">http://apps.who.int/trialsearch/Trial3.aspx?trialid=NCT02853318</a> |
| 155   | NeoTrio Trial         | Melanoma                                              | Pembrolizumab             | 2     | 60           | 2017  | S        | NR            |               |           |                |                     | NR                                                   |                                                                                                                                                                                                                                                                                                              |
| 156   | NIAGARA               | Bladder Cancer                                        | Durvalumab                | 3     | 1050         | 2018  | S / E    | NR            |               |           |                |                     | NR                                                   |                                                                                                                                                                                                                                                                                                              |
| 157   | NIBIT-M2              | Melanoma with brain metastasis                        | Ipilimumab / Nivolumab    | 3     | 168          | 2012  | S        | NR            |               |           |                |                     | NR                                                   |                                                                                                                                                                                                                                                                                                              |
| 158   | NILE                  | Urothelial Cancer                                     | Durvalumab / Tremelimumab | 3     | 885          | 2018  | S        | NR            |               |           |                |                     | NR                                                   |                                                                                                                                                                                                                                                                                                              |
| 159   | NIVEAU trial          | Lymphoma, Non-Hodgkin                                 | Nivolumab                 | 2/3   | 388          | 2017  | S        | EQ-5D         |               |           |                |                     | conf abstract + clin trials                          |                                                                                                                                                                                                                                                                                                              |
| 160   | NIVOSWITCH            | Renal Cell Carcinoma                                  | Nivolumab                 | 2     | 244          | 2016  | S        |               |               | FKSI-15   |                |                     | conf abstract + clin trials                          |                                                                                                                                                                                                                                                                                                              |
| 161   | NRG LU005             | Limited Stage Lung Small Cell Carcinoma               | Atezolizumab              | 2/3   | 506          | 2019  | S        | EQ-5D-5L      | FACT-G        | FACT-L    | PROMIS Fatigue | PRO-CTCAE           | clin trials                                          | announced as FACT-TOI                                                                                                                                                                                                                                                                                        |
| 162   | NUTMEG                | Glioblastoma Multiforme                               | Nivolumab                 | 2     | 102          | 2018  | S        | EQ-5D-5L      | EORTC QLQ-C30 | QLQ-BN-20 |                |                     | conf abstract + clin trials                          |                                                                                                                                                                                                                                                                                                              |
| 163   | OAK                   | Non-Small Cell Lung Cancer                            | Atezolizumab              | 3     | 1225         | 2014  | S        |               | EORTC QLQ-C30 | QLQ-LC13  |                |                     | conf abstract+ clin trials + publication PRO results |                                                                                                                                                                                                                                                                                                              |
| 164   | OpACIN                | Melanoma                                              | Ipilimumab / Nivolumab    | 1     | 20           | 2015  | NR       | EORTC QLQ-C30 |               |           |                |                     | conf abstract                                        |                                                                                                                                                                                                                                                                                                              |

Colomer-Lahiguera *et al.* Journal of Patient-Reported Outcomes

| Trial | Trial ID             | Condition / disease                          | Drug                      | Phase | Participants | Start | Endpoint | instruments   |               |             |                     |                    | Source for PRO instrument identification              | Comments                                                                                                                                                                                            |
|-------|----------------------|----------------------------------------------|---------------------------|-------|--------------|-------|----------|---------------|---------------|-------------|---------------------|--------------------|-------------------------------------------------------|-----------------------------------------------------------------------------------------------------------------------------------------------------------------------------------------------------|
|       |                      |                                              |                           |       |              |       |          | EQ-5D-5L      | EORTC QLQ-C30 | QLQ-H&N35   |                     |                    |                                                       |                                                                                                                                                                                                     |
| 165   | OPTIM (AIO-KHT-0117) | squamous carcinoma of the head and neck      | Ipilimumab / Nivolumab    | 2     | 280          | 2018  | S        | EQ-5D-5L      | EORTC QLQ-C30 | QLQ-H&N35   |                     |                    | clin trials                                           |                                                                                                                                                                                                     |
| 166   | ORION                | Non-small Cell Lung Cancer                   | Durvalumab                | 2     | 327          | 2018  | S        |               | EORTC QLQ-C30 | QLQ-LC13    |                     |                    | clin trials                                           |                                                                                                                                                                                                     |
| 167   | PACIFIC              | Non-Small Cell Lung Cancer                   | Durvalumab                | 3     | 713          | 2014  | S        | EQ-5D         | EORTC QLQ-C30 | QLQ-LC13    |                     |                    | conf abstract + clin trials + publication PRO results | <a href="https://www.nejm.org/doi/suppl/10.1056/NEJMoa1709937/suppl_file/nejmoa1709937_protocol.pdf">https://www.nejm.org/doi/suppl/10.1056/NEJMoa1709937/suppl_file/nejmoa1709937_protocol.pdf</a> |
| 168   | PACIFIC-6            | Non-small Cell Lung Cancer                   | Durvalumab                | 2     | 150          | 2019  | E        | NR            |               |             |                     |                    | NR                                                    |                                                                                                                                                                                                     |
| 169   | PEARL                | Non-Small Cell Lung Cancer                   | Durvalumab                | 3     | 669          | 2017  | S        |               | EORTC QLQ-C30 |             |                     |                    | clin trials                                           |                                                                                                                                                                                                     |
| 170   | PHAEDRA              | advanced endometrial cancer                  | Durvalumab                | 2     | 70           | 2017  | S        |               | EORTC QLQ-C30 |             |                     |                    | ANZCTR                                                | Trial registration ANZCTR                                                                                                                                                                           |
| 171   | POLEM                | Colon Cancer                                 | Avelumab                  | 3     | 402          | 2018  | S        |               | EORTC QLQ-C30 |             |                     |                    | clin trials                                           |                                                                                                                                                                                                     |
| 172   | POSEIDON             | Non-small Cell Lung Cancer                   | Durvalumab / Tremelimumab | 3     | 1000         | 2017  | S        |               | EORTC QLQ-C30 | QLQ-LC13    |                     |                    | clin trials                                           |                                                                                                                                                                                                     |
| 173   | POSTCARD - GETUG-P13 | Prostate cancer                              | Durvalumab                | 2     | 96           | 2018  | S        |               | EORTC QLQ-C30 | QLQ-PR25    |                     |                    | clinical trials registry EU                           |                                                                                                                                                                                                     |
| 174   | POTOMAC              | Bladder Cancer                               | Durvalumab                | 3     | 975          | 2018  | S        |               | EORTC QLQ-C30 | QLQ-NMIBC24 | pain with BPI + EVA | PRO-CTCAE          | clin trials                                           |                                                                                                                                                                                                     |
| 175   | PRIMMO               | cervical, endometrial or uterine sarcoma     | Pembrolizumab             | 2     | 43           | 2017  | S        |               | FACT-G        | FACT-Cx     |                     |                    | clin trials + protocol                                | <a href="https://bmccancer.biomedcentral.com/articles/10.1186/s12885-019-5676-3">https://bmccancer.biomedcentral.com/articles/10.1186/s12885-019-5676-3</a>                                         |
| 176   | PRISM                | Renal Cancer                                 | Ipilimumab / Nivolumab    | 2     | 189          | 2016  | S        | EQ-5D-5L      | EORTC QLQ-C30 | FKSI-19     |                     | EORTC item bank    | protocol                                              | <a href="https://bmccancer.biomedcentral.com/articles/10.1186/s12885-019-6273-1">https://bmccancer.biomedcentral.com/articles/10.1186/s12885-019-6273-1</a>                                         |
| 177   | PROSPER              | Renal Cancer                                 | Nivolumab                 | 3     | 805          | 2017  | S        |               |               | FKSI-19     |                     | PRO-CTCAE          | clin trials                                           |                                                                                                                                                                                                     |
| 178   | PULSE                | Penile Cancer                                | Avelumab                  | 2     | 32           | 2019  | S        |               | EORTC QLQ-C30 |             |                     |                    | clin trials                                           |                                                                                                                                                                                                     |
| 179   | RAMONA               | Esophageal Cancer                            | Ipilimumab / Nivolumab    | 2     | 75           | 2018  | S        |               | EORTC QLQ-C30 | QLQ-ELD14   |                     |                    | clin trials + protocol                                | <a href="https://bmccancer.biomedcentral.com/articles/10.1186/s12885-019-5446-2">https://bmccancer.biomedcentral.com/articles/10.1186/s12885-019-5446-2</a>                                         |
| 180   | RTOG 3504            | Head and Neck Squamous Cell Carcinoma        | Nivolumab                 | 1     | 40           | 2016  | S        | NR            |               |             |                     |                    | NR                                                    |                                                                                                                                                                                                     |
| 181   | RTOG 3505            | Non-Small Cell Lung Cancer                   | Nivolumab                 | 3     | N/A          | 2016  | S        | EQ-5D-5L      | FACT-G        | FACT-L      | PROMIS Fatigue      |                    | clin trials + protocol                                | <a href="https://clinicaltrials.gov/ProvidedDocs/58/NCT02768558/Prot_SAP_000.pdf">https://clinicaltrials.gov/ProvidedDocs/58/NCT02768558/Prot_SAP_000.pdf</a>                                       |
| 182   | SH MISP203           | squamous cell carcinoma of the head and neck | Pembrolizumab             | 1     | 57           | 2015  | S        |               | FACT-G        | FACT H&N    |                     |                    | conf abstract + clin trials                           | neither publication nor protocol available                                                                                                                                                          |
| 183   | STERIMGLI            | Glioblastoma                                 | Durvalumab                | 1/2   | 62           | 2017  | S        |               | EORTC QLQ-C30 | QLQ-BN20    |                     |                    | clin trials                                           |                                                                                                                                                                                                     |
| 184   | Study 1108           | Advanced Solid Tumors (mUC)                  | Durvalumab                | 1/2   | 1022         | 2012  | E        | EORTC QLQ-C30 | FACT-G        | FACT-BL     | QLQ-cancer modules  | pain (single item) | protocol + publication PRO results                    | <a href="https://jamanetwork.com/journals/jamaoncology/fullarticle/2648865">https://jamanetwork.com/journals/jamaoncology/fullarticle/2648865</a>                                                   |

Colomer-Lahiguera *et al.* *Journal of Patient-Reported Outcomes*

|     | Trial                  | Trial ID    | Condition / disease                        | Drug                   | Phase | Participants | Start | Endpoint | instruments |               |         |                |           | Source for PRO instrument identification | Comments                                                                                                                                                                                                                                                                                                                    |
|-----|------------------------|-------------|--------------------------------------------|------------------------|-------|--------------|-------|----------|-------------|---------------|---------|----------------|-----------|------------------------------------------|-----------------------------------------------------------------------------------------------------------------------------------------------------------------------------------------------------------------------------------------------------------------------------------------------------------------------------|
|     |                        |             |                                            |                        |       |              |       |          | PROMIS GPHS |               |         | PROMIS Fatigue | PRO-CTCAE |                                          |                                                                                                                                                                                                                                                                                                                             |
| 185 | SWOG - 1418/NRG BR-006 | NCT02954874 | Triple-Negative Breast Carcinoma           | Pembrolizumab          | 3     | 1000         | 2016  | P / S    | PROMIS GPHS |               |         | PROMIS Fatigue | PRO-CTCAE | clin trials                              |                                                                                                                                                                                                                                                                                                                             |
| 186 | SWOG-1404              | NCT02506153 | Melanoma                                   | Pembrolizumab          | 3     | 1378         | 2015  | S        | EQ-5D       | FACT-G        |         | FACT-BRM       | FACIT-D   | clin trials                              |                                                                                                                                                                                                                                                                                                                             |
| 187 | TEDOPaM-PRODIGE63      | NCT03806309 | Pancreatic Ductal Adenocarcinoma           | Nivolumab              | 2     | 156          | 2019  | S        |             | EORTC QLQ-C30 |         |                |           | conf abstract + clin trials              |                                                                                                                                                                                                                                                                                                                             |
| 188 | TITAN-RCC              | NCT02917772 | Renal Cell Carcinoma                       | Ipilimumab / Nivolumab | 2     | 200          | 2016  | S        |             |               | FKSI-19 |                |           | clin trials                              |                                                                                                                                                                                                                                                                                                                             |
| 189 | UPCC 25514             | NCT02316002 | Oligometastatic Non-small Cell Lung Cancer | Pembrolizumab          | 2     | 51           | 2015  | S        |             | FACT-G        | FACT-L  |                |           | protocol                                 | <a href="https://clinicaltrials.gov/ProvidedDocs/02/NCT02316002/Prot_SAP_000.pdf">https://clinicaltrials.gov/ProvidedDocs/02/NCT02316002/Prot_SAP_000.pdf</a>                                                                                                                                                               |
| 190 | VinMetAtezo            | NCT03801304 | Non-small Cell Lung Cancer                 | Atezolizumab           | 2     | 71           | 2019  | S        | EQ-5D       | EORTC QLQ-C30 |         |                |           | clin trials + protocol                   | <a href="https://www.futuremedicine.com/doi/10.2217/fon-2019-0730?url_ver=Z39.88-2003&amp;rft_id=ori:rid:crossref.org&amp;rft_dat=cr_pub%3dwww.ncbi.nlm.nih.gov">https://www.futuremedicine.com/doi/10.2217/fon-2019-0730?url_ver=Z39.88-2003&amp;rft_id=ori:rid:crossref.org&amp;rft_dat=cr_pub%3dwww.ncbi.nlm.nih.gov</a> |
| 191 | VLA-013 MITCI          | NCT02307149 | Melanoma                                   | Pembrolizumab          | 1     | 59           | 2015  | S        | NR          |               |         |                |           | NR                                       |                                                                                                                                                                                                                                                                                                                             |

**Table S5: Cochrane checklist**

|                                                                                                                                                                                                                                                                |                                                                                                                                                                                                                                                                                                                                                                                                                                                                                                                                                                                                                                                                                                                                                                                                                                                                                                                                                                                                                                                                                                        |
|----------------------------------------------------------------------------------------------------------------------------------------------------------------------------------------------------------------------------------------------------------------|--------------------------------------------------------------------------------------------------------------------------------------------------------------------------------------------------------------------------------------------------------------------------------------------------------------------------------------------------------------------------------------------------------------------------------------------------------------------------------------------------------------------------------------------------------------------------------------------------------------------------------------------------------------------------------------------------------------------------------------------------------------------------------------------------------------------------------------------------------------------------------------------------------------------------------------------------------------------------------------------------------------------------------------------------------------------------------------------------------|
| <b>Article 1</b>                                                                                                                                                                                                                                               | <b>KEYNOTE-087, pembrolizumab, Hodgkin Lymphoma</b>                                                                                                                                                                                                                                                                                                                                                                                                                                                                                                                                                                                                                                                                                                                                                                                                                                                                                                                                                                                                                                                    |
| <b>First author &amp; year of publication</b>                                                                                                                                                                                                                  | <b>von Tresckow, 2019</b>                                                                                                                                                                                                                                                                                                                                                                                                                                                                                                                                                                                                                                                                                                                                                                                                                                                                                                                                                                                                                                                                              |
| <b>Stated purpose of the article</b>                                                                                                                                                                                                                           | <i>we expand the report on the effect of pembrolizumab on patient-reported health-related quality of life (HRQoL) to include data up to week 24 and data on other HRQoL measures</i>                                                                                                                                                                                                                                                                                                                                                                                                                                                                                                                                                                                                                                                                                                                                                                                                                                                                                                                   |
| <b>What were PROs measuring?</b>                                                                                                                                                                                                                               |                                                                                                                                                                                                                                                                                                                                                                                                                                                                                                                                                                                                                                                                                                                                                                                                                                                                                                                                                                                                                                                                                                        |
| What concepts were the PROs used in the study measuring?                                                                                                                                                                                                       | HRQoL                                                                                                                                                                                                                                                                                                                                                                                                                                                                                                                                                                                                                                                                                                                                                                                                                                                                                                                                                                                                                                                                                                  |
| What rationale (if any) for selection of concept or constructs did the authors provide?                                                                                                                                                                        | Patient-reported outcome (PRO) assessment of the functional and symptomatic benefits of cancer treatment is increasingly used to complement clinical/biological data                                                                                                                                                                                                                                                                                                                                                                                                                                                                                                                                                                                                                                                                                                                                                                                                                                                                                                                                   |
| Were patients involved in the selection of outcomes measured by the PROs?                                                                                                                                                                                      | Not reported                                                                                                                                                                                                                                                                                                                                                                                                                                                                                                                                                                                                                                                                                                                                                                                                                                                                                                                                                                                                                                                                                           |
| <b>Omissions</b>                                                                                                                                                                                                                                               |                                                                                                                                                                                                                                                                                                                                                                                                                                                                                                                                                                                                                                                                                                                                                                                                                                                                                                                                                                                                                                                                                                        |
| Were there any important aspects of health (e.g., symptoms, function, perceptions) or quality of life (e.g. overall evaluation, satisfaction with life) that were omitted in this study from the perspectives of the patient, clinician, significant others... | Treatment-related adverse events – any grade [1]                                                                                                                                                                                                                                                                                                                                                                                                                                                                                                                                                                                                                                                                                                                                                                                                                                                                                                                                                                                                                                                       |
| <b>If randomized trials and other studies measured PROs, what were the instruments' measurement strategies?</b>                                                                                                                                                |                                                                                                                                                                                                                                                                                                                                                                                                                                                                                                                                                                                                                                                                                                                                                                                                                                                                                                                                                                                                                                                                                                        |
| Did investigators use instruments that yield a single indicator or index number, a profile, or a battery or instruments?                                                                                                                                       | Battery of instruments: EQ-5D; EORTC QLQ-C30                                                                                                                                                                                                                                                                                                                                                                                                                                                                                                                                                                                                                                                                                                                                                                                                                                                                                                                                                                                                                                                           |
| If investigators measure PROs, did they use specific or generic measures, or both?                                                                                                                                                                             | Both: General health status and cancer-specific;                                                                                                                                                                                                                                                                                                                                                                                                                                                                                                                                                                                                                                                                                                                                                                                                                                                                                                                                                                                                                                                       |
| Who exactly completed the instruments?                                                                                                                                                                                                                         | all patients receiving the intended treatment                                                                                                                                                                                                                                                                                                                                                                                                                                                                                                                                                                                                                                                                                                                                                                                                                                                                                                                                                                                                                                                          |
| <b>Did the instruments work in the way they were supposed to work - validity?</b>                                                                                                                                                                              |                                                                                                                                                                                                                                                                                                                                                                                                                                                                                                                                                                                                                                                                                                                                                                                                                                                                                                                                                                                                                                                                                                        |
| Had the instruments used been validated previously (provide reference)? Was evidence of prior validation for use in this population presented?                                                                                                                 | <i>The QLQ-C30 is a cancer-specific, 30- item questionnaire found to be valid and reliable<br/>The EQ-5D is a non-disease-specific measure of five health state<br/>The cancer-specific QLQ-C30 instrument has undergone continuous development, refinement, and validation over decades, and a review of published cancer studies using EQ-5D has provided evidence to support its validity and reliability. Both have been used widely in HL clinical trials and other HL research study designs<br/>Aaronson NK, Ahmedzai S, Bergman B, et al. The European Organization for Research and Treatment of Cancer QLQ-C30: a quality-of-life instrument for use in international clinical trials in oncology. J Natl Cancer Inst. 1993<br/>Fayers P, Bottomley A, EORTC Quality of Life Group, et al. Quality of life research within the EORTC QLQ-C30. European Organisation for Research and Treatment of Cancer. Eur J Cancer. 2002<br/>Pickard AS, Neary MP, Cella D. Estimation of minimally important differences in EQ-5D utility and VAS scores in cancer. Health Qual Life Outcomes. 2007</i> |
| Were the instruments re-validated in this study?                                                                                                                                                                                                               | No                                                                                                                                                                                                                                                                                                                                                                                                                                                                                                                                                                                                                                                                                                                                                                                                                                                                                                                                                                                                                                                                                                     |
| <b>Did the instruments work in the way they were supposed to work – ability to measure</b>                                                                                                                                                                     |                                                                                                                                                                                                                                                                                                                                                                                                                                                                                                                                                                                                                                                                                                                                                                                                                                                                                                                                                                                                                                                                                                        |
| Are the PROs able to detect change in patient status, even if those changes are small?                                                                                                                                                                         | <i>Mean changes from baseline to week 24 showed improvements in QLQ-C30 functional and symptom domains in the FAS population and all three cohorts. Similar trends were also observed for QLQC30 at week 12 and for EQ-5D VAS at weeks 12 and 24</i>                                                                                                                                                                                                                                                                                                                                                                                                                                                                                                                                                                                                                                                                                                                                                                                                                                                   |
| <b>Can you make the magnitude of effect (if any) understandable to readers?</b>                                                                                                                                                                                |                                                                                                                                                                                                                                                                                                                                                                                                                                                                                                                                                                                                                                                                                                                                                                                                                                                                                                                                                                                                                                                                                                        |
| Can you provide an estimate of the difference in patients achieving a threshold of function or improvement, and the associated number needed to treat                                                                                                          | NA                                                                                                                                                                                                                                                                                                                                                                                                                                                                                                                                                                                                                                                                                                                                                                                                                                                                                                                                                                                                                                                                                                     |
| <b>Article 2</b>                                                                                                                                                                                                                                               | <b>KEYNOTE-087; pembrolizumab, Hodgkin Lymphoma</b>                                                                                                                                                                                                                                                                                                                                                                                                                                                                                                                                                                                                                                                                                                                                                                                                                                                                                                                                                                                                                                                    |
| <b>First author &amp; year of publication</b>                                                                                                                                                                                                                  | <b>Chen, 2017[1]</b><br><i>*The article presents the results of a phase III study including PROs as an exploratory outcome.</i>                                                                                                                                                                                                                                                                                                                                                                                                                                                                                                                                                                                                                                                                                                                                                                                                                                                                                                                                                                        |

NA: Not applicable

| <b>Article 3</b>                                                                                                                                                                                                                                               |                                                                                                                                                                                                                                                                                                                                                                                                                                                                                                                |
|----------------------------------------------------------------------------------------------------------------------------------------------------------------------------------------------------------------------------------------------------------------|----------------------------------------------------------------------------------------------------------------------------------------------------------------------------------------------------------------------------------------------------------------------------------------------------------------------------------------------------------------------------------------------------------------------------------------------------------------------------------------------------------------|
| <b>First author &amp; year of publication</b>                                                                                                                                                                                                                  | <b>CheckMate 025 ; nivolumab vs everolimus; Renal cell carcinoma</b><br><b>Cella, 2016</b>                                                                                                                                                                                                                                                                                                                                                                                                                     |
| <b>Stated purpose of the article</b>                                                                                                                                                                                                                           | <i>We report on the complete HRQoL analysis, including results from mixed model analyses from CheckMate025</i>                                                                                                                                                                                                                                                                                                                                                                                                 |
| <b>What were PROs measuring?</b>                                                                                                                                                                                                                               |                                                                                                                                                                                                                                                                                                                                                                                                                                                                                                                |
| What concepts were the PROs used in the study measuring?                                                                                                                                                                                                       | HRQoL; symptoms                                                                                                                                                                                                                                                                                                                                                                                                                                                                                                |
| What rationale (if any) for selection of concept or constructs did the authors provide?                                                                                                                                                                        | <i>The main prespecified patient-reported outcome objective in the CheckMate 025 protocol was assessment of disease-related symptom progression in each treatment group based on the FKSI-DRS</i>                                                                                                                                                                                                                                                                                                              |
| Were patients involved in the selection of outcomes measured by the PROs?                                                                                                                                                                                      | Not reported                                                                                                                                                                                                                                                                                                                                                                                                                                                                                                   |
| <b>Omissions</b>                                                                                                                                                                                                                                               |                                                                                                                                                                                                                                                                                                                                                                                                                                                                                                                |
| Were there any important aspects of health (e.g., symptoms, function, perceptions) or quality of life (e.g. overall evaluation, satisfaction with life) that were omitted in this study from the perspectives of the patient, clinician, significant others... | Treatment-related adverse events – any grade [2]                                                                                                                                                                                                                                                                                                                                                                                                                                                               |
| <b>If randomized trials and other studies measured PROs, what were the instruments' measurement strategies?</b>                                                                                                                                                |                                                                                                                                                                                                                                                                                                                                                                                                                                                                                                                |
| Did investigators use instruments that yield a single indicator or index number, a profile, or a battery or instruments?                                                                                                                                       | Battery: The Functional Assessment of Cancer Therapy-Kidney Symptom Index-Disease Related Symptoms (FKSI-DRS) and EQ-5D                                                                                                                                                                                                                                                                                                                                                                                        |
| If investigators measure PROs, did they use specific or generic measures, or both?                                                                                                                                                                             | Both: Disease-specific related symptoms; General health status                                                                                                                                                                                                                                                                                                                                                                                                                                                 |
| Who exactly completed the instruments?                                                                                                                                                                                                                         | patients on-treatment phase from both treatment groups                                                                                                                                                                                                                                                                                                                                                                                                                                                         |
| <b>Did the instruments work in the way they were supposed to work - validity?</b>                                                                                                                                                                              |                                                                                                                                                                                                                                                                                                                                                                                                                                                                                                                |
| Had the instruments used been validated previously (provide reference)? Was evidence of prior validation for use in this population presented?                                                                                                                 | Cella D et al., Development and validation of a scale to measure disease-related symptoms of kidney cancer, 2007.<br>EuroQol Group, EuroQol- a new facility for the measurement of health-related quality of life,1990.<br>Dolan P. Modeling valuations EuroQol health states, 1997<br>Schrag A, et al. The EQ-5D-a generic quality of life measure-is a useful instrument to measure quality of life with patients with Parkinson's disease, 2000.                                                            |
| Were the instruments re-validated in this study?                                                                                                                                                                                                               | No                                                                                                                                                                                                                                                                                                                                                                                                                                                                                                             |
| <b>Did the instruments work in the way they were supposed to work – ability to measure</b>                                                                                                                                                                     |                                                                                                                                                                                                                                                                                                                                                                                                                                                                                                                |
| Are the PROs able to detect change in patient status, even if those changes are small?                                                                                                                                                                         | Yes, significant mean difference between the two groups assessed by the FKSI-DRS. Scores for the EQ-5D utility index and VAS were higher in the Nivolumab group compared with those from patients treated with everolimus.<br><i>Using FKSI-DRS, a clinically meaningful deterioration (p&lt;0.001) in HRQoL was observed for patients receiving everolimus</i><br><i>For nivolumab versus everolimus, more patients experienced a clinically meaningful HRQoL improvement (p=0.001) assessed by EQ-5D VAS</i> |
| <b>Can you make the magnitude of effect (if any) understandable to readers?</b>                                                                                                                                                                                |                                                                                                                                                                                                                                                                                                                                                                                                                                                                                                                |
| Can you provide an estimate of the difference in patients achieving a threshold of function or improvement, and the associated number needed to treat                                                                                                          | NA                                                                                                                                                                                                                                                                                                                                                                                                                                                                                                             |

| <b>Article 4</b>                                                                        |                                                                                                                                                                                                                                                                                                                                                                           |
|-----------------------------------------------------------------------------------------|---------------------------------------------------------------------------------------------------------------------------------------------------------------------------------------------------------------------------------------------------------------------------------------------------------------------------------------------------------------------------|
| <b>First author &amp; year of publication</b>                                           | <b>CheckMate 067; Nivolumab vs Ipilimumab vs Nivolumab + Ipilimumab; Melanoma</b><br><b>Schadendorf, 2017</b>                                                                                                                                                                                                                                                             |
| <b>Stated purpose of the article</b>                                                    | <i>we report analyses of HRQoL for patients with advanced melanoma treated in CheckMate 067</i>                                                                                                                                                                                                                                                                           |
| <b>What were PROs measuring?</b>                                                        |                                                                                                                                                                                                                                                                                                                                                                           |
| What concepts were the PROs used in the study measuring?                                | HRQoL                                                                                                                                                                                                                                                                                                                                                                     |
| What rationale (if any) for selection of concept or constructs did the authors provide? | <i>This toxicity profile might diminish health-related quality of life (HRQoL). Patient-reported outcomes (PROs), such as symptoms, HRQoL, and patient-perceived health status supplement clinical data and are now more important during decision-making in oncology because they provide a holistic understanding of patient experience and treatment effectiveness</i> |
| Were patients involved in the selection of outcomes measured by the PROs?               | Not reported                                                                                                                                                                                                                                                                                                                                                              |
| <b>Omissions</b>                                                                        |                                                                                                                                                                                                                                                                                                                                                                           |

|                                                                                                                                                                                                                                                                |                                                                                                                                                                                                                                                                                                                                                                                                                                                                                                                                        |
|----------------------------------------------------------------------------------------------------------------------------------------------------------------------------------------------------------------------------------------------------------------|----------------------------------------------------------------------------------------------------------------------------------------------------------------------------------------------------------------------------------------------------------------------------------------------------------------------------------------------------------------------------------------------------------------------------------------------------------------------------------------------------------------------------------------|
| Were there any important aspects of health (e.g., symptoms, function, perceptions) or quality of life (e.g. overall evaluation, satisfaction with life) that were omitted in this study from the perspectives of the patient, clinician, significant others... | Treatment-related adverse events – any grade [3]<br><i>The instruments used to assess HRQoL are designed for patients treated with chemotherapy and may not detect the impact of the AEs observed with immunotherapy</i>                                                                                                                                                                                                                                                                                                               |
| <b>If randomized trials and other studies measured PROs, what were the instruments' measurement strategies?</b>                                                                                                                                                |                                                                                                                                                                                                                                                                                                                                                                                                                                                                                                                                        |
| Did investigators use instruments that yield a single indicator or index number, a profile, or a battery of instruments?                                                                                                                                       | battery of instruments: EQ-5D-3L and EQ-5D VAS, EORTC QLQ-C30                                                                                                                                                                                                                                                                                                                                                                                                                                                                          |
| If investigators measure PROs, did they use specific or generic measures, or both?                                                                                                                                                                             | Both: General health status; Cancer-specific                                                                                                                                                                                                                                                                                                                                                                                                                                                                                           |
| Who exactly completed the instruments?                                                                                                                                                                                                                         | all randomised patients                                                                                                                                                                                                                                                                                                                                                                                                                                                                                                                |
| <b>Did the instruments work in the way they were supposed to work - validity?</b>                                                                                                                                                                              |                                                                                                                                                                                                                                                                                                                                                                                                                                                                                                                                        |
| Had the instruments used been validated previously (provide reference)? Was evidence of prior validation for use in this population presented?                                                                                                                 | Aaronson NK, et al. The European Organization for Research and Treatment of Cancer QLQ-C30: a quality-of-life instrument for use in international clinical trials in oncology. 1993<br>Scott NW, et al. EORTC QLQ-C30 reference values. 2008<br>EuroQol Group. EuroQol-a new facility for the measurement of health-related quality of life. 1990<br>Van Reenen M, oppe M. EQ-5D-3L user guide. Version 5.1. 2015<br>Reilly MC,et al. The validity and reproducibility of a work productivity and activity impairment instrument. 1993 |
| Were the instruments re-validated in this study?                                                                                                                                                                                                               | No                                                                                                                                                                                                                                                                                                                                                                                                                                                                                                                                     |
| <b>Did the instruments work in the way they were supposed to work – ability to measure</b>                                                                                                                                                                     |                                                                                                                                                                                                                                                                                                                                                                                                                                                                                                                                        |
| Are the PROs able to detect change in patient status, even if those changes are small?                                                                                                                                                                         | <b>EORTC QLQ-C30:</b> <i>No clinically meaningful changes were observed in any treatment group while on treatment.</i><br><i>No clinically meaningful changes were observed in any group while on treatment in any time point for EQ-5D utility index and for EQ-5D VAS</i><br><i>In this study, HRQoL stayed within ranges defined as minimally important difference (MID) in the EORTC QLQ-C30, EQ-5D utility index, and EQ-5D VAS assessments, including across various subgroups of patients.</i>                                  |
| <b>Can you make the magnitude of effect (if any) understandable to readers?</b>                                                                                                                                                                                |                                                                                                                                                                                                                                                                                                                                                                                                                                                                                                                                        |
| Can you provide an estimate of the difference in patients achieving a threshold of function or improvement, and the associated number needed to treat                                                                                                          | NA                                                                                                                                                                                                                                                                                                                                                                                                                                                                                                                                     |

|                                                                                                                                                                                                                                                                |                                                                                                                                                                                                                                                                                                                                                                                                                                                                                                                                                                                                                                                                  |
|----------------------------------------------------------------------------------------------------------------------------------------------------------------------------------------------------------------------------------------------------------------|------------------------------------------------------------------------------------------------------------------------------------------------------------------------------------------------------------------------------------------------------------------------------------------------------------------------------------------------------------------------------------------------------------------------------------------------------------------------------------------------------------------------------------------------------------------------------------------------------------------------------------------------------------------|
| <b>Article 5</b>                                                                                                                                                                                                                                               | <b>Checkmate 141; Nivolumab vs Investigator's choice; Squamous Cell Carcinoma of the Head and Neck</b>                                                                                                                                                                                                                                                                                                                                                                                                                                                                                                                                                           |
| <b>First author &amp; year of publication</b>                                                                                                                                                                                                                  | <b>Harrington, 2017</b>                                                                                                                                                                                                                                                                                                                                                                                                                                                                                                                                                                                                                                          |
| <b>Stated purpose of article</b>                                                                                                                                                                                                                               | <i>Report the full quality-of-life analysis based on three widely used, validated PRO questionnaires completed by patients in the CheckMate 141 study</i>                                                                                                                                                                                                                                                                                                                                                                                                                                                                                                        |
| <b>What were PROs measuring?</b>                                                                                                                                                                                                                               |                                                                                                                                                                                                                                                                                                                                                                                                                                                                                                                                                                                                                                                                  |
| What concepts were the PROs used in the study measuring?                                                                                                                                                                                                       | Patient-reported quality-of-life outcomes                                                                                                                                                                                                                                                                                                                                                                                                                                                                                                                                                                                                                        |
| What rationale (if any) for selection of concept or constructs did the authors provide?                                                                                                                                                                        | <i>Patient-reported outcomes (PROs) have been collected to assess quality of life in a small number of clinical trials of chemotherapy and targeted therapies in recurrent or metastatic squamous cell carcinoma of the head and neck, few of which have shown improvements or significant differences between treatment groups. However, baseline quality of life scores have been reported to be independent prognostic factors for overall survival in patients with recurrent or metastatic head and neck cancer. Therefore, there is a large unmet medical need for treatments that improve prognosis as well as preserve and maximise quality of life.</i> |
| Were patients involved in the selection of outcomes measured by the PROs?                                                                                                                                                                                      | Not reported                                                                                                                                                                                                                                                                                                                                                                                                                                                                                                                                                                                                                                                     |
| <b>Omissions</b>                                                                                                                                                                                                                                               |                                                                                                                                                                                                                                                                                                                                                                                                                                                                                                                                                                                                                                                                  |
| Were there any important aspects of health (e.g., symptoms, function, perceptions) or quality of life (e.g. overall evaluation, satisfaction with life) that were omitted in this study from the perspectives of the patient, clinician, significant others... | Treatment-related adverse events – any grade [4]<br><i>Although the questionnaires used in this trial have been used previously in several clinical trials, their validation has been done primarily in patients with locally advanced disease; thus, it is possible that certain symptoms of importance in recurrent or metastatic squamous cell carcinoma of the head and neck could have been missed in this and other trials. Furthermore, the EQ-5D is a measure that can be used in general or targeted clinical populations, and is not apt to be as sensitive as a condition-targeted measure that is used in the designated population.</i>             |
| <b>If randomized trials and other studies measured PROs, what were the instruments' measurement strategies?</b>                                                                                                                                                |                                                                                                                                                                                                                                                                                                                                                                                                                                                                                                                                                                                                                                                                  |

|                                                                                                                                                       |                                                                                                                                                                                                                                                                                                                                                                                                                                                                                                                                                                                                                                                                                                                                                                                                                                                                                                                                                                                                                                                                                                                                                                                                                                                                                                                                                                                                                                                                                                                                                                                                                                                                                                                                                                                                             |
|-------------------------------------------------------------------------------------------------------------------------------------------------------|-------------------------------------------------------------------------------------------------------------------------------------------------------------------------------------------------------------------------------------------------------------------------------------------------------------------------------------------------------------------------------------------------------------------------------------------------------------------------------------------------------------------------------------------------------------------------------------------------------------------------------------------------------------------------------------------------------------------------------------------------------------------------------------------------------------------------------------------------------------------------------------------------------------------------------------------------------------------------------------------------------------------------------------------------------------------------------------------------------------------------------------------------------------------------------------------------------------------------------------------------------------------------------------------------------------------------------------------------------------------------------------------------------------------------------------------------------------------------------------------------------------------------------------------------------------------------------------------------------------------------------------------------------------------------------------------------------------------------------------------------------------------------------------------------------------|
| Did investigators use instruments that yield a single indicator or index number, a profile, or a battery of instruments?                              | Battery of instruments: EORTC QLQ-C30; EORTC QLQ-H&N35; EQ-5D-3L and EQ-5D VAS                                                                                                                                                                                                                                                                                                                                                                                                                                                                                                                                                                                                                                                                                                                                                                                                                                                                                                                                                                                                                                                                                                                                                                                                                                                                                                                                                                                                                                                                                                                                                                                                                                                                                                                              |
| If investigators measure PROs, did they use specific or generic measures, or both?                                                                    | Cancer-specific; Disease-specific; General health status                                                                                                                                                                                                                                                                                                                                                                                                                                                                                                                                                                                                                                                                                                                                                                                                                                                                                                                                                                                                                                                                                                                                                                                                                                                                                                                                                                                                                                                                                                                                                                                                                                                                                                                                                    |
| Who exactly completed the instruments?                                                                                                                | patients under treatment and follow-up<br>EQ-5D also in patients which discontinued therapy                                                                                                                                                                                                                                                                                                                                                                                                                                                                                                                                                                                                                                                                                                                                                                                                                                                                                                                                                                                                                                                                                                                                                                                                                                                                                                                                                                                                                                                                                                                                                                                                                                                                                                                 |
| <b>Did the instruments work in the way they were supposed to work - validity?</b>                                                                     |                                                                                                                                                                                                                                                                                                                                                                                                                                                                                                                                                                                                                                                                                                                                                                                                                                                                                                                                                                                                                                                                                                                                                                                                                                                                                                                                                                                                                                                                                                                                                                                                                                                                                                                                                                                                             |
| Had the instruments used been validated previously (provide reference)? Was evidence of prior validation for use in this population presented?        | <i>PRO assessments were done (...) using three validated patient-reported questionnaires the EQ-5D includes other measures that are important to patients with squamous cell carcinoma of the head and neck such as anxiety and depression, as well as measures not covered by the EORTC measures such as the ability to do general, daily activities.</i><br>Mesia R, et al. Quality of life of patients receiving platinum-based chemotherapy plus cetuximab first line for recurrent and/or metastatic squamous cell carcinoma of the head and neck. 2010<br>Machiels JP, et al. Afatinib versus methotrexate as second-line treatment in patients with recurrent or metastatic squamous-cell carcinoma of the head and neck progressing on or after platinum-based therapy (LUX-Head & Neck 1): an open-label, randomised phase 3 trial. 2015<br>Bjordal K, et al. A 12 country field study of the EORTC QLQ-C30 (version 3.0) and the head and neck cancer specific module (EORTC QLQ-H&N35) in head and neck patients. EORTC Quality of Life Group. 2000<br>Bottomley A, et al. An international phase 3 trial in head and neck cancer: quality of life and symptom results: EORTC 24954 on behalf of the EORTC Head and Neck and the EORTC Radiation Oncology Group. 2014<br>Curran D, et al. Quality of life in head and neck cancer patients after treatment with high-dose radiotherapy alone or in combination with cetuximab. 2007<br>Sherman AC, et al. Assessing quality of life in patients with head and neck cancer: cross-validation of the European Organization for Research and Treatment of Cancer (EORTC) Quality of Life Head and Neck module (QLQ-H&N35). 2000<br>Pickard AS, et al. Estimation of minimally important differences in EQ-5D utility and VAS scores in cancer. 2007 |
| Were the instruments re-validated in this study?                                                                                                      | No                                                                                                                                                                                                                                                                                                                                                                                                                                                                                                                                                                                                                                                                                                                                                                                                                                                                                                                                                                                                                                                                                                                                                                                                                                                                                                                                                                                                                                                                                                                                                                                                                                                                                                                                                                                                          |
| <b>Did the instruments work in the way they were supposed to work – ability to measure</b>                                                            |                                                                                                                                                                                                                                                                                                                                                                                                                                                                                                                                                                                                                                                                                                                                                                                                                                                                                                                                                                                                                                                                                                                                                                                                                                                                                                                                                                                                                                                                                                                                                                                                                                                                                                                                                                                                             |
| Are the PROs able to detect change in patient status, even if those changes are small?                                                                | <b>EORTC QLQ-C30:</b> <i>Treatment with nivolumab resulted in adjusted mean changes from baseline to weeks 9 and 15 indicating no clinically meaningful changes. Clinically meaningful deterioration occurred in eight (53%) of the 15 domains in the investigator's choice group at week 15.</i><br><b>EORTC QLQ-H&amp;N35:</b> <i>treatment with investigator's choice led to clinically meaningful deterioration (decline of 10 points or more) at week 15</i><br><b>EQ-5D VAS:</b> <i>patients in the nivolumab group had a clinically meaningful improvement (according to a difference of 7 points or greater) in adjusted mean change in VAS score from baseline to week 15, by contrast with a clinically meaningful deterioration in the investigator's choice group</i><br><b>EQ-5D:</b> <i>Neither significant nor clinically meaningful differences in outcomes were observed at 9 or 15 weeks within or between groups</i>                                                                                                                                                                                                                                                                                                                                                                                                                                                                                                                                                                                                                                                                                                                                                                                                                                                                     |
| <b>Can you make the magnitude of effect (if any) understandable to readers?</b>                                                                       |                                                                                                                                                                                                                                                                                                                                                                                                                                                                                                                                                                                                                                                                                                                                                                                                                                                                                                                                                                                                                                                                                                                                                                                                                                                                                                                                                                                                                                                                                                                                                                                                                                                                                                                                                                                                             |
| Can you provide an estimate of the difference in patients achieving a threshold of function or improvement, and the associated number needed to treat | NA                                                                                                                                                                                                                                                                                                                                                                                                                                                                                                                                                                                                                                                                                                                                                                                                                                                                                                                                                                                                                                                                                                                                                                                                                                                                                                                                                                                                                                                                                                                                                                                                                                                                                                                                                                                                          |
| <b>Article 6</b>                                                                                                                                      |                                                                                                                                                                                                                                                                                                                                                                                                                                                                                                                                                                                                                                                                                                                                                                                                                                                                                                                                                                                                                                                                                                                                                                                                                                                                                                                                                                                                                                                                                                                                                                                                                                                                                                                                                                                                             |
| <b>Checkmate 141; Nivolumab vs Investigator's choice; Squamous Cell Carcinoma of the Head and Neck</b>                                                |                                                                                                                                                                                                                                                                                                                                                                                                                                                                                                                                                                                                                                                                                                                                                                                                                                                                                                                                                                                                                                                                                                                                                                                                                                                                                                                                                                                                                                                                                                                                                                                                                                                                                                                                                                                                             |
| First author & year of publication                                                                                                                    | Ferris, 2016 [4]<br><i>*The article presents the results of a phase III study including PROs as an exploratory outcome.</i>                                                                                                                                                                                                                                                                                                                                                                                                                                                                                                                                                                                                                                                                                                                                                                                                                                                                                                                                                                                                                                                                                                                                                                                                                                                                                                                                                                                                                                                                                                                                                                                                                                                                                 |
| <b>Article 7</b>                                                                                                                                      |                                                                                                                                                                                                                                                                                                                                                                                                                                                                                                                                                                                                                                                                                                                                                                                                                                                                                                                                                                                                                                                                                                                                                                                                                                                                                                                                                                                                                                                                                                                                                                                                                                                                                                                                                                                                             |
| <b>EORTC-18071; Ipilimumab vs Placebo; Melanoma</b>                                                                                                   |                                                                                                                                                                                                                                                                                                                                                                                                                                                                                                                                                                                                                                                                                                                                                                                                                                                                                                                                                                                                                                                                                                                                                                                                                                                                                                                                                                                                                                                                                                                                                                                                                                                                                                                                                                                                             |
| First author & year of publication                                                                                                                    | Coens, 2017                                                                                                                                                                                                                                                                                                                                                                                                                                                                                                                                                                                                                                                                                                                                                                                                                                                                                                                                                                                                                                                                                                                                                                                                                                                                                                                                                                                                                                                                                                                                                                                                                                                                                                                                                                                                 |
| Stated purpose of article                                                                                                                             | <i>we report the HRQoL data from the EORTC 18071 trial. To compare health-related quality-of-life (HRQoL) outcomes between the two treatment groups using the EORTC QLQ-C30 quality-of-life instrument</i>                                                                                                                                                                                                                                                                                                                                                                                                                                                                                                                                                                                                                                                                                                                                                                                                                                                                                                                                                                                                                                                                                                                                                                                                                                                                                                                                                                                                                                                                                                                                                                                                  |
| <b>What were PROs measuring?</b>                                                                                                                      |                                                                                                                                                                                                                                                                                                                                                                                                                                                                                                                                                                                                                                                                                                                                                                                                                                                                                                                                                                                                                                                                                                                                                                                                                                                                                                                                                                                                                                                                                                                                                                                                                                                                                                                                                                                                             |
| What concepts were the PROs used in the study measuring?                                                                                              | health-related quality-of-life (HRQoL) outcomes                                                                                                                                                                                                                                                                                                                                                                                                                                                                                                                                                                                                                                                                                                                                                                                                                                                                                                                                                                                                                                                                                                                                                                                                                                                                                                                                                                                                                                                                                                                                                                                                                                                                                                                                                             |
| What rationale (if any) for selection of concept or constructs did the authors provide?                                                               | <i>A pre-specified secondary endpoint of this study was to compare health-related quality-of-life (HRQoL) outcomes between the two treatment groups</i>                                                                                                                                                                                                                                                                                                                                                                                                                                                                                                                                                                                                                                                                                                                                                                                                                                                                                                                                                                                                                                                                                                                                                                                                                                                                                                                                                                                                                                                                                                                                                                                                                                                     |
| Were patients involved in the selection of outcomes measured by the PROs?                                                                             | Not reported                                                                                                                                                                                                                                                                                                                                                                                                                                                                                                                                                                                                                                                                                                                                                                                                                                                                                                                                                                                                                                                                                                                                                                                                                                                                                                                                                                                                                                                                                                                                                                                                                                                                                                                                                                                                |



|                                                                                                                                                                                                                                                                |                                                                                                                                                                                                                                                                                                                                                                                                                                                                                                                                                                                                                                                                                                                                                                                                                                                                                                                |
|----------------------------------------------------------------------------------------------------------------------------------------------------------------------------------------------------------------------------------------------------------------|----------------------------------------------------------------------------------------------------------------------------------------------------------------------------------------------------------------------------------------------------------------------------------------------------------------------------------------------------------------------------------------------------------------------------------------------------------------------------------------------------------------------------------------------------------------------------------------------------------------------------------------------------------------------------------------------------------------------------------------------------------------------------------------------------------------------------------------------------------------------------------------------------------------|
| <b>Omissions</b>                                                                                                                                                                                                                                               |                                                                                                                                                                                                                                                                                                                                                                                                                                                                                                                                                                                                                                                                                                                                                                                                                                                                                                                |
| Were there any important aspects of health (e.g., symptoms, function, perceptions) or quality of life (e.g. overall evaluation, satisfaction with life) that were omitted in this study from the perspectives of the patient, clinician, significant others... | Treatment-related adverse events – any grade [5]<br><i>Although the EORTC QLQ-C30 questionnaire is one of the most commonly used and validated measures within the oncology clinical trials setting, when applied to this particular study, no immunotherapy-specific validation exists, and several symptoms common to immune-related adverse events are missing. Most notably absent are symptoms related to endocrine (hypothyroiditis, hypophysitis) or skin reactions, which can be significant burdens for the patient that are not always clinically apparent.</i>                                                                                                                                                                                                                                                                                                                                      |
| <b>If randomized trials and other studies measured PROs, what were the instruments' measurement strategies?</b>                                                                                                                                                |                                                                                                                                                                                                                                                                                                                                                                                                                                                                                                                                                                                                                                                                                                                                                                                                                                                                                                                |
| Did investigators use instruments that yield a single indicator or index number, a profile, or a battery of instruments?                                                                                                                                       | Single instrument: EORTC QLQ-C30                                                                                                                                                                                                                                                                                                                                                                                                                                                                                                                                                                                                                                                                                                                                                                                                                                                                               |
| If investigators measure PROs, did they use specific or generic measures, or both?                                                                                                                                                                             | cancer-specific                                                                                                                                                                                                                                                                                                                                                                                                                                                                                                                                                                                                                                                                                                                                                                                                                                                                                                |
| Who exactly completed the instruments?                                                                                                                                                                                                                         | All randomized patients                                                                                                                                                                                                                                                                                                                                                                                                                                                                                                                                                                                                                                                                                                                                                                                                                                                                                        |
| <b>Did the instruments work in the way they were supposed to work - validity?</b>                                                                                                                                                                              |                                                                                                                                                                                                                                                                                                                                                                                                                                                                                                                                                                                                                                                                                                                                                                                                                                                                                                                |
| Had the instruments used been validated previously (provide reference)? Was evidence of prior validation for use in this population presented?                                                                                                                 | <i>This patient-reported-outcome tool [EORTC QLQ-C30] is composed of 30 questions, measuring various aspects of HRQoL that are specific to cancer.</i><br><i>the EORTC QLQ-C30 core questionnaire has been successfully used to detect clinically relevant treatment differences in a melanoma patient population</i><br>Aaronson NK, et al. The European Organization for Research and Treatment of Cancer QLQ-C30: a quality-of-life instrument for use in international clinical trials in oncology. 1993<br>De Wolf L, et al. EORTC translating procedures. Brussels: EORTC Publications, 2009.<br>Bottomley A, et al. Adjuvant therapy with pegylated interferon alfa-2b versus observation in resected stage III melanoma: a phase III randomized controlled trial of health-related quality of life and symptoms by the European Organisation for Research and Treatment of Cancer Melanoma Group. 2009 |
| Were the instruments re-validated in this study?                                                                                                                                                                                                               | No                                                                                                                                                                                                                                                                                                                                                                                                                                                                                                                                                                                                                                                                                                                                                                                                                                                                                                             |
| <b>Did the instruments work in the way they were supposed to work – ability to measure</b>                                                                                                                                                                     |                                                                                                                                                                                                                                                                                                                                                                                                                                                                                                                                                                                                                                                                                                                                                                                                                                                                                                                |
| Are the PROs able to detect change in patient status, even if those changes are small?                                                                                                                                                                         | <i>ipilimumab had no significant effect on global health status after induction.</i><br><i>Significantly worse outcomes in the ipilimumab group compared with the placebo group were found for specific symptom scales—namely, diarrhoea, insomnia, and fatigue</i><br><i>Ipilimumab can be administered in this patient population without clinically relevant deterioration in HRQoL as measured by the EORTC QLQ-C30 questionnaire.</i>                                                                                                                                                                                                                                                                                                                                                                                                                                                                     |
| <b>Can you make the magnitude of effect (if any) understandable to readers?</b>                                                                                                                                                                                |                                                                                                                                                                                                                                                                                                                                                                                                                                                                                                                                                                                                                                                                                                                                                                                                                                                                                                                |
| Can you provide an estimate of the difference in patients achieving a threshold of function or improvement, and the associated number needed to treat                                                                                                          | NA                                                                                                                                                                                                                                                                                                                                                                                                                                                                                                                                                                                                                                                                                                                                                                                                                                                                                                             |

|                                                                                                                                                                                                                                                                |                                                                                                                                                                                                                                                               |
|----------------------------------------------------------------------------------------------------------------------------------------------------------------------------------------------------------------------------------------------------------------|---------------------------------------------------------------------------------------------------------------------------------------------------------------------------------------------------------------------------------------------------------------|
| <b>Article 8</b>                                                                                                                                                                                                                                               |                                                                                                                                                                                                                                                               |
| <b>KEYNOTE-002; Pembrolizumab vs Chemotherapy; Melanoma</b>                                                                                                                                                                                                    |                                                                                                                                                                                                                                                               |
| <b>First author &amp; year of publication</b>                                                                                                                                                                                                                  | Schadendorf, 2016                                                                                                                                                                                                                                             |
| <b>Stated purpose of article</b>                                                                                                                                                                                                                               | <i>To report the analyses of HRQoL for patients with advanced melanoma treated with pembrolizumab compared with investigator's choice of chemotherapy in KEYNOTE-002</i>                                                                                      |
| <b>What were PROs measuring?</b>                                                                                                                                                                                                                               |                                                                                                                                                                                                                                                               |
| What concepts were the PROs used in the study measuring?                                                                                                                                                                                                       | Health Related Quality of Life (HRQoL)                                                                                                                                                                                                                        |
| What rationale (if any) for selection of concept or constructs did the authors provide?                                                                                                                                                                        | <i>Although outcomes for cancer patients are generally measured in terms of survival and response, patient-reported outcomes (PROs) and health-related quality of life (HRQoL) are of high relevance to the patient</i>                                       |
| Were patients involved in the selection of outcomes measured by the PROs?                                                                                                                                                                                      | Not reported                                                                                                                                                                                                                                                  |
| <b>Omissions</b>                                                                                                                                                                                                                                               |                                                                                                                                                                                                                                                               |
| Were there any important aspects of health (e.g., symptoms, function, perceptions) or quality of life (e.g. overall evaluation, satisfaction with life) that were omitted in this study from the perspectives of the patient, clinician, significant others... | Treatment-related adverse events – any grade [6]<br><i>Clinical trial populations may differ from melanoma patients in the general population with regard to motivation, the likelihood of PRO reporting, and ability to withstand treatment-related AEs.</i> |

|                                                                                                                                                       |                                                                                                                                                                                                                                                                                                                                                                                                             |
|-------------------------------------------------------------------------------------------------------------------------------------------------------|-------------------------------------------------------------------------------------------------------------------------------------------------------------------------------------------------------------------------------------------------------------------------------------------------------------------------------------------------------------------------------------------------------------|
| <b>If randomized trials and other studies measured PROs, what were the instruments' measurement strategies?</b>                                       |                                                                                                                                                                                                                                                                                                                                                                                                             |
| Did investigators use instruments that yield a single indicator or index number, a profile, or a battery or instruments?                              | Single instrument: EORTC QLQ-C30                                                                                                                                                                                                                                                                                                                                                                            |
| If investigators measure PROs, did they use specific or generic measures, or both?                                                                    | cancer-specific                                                                                                                                                                                                                                                                                                                                                                                             |
| Who exactly completed the instruments?                                                                                                                | All randomized patients                                                                                                                                                                                                                                                                                                                                                                                     |
| <b>Did the instruments work in the way they were supposed to work - validity?</b>                                                                     |                                                                                                                                                                                                                                                                                                                                                                                                             |
| Had the instruments used been validated previously (provide reference)? Was evidence of prior validation for use in this population presented?        | Cormier JN, et al. Assessment of patient-reported outcomes in patients with melanoma. 2011                                                                                                                                                                                                                                                                                                                  |
| Were the instruments re-validated in this study?                                                                                                      | No                                                                                                                                                                                                                                                                                                                                                                                                          |
| <b>Did the instruments work in the way they were supposed to work – ability to measure</b>                                                            |                                                                                                                                                                                                                                                                                                                                                                                                             |
| Are the PROs able to detect change in patient status, even if those changes are small?                                                                | <i>Consistently smaller proportions of deteriorated and larger proportions of stable or improved GHS/HRQoL and functional and symptoms scales scores were observed for the two pembrolizumab arms compared with the chemotherapy arm. GHS/HRQoL deteriorated by <math>\geq 10</math> points in 7-12% fewer patients in the pembrolizumab arms than in the chemotherapy arm between baseline and week 12</i> |
| <b>Can you make the magnitude of effect (if any) understandable to readers?</b>                                                                       |                                                                                                                                                                                                                                                                                                                                                                                                             |
| Can you provide an estimate of the difference in patients achieving a threshold of function or improvement, and the associated number needed to treat | NA                                                                                                                                                                                                                                                                                                                                                                                                          |

|                                                                                                                                                                                                                                                                |                                                                                                                                                                                                                                                                                                                                                                                                                                                                                                                                                                                                                                         |
|----------------------------------------------------------------------------------------------------------------------------------------------------------------------------------------------------------------------------------------------------------------|-----------------------------------------------------------------------------------------------------------------------------------------------------------------------------------------------------------------------------------------------------------------------------------------------------------------------------------------------------------------------------------------------------------------------------------------------------------------------------------------------------------------------------------------------------------------------------------------------------------------------------------------|
| <b>Article 9</b>                                                                                                                                                                                                                                               | <b>MDX010-20; Ipilimumab with or without gp100 vaccine; Melanoma</b>                                                                                                                                                                                                                                                                                                                                                                                                                                                                                                                                                                    |
| <b>First author &amp; year of publication</b>                                                                                                                                                                                                                  | <b>Revicki, 2012</b>                                                                                                                                                                                                                                                                                                                                                                                                                                                                                                                                                                                                                    |
| <b>Stated purpose of article</b>                                                                                                                                                                                                                               | <i>To summarize the HRQL outcomes during the 12 week treatment induction period of the ipilimumab Phase III clinical trial (MDX010-20)</i>                                                                                                                                                                                                                                                                                                                                                                                                                                                                                              |
| <b>What were PROs measuring?</b>                                                                                                                                                                                                                               |                                                                                                                                                                                                                                                                                                                                                                                                                                                                                                                                                                                                                                         |
| What concepts were the PROs used in the study measuring?                                                                                                                                                                                                       | Health Related Quality of Life                                                                                                                                                                                                                                                                                                                                                                                                                                                                                                                                                                                                          |
| What rationale (if any) for selection of concept or constructs did the authors provide?                                                                                                                                                                        | <i>Assessment of the effects of ipilimumab in relation to overall HRQL is important and will allow oncologists to appropriately educate patients on the risks and benefits of treatment with this agent<br/>Extensive evidence is available supporting the reliability, validity, and responsiveness of the EORTC QLQ-C30 in different cancer populations<br/>We identified three studies that used the EORTC QLQ-C30 comparing treatments for advanced melanoma</i>                                                                                                                                                                    |
| Were patients involved in the selection of outcomes measured by the PROs?                                                                                                                                                                                      | Not reported                                                                                                                                                                                                                                                                                                                                                                                                                                                                                                                                                                                                                            |
| <b>Omissions</b>                                                                                                                                                                                                                                               |                                                                                                                                                                                                                                                                                                                                                                                                                                                                                                                                                                                                                                         |
| Were there any important aspects of health (e.g., symptoms, function, perceptions) or quality of life (e.g. overall evaluation, satisfaction with life) that were omitted in this study from the perspectives of the patient, clinician, significant others... | Treatment-related adverse events – any grade [7]<br><i>Although EORTC QLQ-C30 is an internationally validated, widely used questionnaire for assessing the HRQL in oncology, melanoma specific HRQL questions might not have been addressed.</i>                                                                                                                                                                                                                                                                                                                                                                                        |
| <b>If randomized trials and other studies measured PROs, what were the instruments' measurement strategies?</b>                                                                                                                                                |                                                                                                                                                                                                                                                                                                                                                                                                                                                                                                                                                                                                                                         |
| Did investigators use instruments that yield a single indicator or index number, a profile, or a battery or instruments?                                                                                                                                       | Single instrument; EORTC QLQ-C30                                                                                                                                                                                                                                                                                                                                                                                                                                                                                                                                                                                                        |
| If investigators measure PROs, did they use specific or generic measures, or both?                                                                                                                                                                             | cancer-specific                                                                                                                                                                                                                                                                                                                                                                                                                                                                                                                                                                                                                         |
| Who exactly completed the instruments?                                                                                                                                                                                                                         | All randomized patients                                                                                                                                                                                                                                                                                                                                                                                                                                                                                                                                                                                                                 |
| <b>Did the instruments work in the way they were supposed to work - validity?</b>                                                                                                                                                                              |                                                                                                                                                                                                                                                                                                                                                                                                                                                                                                                                                                                                                                         |
| Had the instruments used been validated previously (provide reference)? Was evidence of prior validation for use in this population presented?                                                                                                                 | Aaronson NK, et al. The European Organization for Research and Treatment of Cancer QLQ-C30: a quality-of-life instrument for use in international clinical trials in oncology. 1993<br>Osoba D, Modification of the EORTC QLQ-C30 (version 2.0) based on content validity and reliability testing in large samples of patients with cancer. The Study Group on Quality of Life of the EORTC and the Symptom Control and Quality of Life Committees of the NCI of Canada Clinical Trials Group. 1997<br>Avril MF, et al. Fotemustine compared with dacarbazine in patients with disseminated malignant melanoma: a phase III study. 2004 |

|                                                                                                                                                                                                                                                                |                                                                                                                                                                                                                                                                                                                                                                                                                                                                                                    |
|----------------------------------------------------------------------------------------------------------------------------------------------------------------------------------------------------------------------------------------------------------------|----------------------------------------------------------------------------------------------------------------------------------------------------------------------------------------------------------------------------------------------------------------------------------------------------------------------------------------------------------------------------------------------------------------------------------------------------------------------------------------------------|
|                                                                                                                                                                                                                                                                | Kiebert GM, et al. Health-related quality of life in patients with advanced metastatic melanoma: results of a randomized phase III study comparing temozolomide with dacarbazine. 2003<br>Sigurdardottir V, et al. Quality of life evaluation by the EORTC questionnaire technique in patients with generalized malignant melanoma on chemotherapy. 1996                                                                                                                                           |
| Were the instruments re-validated in this study?                                                                                                                                                                                                               | No                                                                                                                                                                                                                                                                                                                                                                                                                                                                                                 |
| <b>Did the instruments work in the way they were supposed to work – ability to measure</b>                                                                                                                                                                     |                                                                                                                                                                                                                                                                                                                                                                                                                                                                                                    |
| Are the PROs able to detect change in patient status, even if those changes are small?                                                                                                                                                                         | the PROs did detect changes and the authors reported the changes as no change, minimal or moderate<br><i>The HRQL results for the ipilimumab groups demonstrate that ipilimumab treatment is associated with minimal impairments on functioning and symptoms during the treatment induction period. The only statistically significant difference between ipilimumab and gp100 vaccine was for constipation, and this finding may be due to increased rate of colitis in the ipilimumab groups</i> |
| <b>Can you make the magnitude of effect (if any) understandable to readers?</b>                                                                                                                                                                                |                                                                                                                                                                                                                                                                                                                                                                                                                                                                                                    |
| <b>Can you provide an estimate of the difference in patients achieving a threshold of function or improvement, and the associated number needed to treat</b>                                                                                                   | NA                                                                                                                                                                                                                                                                                                                                                                                                                                                                                                 |
| <b>Article 10</b>                                                                                                                                                                                                                                              |                                                                                                                                                                                                                                                                                                                                                                                                                                                                                                    |
| <b>KEYNOTE-006; Pembrolizumab Q2W vs Pembrolizumab Q3W vs Ipilimumab; Melanoma</b>                                                                                                                                                                             |                                                                                                                                                                                                                                                                                                                                                                                                                                                                                                    |
| <b>First author &amp; year of publication</b>                                                                                                                                                                                                                  | <b>Petrella, 2017</b>                                                                                                                                                                                                                                                                                                                                                                                                                                                                              |
| <b>Stated purpose of article</b>                                                                                                                                                                                                                               | <i>To report results of patient-reported health-related quality of life (HRQoL) and symptoms from phase III KEYNOTE-006 study of pembrolizumab versus ipilimumab in patients with ipilimumab-naive advanced melanoma.</i>                                                                                                                                                                                                                                                                          |
| <b>What were PROs measuring?</b>                                                                                                                                                                                                                               |                                                                                                                                                                                                                                                                                                                                                                                                                                                                                                    |
| What concepts were the PROs used in the study measuring?                                                                                                                                                                                                       | HRQoL and symptoms                                                                                                                                                                                                                                                                                                                                                                                                                                                                                 |
| What rationale (if any) for selection of concept or constructs did the authors provide?                                                                                                                                                                        | <i>Patient-reported outcomes (PROs) are increasingly used as a complement to biological data to inform patient-centred care and clinical decision-making. Indeed, research has indicated that health-related quality of life (HRQoL) impairment may affect the survival rate of patients with melanoma</i>                                                                                                                                                                                         |
| Were patients involved in the selection of outcomes measured by the PROs?                                                                                                                                                                                      | Not reported                                                                                                                                                                                                                                                                                                                                                                                                                                                                                       |
| <b>Omissions</b>                                                                                                                                                                                                                                               |                                                                                                                                                                                                                                                                                                                                                                                                                                                                                                    |
| Were there any important aspects of health (e.g., symptoms, function, perceptions) or quality of life (e.g. overall evaluation, satisfaction with life) that were omitted in this study from the perspectives of the patient, clinician, significant others... | Treatment-related adverse events – any grade [8]                                                                                                                                                                                                                                                                                                                                                                                                                                                   |
| <b>If randomized trials and other studies measured PROs, what were the instruments' measurement strategies?</b>                                                                                                                                                |                                                                                                                                                                                                                                                                                                                                                                                                                                                                                                    |
| Did investigators use instruments that yield a single indicator or index number, a profile, or a battery of instruments?                                                                                                                                       | battery of instruments: EQ-5D-3L and EQ-5D VAS; EORTC QLQ-C30                                                                                                                                                                                                                                                                                                                                                                                                                                      |
| If investigators measure PROs, did they use specific or generic measures, or both?                                                                                                                                                                             | Both: General health status, Cancer-specific                                                                                                                                                                                                                                                                                                                                                                                                                                                       |
| Who exactly completed the instruments?                                                                                                                                                                                                                         | All randomized patients                                                                                                                                                                                                                                                                                                                                                                                                                                                                            |
| <b>Did the instruments work in the way they were supposed to work - validity?</b>                                                                                                                                                                              |                                                                                                                                                                                                                                                                                                                                                                                                                                                                                                    |
| Had the instruments used been validated previously (provide reference)? Was evidence of prior validation for use in this population presented?                                                                                                                 | Refers to the HRQoL results of the following studies: EORTC 18071, CheckMate 067, Keynote-002, measured by the EORTC QLQ-C30<br>Aronson NK, et al. The European Organization for Research and Treatment of Cancer QLQ-C30: a quality-of-life instrument for use in international clinical trials in oncology. J Natl Cancer Inst 1993<br>The EuroQol Group. EuroQolea new facility for the measurement of health-related quality of life. Health Policy 1990                                       |
| Were the instruments re-validated in this study?                                                                                                                                                                                                               | No                                                                                                                                                                                                                                                                                                                                                                                                                                                                                                 |
| <b>Did the instruments work in the way they were supposed to work – ability to measure</b>                                                                                                                                                                     |                                                                                                                                                                                                                                                                                                                                                                                                                                                                                                    |
| Are the PROs able to detect change in patient status, even if those changes are small?                                                                                                                                                                         | <i>In the two pembrolizumab arms, the least squares mean for EORTC QLQ-C30 GHS/QoL score changes from baseline to week 12 were minimal. For the ipilimumab arm, there was a clinically meaningful -10.0 point change<br/>A statistically significant difference in the EQ-5D utility scores was observed between both pembrolizumab arms and the ipilimumab arm. No differences in the results of EORTC QLQ-C30 and EQ-5D were observed between the two pembrolizumab schedules.</i>               |
| <b>Can you make the magnitude of effect (if any) understandable to readers?</b>                                                                                                                                                                                |                                                                                                                                                                                                                                                                                                                                                                                                                                                                                                    |

|                                                                                                                                                                                                                                                                |                                                                                                                                                                                                                                                                                                                                                                                                                                                                                                                                                                                                                                                                                                                                                                                                                                                                                                                                                                                                                                                                                                                                                                                                                                                                                                                                                                                                                                                                                     |
|----------------------------------------------------------------------------------------------------------------------------------------------------------------------------------------------------------------------------------------------------------------|-------------------------------------------------------------------------------------------------------------------------------------------------------------------------------------------------------------------------------------------------------------------------------------------------------------------------------------------------------------------------------------------------------------------------------------------------------------------------------------------------------------------------------------------------------------------------------------------------------------------------------------------------------------------------------------------------------------------------------------------------------------------------------------------------------------------------------------------------------------------------------------------------------------------------------------------------------------------------------------------------------------------------------------------------------------------------------------------------------------------------------------------------------------------------------------------------------------------------------------------------------------------------------------------------------------------------------------------------------------------------------------------------------------------------------------------------------------------------------------|
| Can you provide an estimate of the difference in patients achieving a threshold of function or improvement, and the associated number needed to treat                                                                                                          | NA                                                                                                                                                                                                                                                                                                                                                                                                                                                                                                                                                                                                                                                                                                                                                                                                                                                                                                                                                                                                                                                                                                                                                                                                                                                                                                                                                                                                                                                                                  |
| <b>Article 11</b>                                                                                                                                                                                                                                              | <b>KEYNOTE-024; Pembrolizumab vs Chemotherapy; Non-small-cell lung cancer</b>                                                                                                                                                                                                                                                                                                                                                                                                                                                                                                                                                                                                                                                                                                                                                                                                                                                                                                                                                                                                                                                                                                                                                                                                                                                                                                                                                                                                       |
| <b>First author &amp; year of publication</b>                                                                                                                                                                                                                  | <b>Brahmer, 2017</b>                                                                                                                                                                                                                                                                                                                                                                                                                                                                                                                                                                                                                                                                                                                                                                                                                                                                                                                                                                                                                                                                                                                                                                                                                                                                                                                                                                                                                                                                |
| <b>Stated purpose of article</b>                                                                                                                                                                                                                               | <i>We report the effect of pembrolizumab versus chemotherapy on patient-reported outcomes (PROs), evaluated as prespecified exploratory endpoints, in the KEYNOTE-024 study.</i>                                                                                                                                                                                                                                                                                                                                                                                                                                                                                                                                                                                                                                                                                                                                                                                                                                                                                                                                                                                                                                                                                                                                                                                                                                                                                                    |
| <b>What were PROs measuring?</b>                                                                                                                                                                                                                               |                                                                                                                                                                                                                                                                                                                                                                                                                                                                                                                                                                                                                                                                                                                                                                                                                                                                                                                                                                                                                                                                                                                                                                                                                                                                                                                                                                                                                                                                                     |
| What concepts were the PROs used in the study measuring?                                                                                                                                                                                                       | HRQoL and symptoms                                                                                                                                                                                                                                                                                                                                                                                                                                                                                                                                                                                                                                                                                                                                                                                                                                                                                                                                                                                                                                                                                                                                                                                                                                                                                                                                                                                                                                                                  |
| What rationale (if any) for selection of concept or constructs did the authors provide?                                                                                                                                                                        | <i>Patients with advanced NSCLC have a high burden of symptoms, such as fatigue, cough, dyspnoea, anorexia, weight loss, and pain that can have a substantial negative effect on health-related quality of life (HRQOL) and functioning. Therefore, the effect of novel treatments on symptom control and HRQOL needs to be considered alongside survival.</i>                                                                                                                                                                                                                                                                                                                                                                                                                                                                                                                                                                                                                                                                                                                                                                                                                                                                                                                                                                                                                                                                                                                      |
| Were patients involved in the selection of outcomes measured by the PROs?                                                                                                                                                                                      | Not reported                                                                                                                                                                                                                                                                                                                                                                                                                                                                                                                                                                                                                                                                                                                                                                                                                                                                                                                                                                                                                                                                                                                                                                                                                                                                                                                                                                                                                                                                        |
| <b>Omissions</b>                                                                                                                                                                                                                                               |                                                                                                                                                                                                                                                                                                                                                                                                                                                                                                                                                                                                                                                                                                                                                                                                                                                                                                                                                                                                                                                                                                                                                                                                                                                                                                                                                                                                                                                                                     |
| Were there any important aspects of health (e.g., symptoms, function, perceptions) or quality of life (e.g. overall evaluation, satisfaction with life) that were omitted in this study from the perspectives of the patient, clinician, significant others... | Treatment-related adverse events – any grade [9]<br><i>The use of QOL instruments that were developed in the chemotherapy era, and might thus not adequately reflect the experiences of patients receiving therapies developed since then, could also be considered a limitation. However, although the QLQ-C30 and QLQ-LC13 questionnaires were not developed specifically for use with immunotherapies, they do remain in large part applicable because they capture key symptoms across both treatment groups (eg, fatigue and gastrointestinal symptoms). Immunotherapy-associated symptoms (eg, pruritus, pneumonitis) are not considered by these instruments, but were captured by clinicians using Common Terminology Criteria for Adverse Events version 4.0</i>                                                                                                                                                                                                                                                                                                                                                                                                                                                                                                                                                                                                                                                                                                           |
| <b>If randomized trials and other studies measured PROs, what were the instruments' measurement strategies?</b>                                                                                                                                                |                                                                                                                                                                                                                                                                                                                                                                                                                                                                                                                                                                                                                                                                                                                                                                                                                                                                                                                                                                                                                                                                                                                                                                                                                                                                                                                                                                                                                                                                                     |
| Did investigators use instruments that yield a single indicator or index number, a profile, or a battery or instruments?                                                                                                                                       | Battery of instruments: EORTC QLQ-C30; EORTC QLQ-LC13; EQ-5D-3L and EQ-5D VAS                                                                                                                                                                                                                                                                                                                                                                                                                                                                                                                                                                                                                                                                                                                                                                                                                                                                                                                                                                                                                                                                                                                                                                                                                                                                                                                                                                                                       |
| If investigators measure PROs, did they use specific or generic measures, or both?                                                                                                                                                                             | Cancer-specific; Disease-specific; General health                                                                                                                                                                                                                                                                                                                                                                                                                                                                                                                                                                                                                                                                                                                                                                                                                                                                                                                                                                                                                                                                                                                                                                                                                                                                                                                                                                                                                                   |
| Who exactly completed the instruments?                                                                                                                                                                                                                         | All randomized patients                                                                                                                                                                                                                                                                                                                                                                                                                                                                                                                                                                                                                                                                                                                                                                                                                                                                                                                                                                                                                                                                                                                                                                                                                                                                                                                                                                                                                                                             |
| <b>Did the instruments work in the way they were supposed to work - validity?</b>                                                                                                                                                                              |                                                                                                                                                                                                                                                                                                                                                                                                                                                                                                                                                                                                                                                                                                                                                                                                                                                                                                                                                                                                                                                                                                                                                                                                                                                                                                                                                                                                                                                                                     |
| Had the instruments used been validated previously (provide reference)? Was evidence of prior validation for use in this population presented?                                                                                                                 | <i>The QLQ-C30 and QLQ-LC13 questionnaires have been validated for use in patients with a variety of cancer diagnoses, including lung cancer. The EQ-5D-3L instrument is used to calculate a health index score, and a visual analogue scale that patients use to rate their current general health status (GHS)</i><br>Aaronson NK, et al. The European Organization for Research and Treatment of Cancer QLQ-C30: a quality-of-life instrument for use in international clinical trials in oncology. 1993<br>Osoba D, et al. Interpreting the significance of changes in health-related quality-of-life scores. 1998<br>Bergman B, et al. The EORTC QLQ-LC13: a modular supplement to the EORTC Core Quality of Life Questionnaire (QLQ-C30) for use in lung cancer clinical trials. EORTC Study Group on Quality of Life. 1994<br>Hjermstad MJ, et al. Test/retest study of the European organization for Research and Treatment of Cancer Core Quality-of-Life Questionnaire. 1995<br>Osoba D, et al. Psychometric properties and responsiveness of the EORTC quality of life questionnaire (QLQ-C30) in patients with breast, ovarian and lung cancer. 1994<br>Ringdal GI, et al. Testing the EORTC Quality of Life Questionnaire on cancer patients with heterogenous diagnoses. 1993<br>Velikova G, et al. Health-related Quality of Life in EORTC clinical trials-30 years of progress from methodological developments to making a real impact on oncology practice. 2017. |
| Were the instruments re-validated in this study?                                                                                                                                                                                                               | No                                                                                                                                                                                                                                                                                                                                                                                                                                                                                                                                                                                                                                                                                                                                                                                                                                                                                                                                                                                                                                                                                                                                                                                                                                                                                                                                                                                                                                                                                  |
| <b>Did the instruments work in the way they were supposed to work – ability to measure</b>                                                                                                                                                                     |                                                                                                                                                                                                                                                                                                                                                                                                                                                                                                                                                                                                                                                                                                                                                                                                                                                                                                                                                                                                                                                                                                                                                                                                                                                                                                                                                                                                                                                                                     |
| Are the PROs able to detect change in patient status, even if those changes are small?                                                                                                                                                                         | <i>Pembrolizumab was associated with a clinically meaningful improvement in HRQOL compared with that for platinum-based chemotherapy as first-line treatment in patient with metastatic NSCLC and a PD-L1 tumour proportion score of 50% or more. At 15 weeks, GHS/QOL score on the QLQ-C30 for pembrolizumab was significantly different from that for chemotherapy. No significant difference was found in EQ-5D-3L visual analogue scale score by week 15 between the two treatment groups</i>                                                                                                                                                                                                                                                                                                                                                                                                                                                                                                                                                                                                                                                                                                                                                                                                                                                                                                                                                                                   |
| <b>Can you make the magnitude of effect (if any) understandable to readers?</b>                                                                                                                                                                                |                                                                                                                                                                                                                                                                                                                                                                                                                                                                                                                                                                                                                                                                                                                                                                                                                                                                                                                                                                                                                                                                                                                                                                                                                                                                                                                                                                                                                                                                                     |

|                                                                                                                                                       |    |
|-------------------------------------------------------------------------------------------------------------------------------------------------------|----|
| Can you provide an estimate of the difference in patients achieving a threshold of function or improvement, and the associated number needed to treat | NA |
|-------------------------------------------------------------------------------------------------------------------------------------------------------|----|

|                                                                                                                                                                                                                                                                |                                                                                                                                                                                                                                                                                                                                                                                                                                                                                                                                                                                                                                                                                                                                                                                                                                                                                                                                                                                                                                                                                                                                                                                                                                                                                                                                                                                                                                                                                                                                                                                                                            |
|----------------------------------------------------------------------------------------------------------------------------------------------------------------------------------------------------------------------------------------------------------------|----------------------------------------------------------------------------------------------------------------------------------------------------------------------------------------------------------------------------------------------------------------------------------------------------------------------------------------------------------------------------------------------------------------------------------------------------------------------------------------------------------------------------------------------------------------------------------------------------------------------------------------------------------------------------------------------------------------------------------------------------------------------------------------------------------------------------------------------------------------------------------------------------------------------------------------------------------------------------------------------------------------------------------------------------------------------------------------------------------------------------------------------------------------------------------------------------------------------------------------------------------------------------------------------------------------------------------------------------------------------------------------------------------------------------------------------------------------------------------------------------------------------------------------------------------------------------------------------------------------------------|
| <b>Article 12</b>                                                                                                                                                                                                                                              | <b>CheckMate 066; Nivolumab vs Dacarbazine; Melanoma</b>                                                                                                                                                                                                                                                                                                                                                                                                                                                                                                                                                                                                                                                                                                                                                                                                                                                                                                                                                                                                                                                                                                                                                                                                                                                                                                                                                                                                                                                                                                                                                                   |
| <b>First author &amp; year of publication</b>                                                                                                                                                                                                                  | <b>Long, 2016</b>                                                                                                                                                                                                                                                                                                                                                                                                                                                                                                                                                                                                                                                                                                                                                                                                                                                                                                                                                                                                                                                                                                                                                                                                                                                                                                                                                                                                                                                                                                                                                                                                          |
| <b>Stated purpose of article</b>                                                                                                                                                                                                                               | <i>Herein are presented results of prospectively collected analyses in CheckMate 066 that compared the impact of nivolumab and dacarbazine on HRQoL using reliable and validated patient-reported outcomes (PROs).</i>                                                                                                                                                                                                                                                                                                                                                                                                                                                                                                                                                                                                                                                                                                                                                                                                                                                                                                                                                                                                                                                                                                                                                                                                                                                                                                                                                                                                     |
| <b>What were PROs measuring?</b>                                                                                                                                                                                                                               |                                                                                                                                                                                                                                                                                                                                                                                                                                                                                                                                                                                                                                                                                                                                                                                                                                                                                                                                                                                                                                                                                                                                                                                                                                                                                                                                                                                                                                                                                                                                                                                                                            |
| What concepts were the PROs used in the study measuring?                                                                                                                                                                                                       | HRQoL                                                                                                                                                                                                                                                                                                                                                                                                                                                                                                                                                                                                                                                                                                                                                                                                                                                                                                                                                                                                                                                                                                                                                                                                                                                                                                                                                                                                                                                                                                                                                                                                                      |
| What rationale (if any) for selection of concept or constructs did the authors provide?                                                                                                                                                                        | <i>A frequent concern with immunotherapies is that their toxicity profile might diminish health-related quality of life (HRQoL), even when meaningful disease outcomes are observed. Given the increasing importance of considering HRQoL during treatment decision-making in oncology, the CheckMate 066 study incorporated these measures.</i>                                                                                                                                                                                                                                                                                                                                                                                                                                                                                                                                                                                                                                                                                                                                                                                                                                                                                                                                                                                                                                                                                                                                                                                                                                                                           |
| Were patients involved in the selection of outcomes measured by the PROs?                                                                                                                                                                                      | Not reported                                                                                                                                                                                                                                                                                                                                                                                                                                                                                                                                                                                                                                                                                                                                                                                                                                                                                                                                                                                                                                                                                                                                                                                                                                                                                                                                                                                                                                                                                                                                                                                                               |
| <b>Omissions</b>                                                                                                                                                                                                                                               |                                                                                                                                                                                                                                                                                                                                                                                                                                                                                                                                                                                                                                                                                                                                                                                                                                                                                                                                                                                                                                                                                                                                                                                                                                                                                                                                                                                                                                                                                                                                                                                                                            |
| Were there any important aspects of health (e.g., symptoms, function, perceptions) or quality of life (e.g. overall evaluation, satisfaction with life) that were omitted in this study from the perspectives of the patient, clinician, significant others... | Treatment-related adverse events – any grade [10]                                                                                                                                                                                                                                                                                                                                                                                                                                                                                                                                                                                                                                                                                                                                                                                                                                                                                                                                                                                                                                                                                                                                                                                                                                                                                                                                                                                                                                                                                                                                                                          |
| <b>If randomized trials and other studies measured PROs, what were the instruments' measurement strategies?</b>                                                                                                                                                |                                                                                                                                                                                                                                                                                                                                                                                                                                                                                                                                                                                                                                                                                                                                                                                                                                                                                                                                                                                                                                                                                                                                                                                                                                                                                                                                                                                                                                                                                                                                                                                                                            |
| Did investigators use instruments that yield a single indicator or index number, a profile, or a battery of instruments?                                                                                                                                       | battery of instruments: EQ-5D-3L and EQ-5D VAS; EORTC QLQ-C30                                                                                                                                                                                                                                                                                                                                                                                                                                                                                                                                                                                                                                                                                                                                                                                                                                                                                                                                                                                                                                                                                                                                                                                                                                                                                                                                                                                                                                                                                                                                                              |
| If investigators measure PROs, did they use specific or generic measures, or both?                                                                                                                                                                             | Both: General health; Cancer-specific                                                                                                                                                                                                                                                                                                                                                                                                                                                                                                                                                                                                                                                                                                                                                                                                                                                                                                                                                                                                                                                                                                                                                                                                                                                                                                                                                                                                                                                                                                                                                                                      |
| Who exactly completed the instruments?                                                                                                                                                                                                                         | all randomized patients during on-study and follow-up phases                                                                                                                                                                                                                                                                                                                                                                                                                                                                                                                                                                                                                                                                                                                                                                                                                                                                                                                                                                                                                                                                                                                                                                                                                                                                                                                                                                                                                                                                                                                                                               |
| <b>Did the instruments work in the way they were supposed to work - validity?</b>                                                                                                                                                                              |                                                                                                                                                                                                                                                                                                                                                                                                                                                                                                                                                                                                                                                                                                                                                                                                                                                                                                                                                                                                                                                                                                                                                                                                                                                                                                                                                                                                                                                                                                                                                                                                                            |
| Had the instruments used been validated previously (provide reference)? Was evidence of prior validation for use in this population presented?                                                                                                                 | <i>HRQoL was evaluated using the EORTC QLQ-C30 and the EQ-5D-3L, two PROs whose use has been well documented in advanced melanoma. The study used PROs that were not developed and validated specifically for melanoma. However, given their common use in melanoma clinical trials, these instruments were considered to be the most content valid among those currently available</i><br>Cornish D, et al. A systematic review of health-related quality of life in cutaneous melanoma. 2009<br>Askew RL, et al. Mapping FACT-melanoma quality-of-life scores to EQ-5D health utility weights. 2011.<br>Revicki DA, et al. Health related quality of life outcomes for unresectable stage III or IV melanoma patients receiving ipilimumab treatment. 2012<br>Grob JJ, et al. Patient perception of the benefit of a BRAF inhibitor in metastatic melanoma: quality-of-life analyses of the BREAK-3 study comparing dabrafenib with dacarbazine. 2014<br>Schadendorf D, et al. Functional and symptom impact of trametinib versus chemotherapy in BRAF V600E advanced or metastatic melanoma: quality-of-life analyses of the METRIC study. 2014<br>Schadendorf D, et al. Health-related quality of life impact in a randomised phase III study of the combination of dabrafenib and trametinib versus dabrafenib monotherapy in patients with BRAF V600 metastatic melanoma. 2015<br>Schadendorf D, et al. Patient-reported outcomes (PROs) in KEYNOTE-002, a randomized study of pembrolizumab vs chemotherapy in patients (pts) with ipilimumab-refractory (IPI-R) metastatic melanoma (MEL). 2015, ASCO Poster 9040. |
| Were the instruments re-validated in this study?                                                                                                                                                                                                               | No                                                                                                                                                                                                                                                                                                                                                                                                                                                                                                                                                                                                                                                                                                                                                                                                                                                                                                                                                                                                                                                                                                                                                                                                                                                                                                                                                                                                                                                                                                                                                                                                                         |
| <b>Did the instruments work in the way they were supposed to work – ability to measure</b>                                                                                                                                                                     |                                                                                                                                                                                                                                                                                                                                                                                                                                                                                                                                                                                                                                                                                                                                                                                                                                                                                                                                                                                                                                                                                                                                                                                                                                                                                                                                                                                                                                                                                                                                                                                                                            |
| Are the PROs able to detect change in patient status, even if those changes are small?                                                                                                                                                                         | <i>In general, both EORTC QLQ-C30 functioning subscale and symptom mean scores remained relatively stable over time compared with baseline for both groups, with a few statistically significant and clinically meaningful changes.</i><br><b>EQ-5D:</b> <i>The only significant difference observed between treatment arms was at week 7. Clinically meaningful improvements occurred in patients treated with nivolumab.</i><br><b>EQ-5D VAS:</b> <i>Significant improvements from baseline were observed for patients receiving nivolumab. Clinically meaningful improvements were noted for nivolumab patients. No significant or clinically meaningful improvements from baseline were observed for dacarbazine patients.</i>                                                                                                                                                                                                                                                                                                                                                                                                                                                                                                                                                                                                                                                                                                                                                                                                                                                                                         |
| <b>Can you make the magnitude of effect (if any) understandable to readers?</b>                                                                                                                                                                                |                                                                                                                                                                                                                                                                                                                                                                                                                                                                                                                                                                                                                                                                                                                                                                                                                                                                                                                                                                                                                                                                                                                                                                                                                                                                                                                                                                                                                                                                                                                                                                                                                            |

|                                                                                                                                                       |    |
|-------------------------------------------------------------------------------------------------------------------------------------------------------|----|
| Can you provide an estimate of the difference in patients achieving a threshold of function or improvement, and the associated number needed to treat | NA |
|-------------------------------------------------------------------------------------------------------------------------------------------------------|----|

|                                                                                                                                                                                                                                                                |                                                                                                                                                                                                                                                                                                                                                                                                                                                                                                                                                                                                                                                                                                                                                                                                                                                                                                                                                                                                                                                                                                                                                                                                                           |
|----------------------------------------------------------------------------------------------------------------------------------------------------------------------------------------------------------------------------------------------------------------|---------------------------------------------------------------------------------------------------------------------------------------------------------------------------------------------------------------------------------------------------------------------------------------------------------------------------------------------------------------------------------------------------------------------------------------------------------------------------------------------------------------------------------------------------------------------------------------------------------------------------------------------------------------------------------------------------------------------------------------------------------------------------------------------------------------------------------------------------------------------------------------------------------------------------------------------------------------------------------------------------------------------------------------------------------------------------------------------------------------------------------------------------------------------------------------------------------------------------|
| <b>Article 13</b>                                                                                                                                                                                                                                              | <b>KEYNOTE-010; Pembrolizumab vs Docetaxel; PD-L1–Expressing NSCLC</b>                                                                                                                                                                                                                                                                                                                                                                                                                                                                                                                                                                                                                                                                                                                                                                                                                                                                                                                                                                                                                                                                                                                                                    |
| <b>First author &amp; year of publication</b>                                                                                                                                                                                                                  | Barlesi, 2019                                                                                                                                                                                                                                                                                                                                                                                                                                                                                                                                                                                                                                                                                                                                                                                                                                                                                                                                                                                                                                                                                                                                                                                                             |
| <b>Stated purpose of article</b>                                                                                                                                                                                                                               | The effects of pembrolizumab and docetaxel on HRQoL were evaluated in the present study                                                                                                                                                                                                                                                                                                                                                                                                                                                                                                                                                                                                                                                                                                                                                                                                                                                                                                                                                                                                                                                                                                                                   |
| <b>What were PROs measuring?</b>                                                                                                                                                                                                                               |                                                                                                                                                                                                                                                                                                                                                                                                                                                                                                                                                                                                                                                                                                                                                                                                                                                                                                                                                                                                                                                                                                                                                                                                                           |
| What concepts were the PROs used in the study measuring?                                                                                                                                                                                                       | HRQoL                                                                                                                                                                                                                                                                                                                                                                                                                                                                                                                                                                                                                                                                                                                                                                                                                                                                                                                                                                                                                                                                                                                                                                                                                     |
| What rationale (if any) for selection of concept or constructs did the authors provide?                                                                                                                                                                        | <i>In addition to efficacy, the tolerability of treatment and impact on health-related quality of life (HRQoL) are very important considerations for patients with cancer.</i>                                                                                                                                                                                                                                                                                                                                                                                                                                                                                                                                                                                                                                                                                                                                                                                                                                                                                                                                                                                                                                            |
| Were patients involved in the selection of outcomes measured by the PROs?                                                                                                                                                                                      | Not reported                                                                                                                                                                                                                                                                                                                                                                                                                                                                                                                                                                                                                                                                                                                                                                                                                                                                                                                                                                                                                                                                                                                                                                                                              |
| <b>Omissions</b>                                                                                                                                                                                                                                               |                                                                                                                                                                                                                                                                                                                                                                                                                                                                                                                                                                                                                                                                                                                                                                                                                                                                                                                                                                                                                                                                                                                                                                                                                           |
| Were there any important aspects of health (e.g., symptoms, function, perceptions) or quality of life (e.g. overall evaluation, satisfaction with life) that were omitted in this study from the perspectives of the patient, clinician, significant others... | Treatment-related adverse events – any grade [11]                                                                                                                                                                                                                                                                                                                                                                                                                                                                                                                                                                                                                                                                                                                                                                                                                                                                                                                                                                                                                                                                                                                                                                         |
| <b>If randomized trials and other studies measured PROs, what were the instruments' measurement strategies?</b>                                                                                                                                                |                                                                                                                                                                                                                                                                                                                                                                                                                                                                                                                                                                                                                                                                                                                                                                                                                                                                                                                                                                                                                                                                                                                                                                                                                           |
| Did investigators use instruments that yield a single indicator or index number, a profile, or a battery or instruments?                                                                                                                                       | Battery of instruments: EQ-5D-3L; EORTC QLQ-C30 and EORTC-LC13                                                                                                                                                                                                                                                                                                                                                                                                                                                                                                                                                                                                                                                                                                                                                                                                                                                                                                                                                                                                                                                                                                                                                            |
| If investigators measure PROs, did they use specific or generic measures, or both?                                                                                                                                                                             | Both: global health status; time to deterioration; composite endpoint of cough; dyspnea; chest pain                                                                                                                                                                                                                                                                                                                                                                                                                                                                                                                                                                                                                                                                                                                                                                                                                                                                                                                                                                                                                                                                                                                       |
| Who exactly completed the instruments?                                                                                                                                                                                                                         | <i>The HRQoL instruments were administered electronically by trained personnel and completed by the patients themselves: all randomized patients who received at least one dose of study medication</i>                                                                                                                                                                                                                                                                                                                                                                                                                                                                                                                                                                                                                                                                                                                                                                                                                                                                                                                                                                                                                   |
| <b>Did the instruments work in the way they were supposed to work - validity?</b>                                                                                                                                                                              |                                                                                                                                                                                                                                                                                                                                                                                                                                                                                                                                                                                                                                                                                                                                                                                                                                                                                                                                                                                                                                                                                                                                                                                                                           |
| Had the instruments used been validated previously (provide reference)? Was evidence of prior validation for use in this population presented?                                                                                                                 | <i>The effects of pembrolizumab and docetaxel on HRQoL were evaluated in the present study using three patient- reported outcomes (PRO) instruments that have been widely used in phase III NSCLC trials</i><br>Aaronson NK, et al. The European Organization for Research and Treatment of Cancer QLQ-C30: a quality-of-life instrument for use in international clinical trials in oncology. J Natl Cancer Inst. 1993.<br>Bergman B, et al. The EORTC QLQ-LC13: a modular supplement to the EORTC Core Quality of Life Questionnaire (QLQ- C30) for use in lung cancer clinical trials. EORTC Study Group on Quality of Life. Eur J Cancer. 1994.<br>The EuroQol Group. EuroQol—a new facility for the measurement of health-related quality of life. Health Policy. 1990.<br>Brooks R. EuroQol: the current state of play. Health Policy. 1996<br>Shaw AT, et al Crizotinib versus chemotherapy in advanced ALK-positive lung cancer. N Engl J Med. 2013.<br>Blackhall F, et al. Patient-reported outcomes and quality of life in PROFILE 1007: a randomized trial of crizotinib compared with chemotherapy in previously treated patients with ALK-positive advanced non-small-cell lung cancer. J Thorac Oncol. 2014 |
| Were the instruments re-validated in this study?                                                                                                                                                                                                               | No                                                                                                                                                                                                                                                                                                                                                                                                                                                                                                                                                                                                                                                                                                                                                                                                                                                                                                                                                                                                                                                                                                                                                                                                                        |
| <b>Did the instruments work in the way they were supposed to work – ability to measure</b>                                                                                                                                                                     |                                                                                                                                                                                                                                                                                                                                                                                                                                                                                                                                                                                                                                                                                                                                                                                                                                                                                                                                                                                                                                                                                                                                                                                                                           |
| Are the PROs able to detect change in patient status, even if those changes are small?                                                                                                                                                                         | <i>findings suggest that HRQoL and symptoms were either maintained or improved to a greater degree with 2 mg/kg pembrolizumab than with docetaxel in this population of patients with previously treated, PD-L1–expressing (TPS &gt;=1%) advanced NSCLC</i>                                                                                                                                                                                                                                                                                                                                                                                                                                                                                                                                                                                                                                                                                                                                                                                                                                                                                                                                                               |
| <b>Can you make the magnitude of effect (if any) understandable to readers?</b>                                                                                                                                                                                |                                                                                                                                                                                                                                                                                                                                                                                                                                                                                                                                                                                                                                                                                                                                                                                                                                                                                                                                                                                                                                                                                                                                                                                                                           |
| Can you provide an estimate of the difference in patients achieving a threshold of function or improvement, and the associated number needed to treat                                                                                                          | NA                                                                                                                                                                                                                                                                                                                                                                                                                                                                                                                                                                                                                                                                                                                                                                                                                                                                                                                                                                                                                                                                                                                                                                                                                        |

|                                               |                                                                             |
|-----------------------------------------------|-----------------------------------------------------------------------------|
| <b>Article 14</b>                             | <b>OAK; Atezolizumab vs Docetaxel ; Advanced Non-Small-cell Lung Cancer</b> |
| <b>First author &amp; year of publication</b> | Bordoni, 2018                                                               |

|                                                                                                                                                                                                                                                                |                                                                                                                                                                                                                                                                                                                                                                                                                                                                                                                                                                                                                                                                                                                            |
|----------------------------------------------------------------------------------------------------------------------------------------------------------------------------------------------------------------------------------------------------------------|----------------------------------------------------------------------------------------------------------------------------------------------------------------------------------------------------------------------------------------------------------------------------------------------------------------------------------------------------------------------------------------------------------------------------------------------------------------------------------------------------------------------------------------------------------------------------------------------------------------------------------------------------------------------------------------------------------------------------|
| <b>Stated purpose of article</b>                                                                                                                                                                                                                               | <i>PRO data were collected to determine the relative effect of atezolizumab and docetaxel on symptom burden, patient functioning, and HRQoL in patients with previously treated, advanced NSCLC</i>                                                                                                                                                                                                                                                                                                                                                                                                                                                                                                                        |
| <b>What were PROs measuring?</b>                                                                                                                                                                                                                               |                                                                                                                                                                                                                                                                                                                                                                                                                                                                                                                                                                                                                                                                                                                            |
| What concepts were the PROs used in the study measuring?                                                                                                                                                                                                       | Symptom burden, patient functioning, and HRQoL                                                                                                                                                                                                                                                                                                                                                                                                                                                                                                                                                                                                                                                                             |
| What rationale (if any) for selection of concept or constructs did the authors provide?                                                                                                                                                                        | <i>In lung cancer, worsening of cancer-related symptoms, not only adversely affects patients' HRQoL, but has also been shown to correlate with a lower response to treatment and might be associated with reduced OS. Similarly, research has shown that both physical functioning and patient-reported pain were predictive of survival and could be considered collectively as part of the evaluation of a treatment's benefit/risk profile in NSCLC.</i>                                                                                                                                                                                                                                                                |
| Were patients involved in the selection of outcomes measured by the PROs?                                                                                                                                                                                      | Not reported                                                                                                                                                                                                                                                                                                                                                                                                                                                                                                                                                                                                                                                                                                               |
| <b>Omissions</b>                                                                                                                                                                                                                                               |                                                                                                                                                                                                                                                                                                                                                                                                                                                                                                                                                                                                                                                                                                                            |
| Were there any important aspects of health (e.g., symptoms, function, perceptions) or quality of life (e.g. overall evaluation, satisfaction with life) that were omitted in this study from the perspectives of the patient, clinician, significant others... | Treatment-related adverse events – any grade [12]                                                                                                                                                                                                                                                                                                                                                                                                                                                                                                                                                                                                                                                                          |
| <b>If randomized trials and other studies measured PROs, what were the instruments' measurement strategies?</b>                                                                                                                                                |                                                                                                                                                                                                                                                                                                                                                                                                                                                                                                                                                                                                                                                                                                                            |
| Did investigators use instruments that yield a single indicator or index number, a profile, or a battery or instruments?                                                                                                                                       | Battery: EORTC-QLQ-C30 and EORTC-LC13                                                                                                                                                                                                                                                                                                                                                                                                                                                                                                                                                                                                                                                                                      |
| If investigators measure PROs, did they use specific or generic measures, or both?                                                                                                                                                                             | Cancer-specific; Disease-specific                                                                                                                                                                                                                                                                                                                                                                                                                                                                                                                                                                                                                                                                                          |
| Who exactly completed the instruments?                                                                                                                                                                                                                         | patients                                                                                                                                                                                                                                                                                                                                                                                                                                                                                                                                                                                                                                                                                                                   |
| <b>Did the instruments work in the way they were supposed to work - validity?</b>                                                                                                                                                                              |                                                                                                                                                                                                                                                                                                                                                                                                                                                                                                                                                                                                                                                                                                                            |
| Had the instruments used been validated previously (provide reference)? Was evidence of prior validation for use in this population presented?                                                                                                                 | <i>The PROs reflecting lung cancer symptoms, commonly reported treatment-related symptoms (eg, nausea, constipation), functioning in daily life, and HRQoL were collected using 2 self-administered questionnaires that have been routinely used in lung cancer studies</i><br>Aronson NK, et al. The European Organization for Research and Treatment of Cancer QLQ-C30: a quality of life instrument for use in international clinical trials in oncology. <i>J Natl Cancer Inst</i> 1993<br>Bergman B, et al. The EORTC QLQ-LC13: a modular supplement to the EORTC core quality of life questionnaire (QLQ-C30) for use in lung cancer clinical trials. EORTC Study Group on Quality of Life. <i>Eur J Cancer</i> 1994 |
| Were the instruments re-validated in this study?                                                                                                                                                                                                               | No                                                                                                                                                                                                                                                                                                                                                                                                                                                                                                                                                                                                                                                                                                                         |
| <b>Did the instruments work in the way they were supposed to work – ability to measure</b>                                                                                                                                                                     |                                                                                                                                                                                                                                                                                                                                                                                                                                                                                                                                                                                                                                                                                                                            |
| Are the PROs able to detect change in patient status, even if those changes are small?                                                                                                                                                                         | <i>PRO data from the phase III OAK study have indicated that atezolizumab prolongs the time until patients with advanced NSCLC experience limitations in performing their day-to-day activities (physical function and role function) and improves patient HRQoL compared with docetaxel</i>                                                                                                                                                                                                                                                                                                                                                                                                                               |
| <b>Can you make the magnitude of effect (if any) understandable to readers?</b>                                                                                                                                                                                |                                                                                                                                                                                                                                                                                                                                                                                                                                                                                                                                                                                                                                                                                                                            |
| Can you provide an estimate of the difference in patients achieving a threshold of function or improvement, and the associated number needed to treat                                                                                                          | <b>NA</b>                                                                                                                                                                                                                                                                                                                                                                                                                                                                                                                                                                                                                                                                                                                  |

|                                                                                         |                                                                                                                                                                                                                                                                                                                                                              |
|-----------------------------------------------------------------------------------------|--------------------------------------------------------------------------------------------------------------------------------------------------------------------------------------------------------------------------------------------------------------------------------------------------------------------------------------------------------------|
| <b>Article 15</b>                                                                       | <b>PACIFIC; Durvalumab after chemoradiotherapy; stage III, unresectable NSCLC</b>                                                                                                                                                                                                                                                                            |
| <b>First author &amp; year of publication</b>                                           | <b>Hui, 2019</b>                                                                                                                                                                                                                                                                                                                                             |
| <b>Stated purpose of article</b>                                                        | <i>Phase 3 PACIFIC trial, durvalumab improved the primary endpoints of progression-free survival and overall survival compared with that for placebo, with similar safety, in patients with unresectable, stage III non-small-cell lung cancer. In this analysis, we aimed to evaluate one of the secondary endpoints, patient-reported outcomes (PROs).</i> |
| <b>What were PROs measuring?</b>                                                        |                                                                                                                                                                                                                                                                                                                                                              |
| What concepts were the PROs used in the study measuring?                                | patients' symptoms, functioning, and global health status (ie, quality of life)                                                                                                                                                                                                                                                                              |
| What rationale (if any) for selection of concept or constructs did the authors provide? | <i>Patient-reported outcomes (PROs), which reflect patients' perspective of their symptoms, functioning, and health-related quality of life, can provide important complementary data to efficacy and safety endpoints.</i>                                                                                                                                  |
| Were patients involved in the selection of outcomes measured by the PROs?               | Not reported                                                                                                                                                                                                                                                                                                                                                 |
| <b>Omissions</b>                                                                        |                                                                                                                                                                                                                                                                                                                                                              |

Colomer-Lahiguera *et al. Journal of Patient-Reported Outcomes*

|                                                                                                                                                                                                                                                                |                                                                                                                                                                                                                                                                                                                                                                                                                                                                                                                                                                                                                                                                                                                                       |
|----------------------------------------------------------------------------------------------------------------------------------------------------------------------------------------------------------------------------------------------------------------|---------------------------------------------------------------------------------------------------------------------------------------------------------------------------------------------------------------------------------------------------------------------------------------------------------------------------------------------------------------------------------------------------------------------------------------------------------------------------------------------------------------------------------------------------------------------------------------------------------------------------------------------------------------------------------------------------------------------------------------|
| Were there any important aspects of health (e.g., symptoms, function, perceptions) or quality of life (e.g. overall evaluation, satisfaction with life) that were omitted in this study from the perspectives of the patient, clinician, significant others... | Treatment-related adverse events – any grade [13]                                                                                                                                                                                                                                                                                                                                                                                                                                                                                                                                                                                                                                                                                     |
| <b>If randomized trials and other studies measured PROs, what were the instruments' measurement strategies?</b>                                                                                                                                                |                                                                                                                                                                                                                                                                                                                                                                                                                                                                                                                                                                                                                                                                                                                                       |
| Did investigators use instruments that yield a single indicator or index number, a profile, or a battery or instruments?                                                                                                                                       | Battery: EORTC-QLQ-C30 and EORTC-LC13                                                                                                                                                                                                                                                                                                                                                                                                                                                                                                                                                                                                                                                                                                 |
| If investigators measure PROs, did they use specific or generic measures, or both?                                                                                                                                                                             | patient-reported symptoms, functioning, and global health status or quality of life                                                                                                                                                                                                                                                                                                                                                                                                                                                                                                                                                                                                                                                   |
| Who exactly completed the instruments?                                                                                                                                                                                                                         | All randomized patients                                                                                                                                                                                                                                                                                                                                                                                                                                                                                                                                                                                                                                                                                                               |
| <b>Did the instruments work in the way they were supposed to work - validity?</b>                                                                                                                                                                              |                                                                                                                                                                                                                                                                                                                                                                                                                                                                                                                                                                                                                                                                                                                                       |
| Had the instruments used been validated previously (provide reference)? Was evidence of prior validation for use in this population presented?                                                                                                                 | <i>QLQ-C30 was tested in interviews of patients with lung cancer during development of the disease-specific lung cancer module. Both QLQ-C30 and QLQ-LC13 are widely used in patients with advanced non-small-cell lung cancer, and they have been well validated in psychometric testing.</i><br>Aaronson NK, et al. The European Organization for Research and Treatment of Cancer QLQ-C30: a quality-of-life instrument for use in international clinical trials in oncology. J Natl Cancer Inst. 1993.<br>Bergman B, et al. The EORTC QLQ-LC13: a modular supplement to the EORTC Core Quality of Life Questionnaire (QLQ- C30) for use in lung cancer clinical trials. EORTC Study Group on Quality of Life. Eur J Cancer. 1994. |
| Were the instruments re-validated in this study?                                                                                                                                                                                                               | <b>No</b>                                                                                                                                                                                                                                                                                                                                                                                                                                                                                                                                                                                                                                                                                                                             |
| <b>Did the instruments work in the way they were supposed to work – ability to measure</b>                                                                                                                                                                     |                                                                                                                                                                                                                                                                                                                                                                                                                                                                                                                                                                                                                                                                                                                                       |
| Are the PROs able to detect change in patient status, even if those changes are small?                                                                                                                                                                         | <i>The between-group differences in changes from baseline to 12 months in cough (difference in adjusted mean changes 1.1, 95% CI –1.89 to 4.11), dyspnoea (1.6, –0.58 to 3.87), chest pain (0.4, –2.13 to 2.93), fatigue (2.2, –0.38 to 4.78), appetite loss (1.2, –1.27 to 3.67), physical functioning (–1.9, –3.91 to 0.15), or global health status or quality of life (0.8, –1.55 to 3.14) were not clinically relevant. Generally, there were no clinically important between group differences in time to deterioration of pre-specified key PRO endpoints.</i>                                                                                                                                                                 |
| <b>Can you make the magnitude of effect (if any) understandable to readers?</b>                                                                                                                                                                                |                                                                                                                                                                                                                                                                                                                                                                                                                                                                                                                                                                                                                                                                                                                                       |
| Can you provide an estimate of the difference in patients achieving a threshold of function or improvement, and the associated number needed to treat                                                                                                          | <b>NA</b>                                                                                                                                                                                                                                                                                                                                                                                                                                                                                                                                                                                                                                                                                                                             |

|                                                                                                                                                                                                                                                                |                                                                                                                                                                                                                         |
|----------------------------------------------------------------------------------------------------------------------------------------------------------------------------------------------------------------------------------------------------------------|-------------------------------------------------------------------------------------------------------------------------------------------------------------------------------------------------------------------------|
| <b>Article 16</b>                                                                                                                                                                                                                                              | <b>JAVELIN Merkel 200; avelumab; metastatic Merkel cell carcinoma</b>                                                                                                                                                   |
| <b>First author &amp; year of publication</b>                                                                                                                                                                                                                  | <b>Kaufman, 2018</b>                                                                                                                                                                                                    |
| <b>Stated purpose of article</b>                                                                                                                                                                                                                               | <i>To assess the association between tumor response and health-related quality of life (HRQoL) in patients with metastatic Merkel cell carcinoma treated with the anti-PD-L1 avelumab</i>                               |
| <b>What were PROs measuring?</b>                                                                                                                                                                                                                               |                                                                                                                                                                                                                         |
| What concepts were the PROs used in the study measuring?                                                                                                                                                                                                       | HRQoL                                                                                                                                                                                                                   |
| What rationale (if any) for selection of concept or constructs did the authors provide?                                                                                                                                                                        | To date, there is little knowledge about quality of life (QoL) and the impact of disease progression in patients with mMCC                                                                                              |
| Were patients involved in the selection of outcomes measured by the PROs?                                                                                                                                                                                      | Not reported                                                                                                                                                                                                            |
| <b>Omissions</b>                                                                                                                                                                                                                                               |                                                                                                                                                                                                                         |
| Were there any important aspects of health (e.g., symptoms, function, perceptions) or quality of life (e.g. overall evaluation, satisfaction with life) that were omitted in this study from the perspectives of the patient, clinician, significant others... | Treatment-related adverse events – any grade [14]<br><i>The majority of adverse events experienced under treatment with avelumab (including grade 3 or 4 adverse events) do not have a detrimental impact on HRQoL.</i> |
| <b>If randomized trials and other studies measured PROs, what were the instruments' measurement strategies?</b>                                                                                                                                                |                                                                                                                                                                                                                         |
| Did investigators use instruments that yield a single indicator or index number, a profile, or a battery or instruments?                                                                                                                                       | HRQoL was assessed with the melanoma-specific FACT-M questionnaire and the generic 5-level EQ-5D (EQ5D-5L) questionnaire                                                                                                |
| If investigators measure PROs, did they use specific or generic measures, or both?                                                                                                                                                                             | General health; Cancer-specific; disease specific                                                                                                                                                                       |
| Who exactly completed the instruments?                                                                                                                                                                                                                         |                                                                                                                                                                                                                         |



|                                                                                                                                                       |                                                                                                                                                                                                                                                                                                                                                                                                                                                                                                                                                                                                                                                                                                                                                                                                                                                                                                                                                                                                                                                                                                                               |
|-------------------------------------------------------------------------------------------------------------------------------------------------------|-------------------------------------------------------------------------------------------------------------------------------------------------------------------------------------------------------------------------------------------------------------------------------------------------------------------------------------------------------------------------------------------------------------------------------------------------------------------------------------------------------------------------------------------------------------------------------------------------------------------------------------------------------------------------------------------------------------------------------------------------------------------------------------------------------------------------------------------------------------------------------------------------------------------------------------------------------------------------------------------------------------------------------------------------------------------------------------------------------------------------------|
| <b>Did the instruments work in the way they were supposed to work - validity?</b>                                                                     |                                                                                                                                                                                                                                                                                                                                                                                                                                                                                                                                                                                                                                                                                                                                                                                                                                                                                                                                                                                                                                                                                                                               |
| Had the instruments used been validated previously (provide reference)? Was evidence of prior validation for use in this population presented?        | <i>Among generic instruments, the EuroQol – 5 Dimensions (EQ-5D) questionnaire has been widely used in oncology and has been shown to be reliable and responsive and to have content as well as construct validity.<br/>No disease-specific instruments exist to specifically capture health-related quality of life (HRQoL) in patients with MCC. However, the Functional Assessment of Cancer Therapy – Melanoma (FACT-M) has shown promising characteristics for patients with malignant melanomas</i><br>Schwenkglenks M, et al. Is the EQ-5D suitable for use in oncology? An overview of the literature and recent developments. Expert Rev. Pharmacoecon. Outcomes Res. (2016).<br>Cormier JN, Cromwell KD, Ross MI. Health-related quality of life in patients with melanoma: overview of instruments and outcomes. Dermatol. Clin. (2012).<br>EuroQol – a new facility for the measurement of health-related quality of life. Health Policy 16(3), 199–208 (1990).<br>Herdman M, Gudex C, Lloyd A et al. Development and preliminary testing of the new five-level version of EQ-5D (EQ-5D-5L). Qual. Life Res. 2011 |
| Were the instruments re-validated in this study?                                                                                                      | <b>Yes</b> , FACT-M for the MCC population<br><i>the content of the FACT-M seems appropriate to assess QoL in patients with MCC. This was further confirmed by a thorough psychometric validation of the FACT-M in the JAVELIN Merkel 200 trial population</i><br>Bharmal M, Fofana F, Dias Barbosa C, Mahnke L, Schlichting M. Psychometric validation of the FACT-M questionnaire in patients with Merkel cell carcinoma. Presented at: ISPOR 22nd Annual International Meeting. Abstract PCN189, MA, USA, 20–24 May 2017                                                                                                                                                                                                                                                                                                                                                                                                                                                                                                                                                                                                   |
| <b>Did the instruments work in the way they were supposed to work – ability to measure</b>                                                            |                                                                                                                                                                                                                                                                                                                                                                                                                                                                                                                                                                                                                                                                                                                                                                                                                                                                                                                                                                                                                                                                                                                               |
| Are the PROs able to detect change in patient status, even if those changes are small?                                                                | <i>Results show that reduction in tumor size correlates with improvements in patients' health status, as measured by both generic and skin cancer specific HRQoL instruments. Results also demonstrated significantly higher HRQoL and utility for patients with non-PD compared with PD, measured as per RECIST criteria. Clinically meaningful differences were observed for most FACT-M changes from baseline scores.</i>                                                                                                                                                                                                                                                                                                                                                                                                                                                                                                                                                                                                                                                                                                  |
| <b>Can you make the magnitude of effect (if any) understandable to readers?</b>                                                                       |                                                                                                                                                                                                                                                                                                                                                                                                                                                                                                                                                                                                                                                                                                                                                                                                                                                                                                                                                                                                                                                                                                                               |
| Can you provide an estimate of the difference in patients achieving a threshold of function or improvement, and the associated number needed to treat | <b>NA</b>                                                                                                                                                                                                                                                                                                                                                                                                                                                                                                                                                                                                                                                                                                                                                                                                                                                                                                                                                                                                                                                                                                                     |

|                                                                                                                                                                                                                                                                |                                                                                                                                                                                                                                                                                                                                                                                                                     |
|----------------------------------------------------------------------------------------------------------------------------------------------------------------------------------------------------------------------------------------------------------------|---------------------------------------------------------------------------------------------------------------------------------------------------------------------------------------------------------------------------------------------------------------------------------------------------------------------------------------------------------------------------------------------------------------------|
| <b>Article 17</b>                                                                                                                                                                                                                                              | <b>IMpower133; Atezolizumab, carboplatin, and etoposide; SCLC</b>                                                                                                                                                                                                                                                                                                                                                   |
| <b>First author &amp; year of publication</b>                                                                                                                                                                                                                  | <b>Mansfield, 2019</b>                                                                                                                                                                                                                                                                                                                                                                                              |
| <b>Stated purpose of article</b>                                                                                                                                                                                                                               | <i>We have evaluated adverse events (AEs) and patient-reported outcomes in IMpower133 to assess the benefit-risk profile of this regimen. Here we report the safety profile of atezolizumab combined with CP/ET in the induction and maintenance settings, and the impact of treatment on symptoms, functioning, and HRQoL from the patient's perspective, to inform overall treatment burden.</i>                  |
| <b>What were PROs measuring?</b>                                                                                                                                                                                                                               |                                                                                                                                                                                                                                                                                                                                                                                                                     |
| What concepts were the PROs used in the study measuring?                                                                                                                                                                                                       | symptoms, functioning, and HRQoL                                                                                                                                                                                                                                                                                                                                                                                    |
| What rationale (if any) for selection of concept or constructs did the authors provide?                                                                                                                                                                        | <i>In assessing the overall benefit-risk profile of a new treatment regimen, particularly in a non-curative setting, it is important to consider the impact of disease and/or treatment burden on patients' safety and health-related quality of life (HRQoL), to ensure that the benefits of enhanced tumor control and increased survival do not come at the expense of increased toxicity and reduced HRQoL.</i> |
| Were patients involved in the selection of outcomes measured by the PROs?                                                                                                                                                                                      | Not reported                                                                                                                                                                                                                                                                                                                                                                                                        |
| <b>Omissions</b>                                                                                                                                                                                                                                               |                                                                                                                                                                                                                                                                                                                                                                                                                     |
| Were there any important aspects of health (e.g., symptoms, function, perceptions) or quality of life (e.g. overall evaluation, satisfaction with life) that were omitted in this study from the perspectives of the patient, clinician, significant others... | Treatment-related adverse events – any grade [15]                                                                                                                                                                                                                                                                                                                                                                   |
| <b>If randomized trials and other studies measured PROs, what were the instruments' measurement strategies?</b>                                                                                                                                                |                                                                                                                                                                                                                                                                                                                                                                                                                     |
| Did investigators use instruments that yield a single indicator or index number, a profile, or a battery or instruments?                                                                                                                                       | Battery: EORTC QLQ-C30 and QLQ-LC13                                                                                                                                                                                                                                                                                                                                                                                 |
| If investigators measure PROs, did they use specific or generic measures, or both?                                                                                                                                                                             | Both: cancer-specific and disease specific                                                                                                                                                                                                                                                                                                                                                                          |
| Who exactly completed the instruments?                                                                                                                                                                                                                         | <b>Patients</b>                                                                                                                                                                                                                                                                                                                                                                                                     |
| <b>Did the instruments work in the way they were supposed to work - validity?</b>                                                                                                                                                                              |                                                                                                                                                                                                                                                                                                                                                                                                                     |

|                                                                                                                                                       |                                                                                                                                                                                                                                                                                                                                                                                                                                                                                                                                                                                 |
|-------------------------------------------------------------------------------------------------------------------------------------------------------|---------------------------------------------------------------------------------------------------------------------------------------------------------------------------------------------------------------------------------------------------------------------------------------------------------------------------------------------------------------------------------------------------------------------------------------------------------------------------------------------------------------------------------------------------------------------------------|
| Had the instruments used been validated previously (provide reference)? Was evidence of prior validation for use in this population presented?        | Aaronson NK, Ahmedzai S, Bergman B, et al. The European Organization for Research and Treatment of Cancer QLQ-C30: a quality of life instrument for use in international clinical trials in oncology. <i>J Natl Cancer Inst</i> 1993; 85:365-76<br>Bergman B, Aaronson NK, Ahmedzai S, Kaasa S, Sullivan M. The EORTC QLQ-LC13: a modular supplement to the EORTC core quality of life questionnaire (QLQ-C30) for use in lung cancer clinical trials. <i>EORTC Study Group on Quality of Life. Eur J Cancer</i> 1994; 30A:635-42                                               |
| Were the instruments re-validated in this study?                                                                                                      |                                                                                                                                                                                                                                                                                                                                                                                                                                                                                                                                                                                 |
| <b>Did the instruments work in the way they were supposed to work – ability to measure</b>                                                            |                                                                                                                                                                                                                                                                                                                                                                                                                                                                                                                                                                                 |
| Are the PROs able to detect change in patient status, even if those changes are small?                                                                | <i>Considering the broader impact of symptoms on patients' global health status, while HRQoL improved in both arms, clinically meaningful improvements persisted in the atezolizumab plus CP/ET arm through week 54, suggesting that the survival benefit achieved with the addition of atezolizumab to CP/ET was associated with minimal impact on treatment-related symptoms. Taken together, the notable HRQoL improvements reported by patients in the atezolizumab arm suggest that the addition of atezolizumab to CP/ET did not increase toxicity or symptom burden.</i> |
| <b>Can you make the magnitude of effect (if any) understandable to readers?</b>                                                                       |                                                                                                                                                                                                                                                                                                                                                                                                                                                                                                                                                                                 |
| Can you provide an estimate of the difference in patients achieving a threshold of function or improvement, and the associated number needed to treat | NA                                                                                                                                                                                                                                                                                                                                                                                                                                                                                                                                                                              |

|                                                                                                                                                                                                                                                                |                                                                                                                                                                                                                                                                                                                                                                                                                                                                                                                                                                                                                                                                                                                                       |
|----------------------------------------------------------------------------------------------------------------------------------------------------------------------------------------------------------------------------------------------------------------|---------------------------------------------------------------------------------------------------------------------------------------------------------------------------------------------------------------------------------------------------------------------------------------------------------------------------------------------------------------------------------------------------------------------------------------------------------------------------------------------------------------------------------------------------------------------------------------------------------------------------------------------------------------------------------------------------------------------------------------|
| <b>Article 18</b>                                                                                                                                                                                                                                              | <b>KEYNOTE-407; Carboplatin-Paclitaxel or nab-Paclitaxel with or without Pembrolizumab; Metastatic Squamous NSCLC</b>                                                                                                                                                                                                                                                                                                                                                                                                                                                                                                                                                                                                                 |
| <b>First author &amp; year of publication</b>                                                                                                                                                                                                                  | <b>Mazieres, 2019</b>                                                                                                                                                                                                                                                                                                                                                                                                                                                                                                                                                                                                                                                                                                                 |
| <b>Stated purpose of article</b>                                                                                                                                                                                                                               | <i>We report patient-reported outcomes (PROs) from KEYNOTE-407, which were evaluated as prespecified exploratory endpoints.</i>                                                                                                                                                                                                                                                                                                                                                                                                                                                                                                                                                                                                       |
| <b>What were PROs measuring?</b>                                                                                                                                                                                                                               |                                                                                                                                                                                                                                                                                                                                                                                                                                                                                                                                                                                                                                                                                                                                       |
| What concepts were the PROs used in the study measuring?                                                                                                                                                                                                       | GHS/QoL and time to deterioration in lung cancer symptoms                                                                                                                                                                                                                                                                                                                                                                                                                                                                                                                                                                                                                                                                             |
| What rationale (if any) for selection of concept or constructs did the authors provide?                                                                                                                                                                        | <i>Disease-related symptoms associated with advanced NSCLC are associated with poor health-related quality of life (HRQoL)</i>                                                                                                                                                                                                                                                                                                                                                                                                                                                                                                                                                                                                        |
| Were patients involved in the selection of outcomes measured by the PROs?                                                                                                                                                                                      | Not reported                                                                                                                                                                                                                                                                                                                                                                                                                                                                                                                                                                                                                                                                                                                          |
| <b>Omissions</b>                                                                                                                                                                                                                                               |                                                                                                                                                                                                                                                                                                                                                                                                                                                                                                                                                                                                                                                                                                                                       |
| Were there any important aspects of health (e.g., symptoms, function, perceptions) or quality of life (e.g. overall evaluation, satisfaction with life) that were omitted in this study from the perspectives of the patient, clinician, significant others... | Treatment-related adverse events – any grade [16]                                                                                                                                                                                                                                                                                                                                                                                                                                                                                                                                                                                                                                                                                     |
| <b>If randomized trials and other studies measured PROs, what were the instruments' measurement strategies?</b>                                                                                                                                                |                                                                                                                                                                                                                                                                                                                                                                                                                                                                                                                                                                                                                                                                                                                                       |
| Did investigators use instruments that yield a single indicator or index number, a profile, or a battery or instruments?                                                                                                                                       | Battery: EQ-5D-3L, EORTC QLQ-C30, and EORTC QLQ-LC13                                                                                                                                                                                                                                                                                                                                                                                                                                                                                                                                                                                                                                                                                  |
| If investigators measure PROs, did they use specific or generic measures, or both?                                                                                                                                                                             | General health status, cancer-specific, disease-specific                                                                                                                                                                                                                                                                                                                                                                                                                                                                                                                                                                                                                                                                              |
| Who exactly completed the instruments?                                                                                                                                                                                                                         | <b>patients</b>                                                                                                                                                                                                                                                                                                                                                                                                                                                                                                                                                                                                                                                                                                                       |
| <b>Did the instruments work in the way they were supposed to work - validity?</b>                                                                                                                                                                              |                                                                                                                                                                                                                                                                                                                                                                                                                                                                                                                                                                                                                                                                                                                                       |
| Had the instruments used been validated previously (provide reference)? Was evidence of prior validation for use in this population presented?                                                                                                                 | Aaronson NK, Ahmedzai S, Bergman B, et al. The European Organization for Research and Treatment of Cancer QLQ-C30: a quality of life instrument for use in international clinical trials in oncology. <i>J Natl Cancer Inst</i> 1993; 85:365-76<br>Bergman B, Aaronson NK, Ahmedzai S, Kaasa S, Sullivan M. The EORTC QLQ-LC13: a modular supplement to the EORTC core quality of life questionnaire (QLQ-C30) for use in lung cancer clinical trials. <i>EORTC Study Group on Quality of Life. Eur J Cancer</i> 1994; 30A:635-42                                                                                                                                                                                                     |
| Were the instruments re-validated in this study?                                                                                                                                                                                                               | No                                                                                                                                                                                                                                                                                                                                                                                                                                                                                                                                                                                                                                                                                                                                    |
| <b>Did the instruments work in the way they were supposed to work – ability to measure</b>                                                                                                                                                                     |                                                                                                                                                                                                                                                                                                                                                                                                                                                                                                                                                                                                                                                                                                                                       |
| Are the PROs able to detect change in patient status, even if those changes are small?                                                                                                                                                                         | <i>HRQoL results favoring the pembrolizumab-combination group at week 18 were supported by trends in the EORTC functional scales, which favored the pembrolizumab combination group across all scales at weeks 9 and 18. The largest differences occurred in physical functioning (abilities essential for maintaining independence) and role functioning (abilities for work/leisure). Improvements in physical and role functioning are relevant, given the anticipated continued increase in cancer survivorship; treatment regimens may differentially affect patient functioning, and physical and role functional status is likely to affect HRQoL. The symptom scale results include trends favoring each treatment group.</i> |
| <b>Can you make the magnitude of effect (if any) understandable to readers?</b>                                                                                                                                                                                |                                                                                                                                                                                                                                                                                                                                                                                                                                                                                                                                                                                                                                                                                                                                       |

|                                                                                                                                                       |    |
|-------------------------------------------------------------------------------------------------------------------------------------------------------|----|
| Can you provide an estimate of the difference in patients achieving a threshold of function or improvement, and the associated number needed to treat | NA |
|-------------------------------------------------------------------------------------------------------------------------------------------------------|----|

| Article 19                                                                                                                                                                                                                                                     | CheckMate 358; Nivolumab; Recurrent or Metastatic Cervical, Vaginal, or Vulvar Carcinoma                                                                                                                                                                                                                                                                                                                                                                                                                                                                                                                                                                                                                                                                                               |
|----------------------------------------------------------------------------------------------------------------------------------------------------------------------------------------------------------------------------------------------------------------|----------------------------------------------------------------------------------------------------------------------------------------------------------------------------------------------------------------------------------------------------------------------------------------------------------------------------------------------------------------------------------------------------------------------------------------------------------------------------------------------------------------------------------------------------------------------------------------------------------------------------------------------------------------------------------------------------------------------------------------------------------------------------------------|
| First author & year of publication                                                                                                                                                                                                                             | Naumann, 2019<br><i>*The article presents the results of a phase I/II study including PROs as an exploratory outcome.</i>                                                                                                                                                                                                                                                                                                                                                                                                                                                                                                                                                                                                                                                              |
| Stated purpose of article                                                                                                                                                                                                                                      | <i>Nivolumab was assessed in patients with virus-associated tumors in the phase I/II CheckMate 358 trial. We report on patients with recurrent/metastatic cervical, vaginal, or vulvar cancers. Exploratory end points included safety and patient-reported outcomes (PROs)</i>                                                                                                                                                                                                                                                                                                                                                                                                                                                                                                        |
| <b>What were PROs measuring?</b>                                                                                                                                                                                                                               |                                                                                                                                                                                                                                                                                                                                                                                                                                                                                                                                                                                                                                                                                                                                                                                        |
| What concepts were the PROs used in the study measuring?                                                                                                                                                                                                       | cancer-specific health-related quality of life and overall health status                                                                                                                                                                                                                                                                                                                                                                                                                                                                                                                                                                                                                                                                                                               |
| What rationale (if any) for selection of concept or constructs did the authors provide?                                                                                                                                                                        | Not Reported                                                                                                                                                                                                                                                                                                                                                                                                                                                                                                                                                                                                                                                                                                                                                                           |
| Were patients involved in the selection of outcomes measured by the PROs?                                                                                                                                                                                      | Not reported                                                                                                                                                                                                                                                                                                                                                                                                                                                                                                                                                                                                                                                                                                                                                                           |
| <b>Omissions</b>                                                                                                                                                                                                                                               |                                                                                                                                                                                                                                                                                                                                                                                                                                                                                                                                                                                                                                                                                                                                                                                        |
| Were there any important aspects of health (e.g., symptoms, function, perceptions) or quality of life (e.g. overall evaluation, satisfaction with life) that were omitted in this study from the perspectives of the patient, clinician, significant others... | Treatment-related adverse events – any grade [17]                                                                                                                                                                                                                                                                                                                                                                                                                                                                                                                                                                                                                                                                                                                                      |
| <b>If randomized trials and other studies measured PROs, what were the instruments' measurement strategies?</b>                                                                                                                                                |                                                                                                                                                                                                                                                                                                                                                                                                                                                                                                                                                                                                                                                                                                                                                                                        |
| Did investigators use instruments that yield a single indicator or index number, a profile, or a battery of instruments?                                                                                                                                       | Battery: EQ-5D and EORTC QLQ-C30                                                                                                                                                                                                                                                                                                                                                                                                                                                                                                                                                                                                                                                                                                                                                       |
| If investigators measure PROs, did they use specific or generic measures, or both?                                                                                                                                                                             | Cancer-specific and general health status                                                                                                                                                                                                                                                                                                                                                                                                                                                                                                                                                                                                                                                                                                                                              |
| Who exactly completed the instruments?                                                                                                                                                                                                                         | Patients undergoing treatment                                                                                                                                                                                                                                                                                                                                                                                                                                                                                                                                                                                                                                                                                                                                                          |
| <b>Did the instruments work in the way they were supposed to work - validity?</b>                                                                                                                                                                              |                                                                                                                                                                                                                                                                                                                                                                                                                                                                                                                                                                                                                                                                                                                                                                                        |
| Had the instruments used been validated previously (provide reference)? Was evidence of prior validation for use in this population presented?                                                                                                                 | Not Reported                                                                                                                                                                                                                                                                                                                                                                                                                                                                                                                                                                                                                                                                                                                                                                           |
| Were the instruments re-validated in this study?                                                                                                                                                                                                               | No                                                                                                                                                                                                                                                                                                                                                                                                                                                                                                                                                                                                                                                                                                                                                                                     |
| <b>Did the instruments work in the way they were supposed to work – ability to measure</b>                                                                                                                                                                     |                                                                                                                                                                                                                                                                                                                                                                                                                                                                                                                                                                                                                                                                                                                                                                                        |
| Are the PROs able to detect change in patient status, even if those changes are small?                                                                                                                                                                         | <i>Patients were stable at week 9 compared with baseline on the basis of EQ-5D utility scores and EQ-5D visual analog scale scores. PRO data were not reported for the vaginal/vulvar cohort owing to small patient numbers<br/>On the basis of EORTC QLQ-C30 scores, global health status was stable at week 9 compared with baseline, as were physical functioning, emotional functioning, and social functioning; however, clinically meaningful deterioration was noted in role functioning and cognitive functioning. Patients reported clinically meaningful improvement in pain and constipation, clinically meaningful deterioration in fatigue, and stability with regard to nausea and vomiting, dyspnea, insomnia, appetite loss, diarrhea, and financial difficulties.</i> |
| <b>Can you make the magnitude of effect (if any) understandable to readers?</b>                                                                                                                                                                                |                                                                                                                                                                                                                                                                                                                                                                                                                                                                                                                                                                                                                                                                                                                                                                                        |
| Can you provide an estimate of the difference in patients achieving a threshold of function or improvement, and the associated number needed to treat                                                                                                          | NA                                                                                                                                                                                                                                                                                                                                                                                                                                                                                                                                                                                                                                                                                                                                                                                     |

| Article 20                         | Study 1108; Durvalumab; Advanced/Metastatic Urothelial Carcinoma                                                                                                 |
|------------------------------------|------------------------------------------------------------------------------------------------------------------------------------------------------------------|
| First author & year of publication | O'Donnell, 2019<br><i>*The article presents the results of PRO and biomarkers in a phase I/II study</i>                                                          |
| Stated purpose of article          | Here, in a post hoc analysis of Study 1108, we report the impact of durvalumab on PROs, and we assess the relationship between inflammatory biomarkers and PROs. |

|                                                                                                                                                                                                                                                                |                                                                                                                                                                                                                                                                                                                                                                                                                                                                                            |
|----------------------------------------------------------------------------------------------------------------------------------------------------------------------------------------------------------------------------------------------------------------|--------------------------------------------------------------------------------------------------------------------------------------------------------------------------------------------------------------------------------------------------------------------------------------------------------------------------------------------------------------------------------------------------------------------------------------------------------------------------------------------|
| <b>What were PROs measuring?</b>                                                                                                                                                                                                                               |                                                                                                                                                                                                                                                                                                                                                                                                                                                                                            |
| What concepts were the PROs used in the study measuring?                                                                                                                                                                                                       | Disease-related symptoms, functioning, and HRQOL                                                                                                                                                                                                                                                                                                                                                                                                                                           |
| What rationale (if any) for selection of concept or constructs did the authors provide?                                                                                                                                                                        | As novel treatments for mUC emerge, it is equally important to evaluate changes in disease-related symptoms, functioning, and HRQOL with patient-reported outcome (PRO) measures along- side efficacy and safety data.                                                                                                                                                                                                                                                                     |
| Were patients involved in the selection of outcomes measured by the PROs?                                                                                                                                                                                      | No                                                                                                                                                                                                                                                                                                                                                                                                                                                                                         |
| <b>Omissions</b>                                                                                                                                                                                                                                               |                                                                                                                                                                                                                                                                                                                                                                                                                                                                                            |
| Were there any important aspects of health (e.g., symptoms, function, perceptions) or quality of life (e.g. overall evaluation, satisfaction with life) that were omitted in this study from the perspectives of the patient, clinician, significant others... | Treatment-related adverse events – any grade [18]                                                                                                                                                                                                                                                                                                                                                                                                                                          |
| <b>If randomized trials and other studies measured PROs, what were the instruments' measurement strategies?</b>                                                                                                                                                |                                                                                                                                                                                                                                                                                                                                                                                                                                                                                            |
| Did investigators use instruments that yield a single indicator or index number, a profile, or a battery or instruments?                                                                                                                                       | Battery: Functional Assessment of Cancer Therapy–Bladder (FACT-BI), EORTC QLQ-C30, and a single-item pain questionnaire                                                                                                                                                                                                                                                                                                                                                                    |
| If investigators measure PROs, did they use specific or generic measures, or both?                                                                                                                                                                             | Cancer-specific, disease-specific, symptom-specific (single item)                                                                                                                                                                                                                                                                                                                                                                                                                          |
| Who exactly completed the instruments?                                                                                                                                                                                                                         | patients                                                                                                                                                                                                                                                                                                                                                                                                                                                                                   |
| <b>Did the instruments work in the way they were supposed to work - validity?</b>                                                                                                                                                                              |                                                                                                                                                                                                                                                                                                                                                                                                                                                                                            |
| Had the instruments used been validated previously (provide reference)? Was evidence of prior validation for use in this population presented?                                                                                                                 | Supporting information file:<br>Cella D. FACIT Manual: Manual of the Functional Assessment of Chronic Illness Therapy (FACIT) Scales. 4th ed. Evanston, Illinois: Evanston Northwestern Healthcare and Northwestern University; 1997.<br>Aaronson NK, Ahmedzai S, Bergman B, et al. The European Organization for Research and Treatment of Cancer QLQ-C30: a quality-of-life instrument for use in international clinical trials in oncology. <i>J Natl Cancer Inst.</i> 1993;85:365-376. |
| Were the instruments re-validated in this study?                                                                                                                                                                                                               | No                                                                                                                                                                                                                                                                                                                                                                                                                                                                                         |
| <b>Did the instruments work in the way they were supposed to work – ability to measure</b>                                                                                                                                                                     |                                                                                                                                                                                                                                                                                                                                                                                                                                                                                            |
| Are the PROs able to detect change in patient status, even if those changes are small?                                                                                                                                                                         | <i>Improvements in scores over time were seen with FACT-BI total scores, FACT-BI BLCS, and FACT-BI TOI together with improvements in the EORTC QLQ-C30 functional domains, Global Health Status score, and symptom scores (Pain and Fatigue). HRQOL improvements in patients with stable disease do not represent a response, but they do signify a potential clinical benefit.</i>                                                                                                        |
| <b>Can you make the magnitude of effect (if any) understandable to readers?</b>                                                                                                                                                                                |                                                                                                                                                                                                                                                                                                                                                                                                                                                                                            |
| Can you provide an estimate of the difference in patients achieving a threshold of function or improvement, and the associated number needed to treat                                                                                                          | NA                                                                                                                                                                                                                                                                                                                                                                                                                                                                                         |

|                                                                                                                                 |                                                                                                                                                                                                                                                                                                                                                                    |
|---------------------------------------------------------------------------------------------------------------------------------|--------------------------------------------------------------------------------------------------------------------------------------------------------------------------------------------------------------------------------------------------------------------------------------------------------------------------------------------------------------------|
| <b>Article 21</b>                                                                                                               | <b>CheckMate 017; Nivolumab versus Docetaxel ; Advanced Squamous NSCLC</b>                                                                                                                                                                                                                                                                                         |
| <b>First author &amp; year of publication</b>                                                                                   | <b>Reck, 2017</b>                                                                                                                                                                                                                                                                                                                                                  |
| <b>Stated purpose of article</b>                                                                                                | <i>In the phase III CheckMate 017 study, nivolumab prolonged overall survival versus docetaxel in previously treated patients with advanced squamous NSCLC. Study objectives included health-related quality of life (HRQoL) and symptom assessments.</i>                                                                                                          |
| <b>What were PROs measuring?</b>                                                                                                |                                                                                                                                                                                                                                                                                                                                                                    |
| What concepts were the PROs used in the study measuring?                                                                        | Health-Related Quality of Life and Symptoms                                                                                                                                                                                                                                                                                                                        |
| What rationale (if any) for selection of concept or constructs did the authors provide?                                         | <i>Assessment of patient-reported outcomes (PROs) in cancer trials is valuable for understanding in- dividual symptom benefits, impact on HRQoL, and the balance of potential risks with treatment.<br/>Few studies have reported on HRQoL in the second-line NSCLC setting, and none has evaluated pa- tients with the squamous histologic type specifically.</i> |
| Were patients involved in the selection of outcomes measured by the PROs?                                                       | Not Reported                                                                                                                                                                                                                                                                                                                                                       |
| <b>Omissions</b>                                                                                                                |                                                                                                                                                                                                                                                                                                                                                                    |
| Were there any important aspects of health (e.g., symptoms, function, perceptions) or quality of life (e.g. overall evaluation, | Treatment-related adverse events – any grade [19]                                                                                                                                                                                                                                                                                                                  |

Colomer-Lahiguera *et al. Journal of Patient-Reported Outcomes*

|                                                                                                                                                       |                                                                                                                                                                                                                                                                                                                                                                                                                                                                                                                                                                                                                                                                                                                                                                                                                                                                                                                                                                                                                                                  |
|-------------------------------------------------------------------------------------------------------------------------------------------------------|--------------------------------------------------------------------------------------------------------------------------------------------------------------------------------------------------------------------------------------------------------------------------------------------------------------------------------------------------------------------------------------------------------------------------------------------------------------------------------------------------------------------------------------------------------------------------------------------------------------------------------------------------------------------------------------------------------------------------------------------------------------------------------------------------------------------------------------------------------------------------------------------------------------------------------------------------------------------------------------------------------------------------------------------------|
| satisfaction with life) that were omitted in this study from the perspectives of the patient, clinician, significant others...                        |                                                                                                                                                                                                                                                                                                                                                                                                                                                                                                                                                                                                                                                                                                                                                                                                                                                                                                                                                                                                                                                  |
| <b>If randomized trials and other studies measured PROs, what were the instruments' measurement strategies?</b>                                       |                                                                                                                                                                                                                                                                                                                                                                                                                                                                                                                                                                                                                                                                                                                                                                                                                                                                                                                                                                                                                                                  |
| Did investigators use instruments that yield a single indicator or index number, a profile, or a battery or instruments?                              | Battery: LCSS, EQ-SD utility index; EQ-5D VAS                                                                                                                                                                                                                                                                                                                                                                                                                                                                                                                                                                                                                                                                                                                                                                                                                                                                                                                                                                                                    |
| If investigators measure PROs, did they use specific or generic measures, or both?                                                                    | General health status and disease-specific                                                                                                                                                                                                                                                                                                                                                                                                                                                                                                                                                                                                                                                                                                                                                                                                                                                                                                                                                                                                       |
| Who exactly completed the instruments?                                                                                                                | Patients                                                                                                                                                                                                                                                                                                                                                                                                                                                                                                                                                                                                                                                                                                                                                                                                                                                                                                                                                                                                                                         |
| <b>Did the instruments work in the way they were supposed to work - validity?</b>                                                                     |                                                                                                                                                                                                                                                                                                                                                                                                                                                                                                                                                                                                                                                                                                                                                                                                                                                                                                                                                                                                                                                  |
| Had the instruments used been validated previously (provide reference)? Was evidence of prior validation for use in this population presented?        | HRQoL was analyzed by using the validated, patient-reported Lung Cancer Symptom Scale (LCSS) and the European Quality of Life Five Dimensions (EQ-5D) questionnaires.<br>Hollen PJ, Gralla RJ, Kris MG, Potanovich LM. Quality of life assessment in individuals with lung cancer: testing the Lung Cancer Symptom Scale (LCSS). <i>Eur J Cancer</i> . 1993<br>Hollen PJ, et al. Measurement of quality of life in patients with lung cancer in multicenter trials of new therapies. Psychometric assessment of the Lung Cancer Symptom Scale. <i>Cancer</i> . 1994<br>Hollen PJ, Gralla RJ, Kris MG, Cox C. Quality of life during clinical trials: conceptual model for the Lung Cancer Symptom Scale (LCSS). <i>Support Care Cancer</i> . 1994<br>Pickard AS, Neary MP, Cella D. Estimation of minimally important differences in EQ-5D utility and VAS scores in cancer. <i>Health Qual Life Outcomes</i> . 2007<br>EuroQol Group. EuroQol—a new facility for the measurement of health-related quality of life. <i>Health Policy</i> . 1990 |
| Were the instruments re-validated in this study?                                                                                                      | No                                                                                                                                                                                                                                                                                                                                                                                                                                                                                                                                                                                                                                                                                                                                                                                                                                                                                                                                                                                                                                               |
| <b>Did the instruments work in the way they were supposed to work – ability to measure</b>                                                            |                                                                                                                                                                                                                                                                                                                                                                                                                                                                                                                                                                                                                                                                                                                                                                                                                                                                                                                                                                                                                                                  |
| Are the PROs able to detect change in patient status, even if those changes are small?                                                                | <i>Although disease-related symptom improvement was similar with nivolumab and docetaxel at the prespecified 12-week analysis, clear improvements with nivolumab were evident at later time points, which may be related to its distinct mechanism of action. These conclusions are supported by data from two PRO instruments and a multistep analytical plan evaluating data descriptively, cross-sectionally, and longitudinally.</i>                                                                                                                                                                                                                                                                                                                                                                                                                                                                                                                                                                                                         |
| <b>Can you make the magnitude of effect (if any) understandable to readers?</b>                                                                       |                                                                                                                                                                                                                                                                                                                                                                                                                                                                                                                                                                                                                                                                                                                                                                                                                                                                                                                                                                                                                                                  |
| Can you provide an estimate of the difference in patients achieving a threshold of function or improvement, and the associated number needed to treat | NA                                                                                                                                                                                                                                                                                                                                                                                                                                                                                                                                                                                                                                                                                                                                                                                                                                                                                                                                                                                                                                               |

|                                                                                                                                                                                                                                                                |                                                                                      |
|----------------------------------------------------------------------------------------------------------------------------------------------------------------------------------------------------------------------------------------------------------------|--------------------------------------------------------------------------------------|
| <b>Article 22</b>                                                                                                                                                                                                                                              | <b>CheckMate 227; Nivolumab plus ipilimumab versus chemotherapy ; advanced NSCLC</b> |
| <b>First author &amp; year of publication</b>                                                                                                                                                                                                                  | <b>Reck, 2019</b>                                                                    |
| <b>Stated purpose of article</b>                                                                                                                                                                                                                               | <i>To evaluate patient-reported outcomes (PROs) in this population.</i>              |
| <b>What were PROs measuring?</b>                                                                                                                                                                                                                               |                                                                                      |
| What concepts were the PROs used in the study measuring?                                                                                                                                                                                                       | Disease-related symptoms and general health status                                   |
| What rationale (if any) for selection of concept or constructs did the authors provide?                                                                                                                                                                        | High symptom burden of patients with non-NSCLC                                       |
| Were patients involved in the selection of outcomes measured by the PROs?                                                                                                                                                                                      | Not Reported                                                                         |
| <b>Omissions</b>                                                                                                                                                                                                                                               |                                                                                      |
| Were there any important aspects of health (e.g., symptoms, function, perceptions) or quality of life (e.g. overall evaluation, satisfaction with life) that were omitted in this study from the perspectives of the patient, clinician, significant others... | Treatment-related adverse events – any grade [20]                                    |
| <b>If randomized trials and other studies measured PROs, what were the instruments' measurement strategies?</b>                                                                                                                                                |                                                                                      |
| Did investigators use instruments that yield a single indicator or index number, a profile, or a battery or instruments?                                                                                                                                       | Battery: Lung Cancer Symptom Scale(LCSS), EQ-5D                                      |
| If investigators measure PROs, did they use specific or generic measures, or both?                                                                                                                                                                             | General health status and disease-specific                                           |

Colomer-Lahiguera *et al. Journal of Patient-Reported Outcomes*

|                                                                                                                                                       |                                                                                                                                                                                                                                                                                                                                                                                                                                                                                                                                                                                                                                                                                                                                                                                                                                                                                                                                                         |
|-------------------------------------------------------------------------------------------------------------------------------------------------------|---------------------------------------------------------------------------------------------------------------------------------------------------------------------------------------------------------------------------------------------------------------------------------------------------------------------------------------------------------------------------------------------------------------------------------------------------------------------------------------------------------------------------------------------------------------------------------------------------------------------------------------------------------------------------------------------------------------------------------------------------------------------------------------------------------------------------------------------------------------------------------------------------------------------------------------------------------|
| Who exactly completed the instruments?                                                                                                                | Patients                                                                                                                                                                                                                                                                                                                                                                                                                                                                                                                                                                                                                                                                                                                                                                                                                                                                                                                                                |
| <b>Did the instruments work in the way they were supposed to work - validity?</b>                                                                     |                                                                                                                                                                                                                                                                                                                                                                                                                                                                                                                                                                                                                                                                                                                                                                                                                                                                                                                                                         |
| Had the instruments used been validated previously (provide reference)? Was evidence of prior validation for use in this population presented?        | PROs were assessed using two validated measures, the Lung Cancer Symptom Scale (LCSS) to examine the impact of treatment on lung cancer-specific symptoms and the EQ-5D to examine the impact of treatment on general health status.<br>Hollen, PJ, Gralla RJ, Kris MG, Cox C. Quality of life during clinical trials: conceptual model for the Lung Cancer Symptom Scale (LCSS). Support Care Canc 1994; 2(4): 213-22<br>Hollen, PJ, et al. Measurement of quality of life in patients with lung cancer in multicentre trails of new therapies. Psychometric assessment of the Lung Cancer Symptom Scale. Cancer 1994; 73(8):2087-98.<br>Hollen, PJ, Gralla RJ, Kris MG, Potanovich LM. Quality of life assessment in individuals with lung cancer: testing the Lung Cancer Symptoms Scale (LCSS). Eur J Cancer 1993;29A(Suppl 1):S51-8.<br>Rabin R, de Charro F. EQ-5D: a measure of health status from the EuroQoL Group. Ann Med 2001;33(5):337-43. |
| Were the instruments re-validated in this study?                                                                                                      | No                                                                                                                                                                                                                                                                                                                                                                                                                                                                                                                                                                                                                                                                                                                                                                                                                                                                                                                                                      |
| <b>Did the instruments work in the way they were supposed to work – ability to measure</b>                                                            |                                                                                                                                                                                                                                                                                                                                                                                                                                                                                                                                                                                                                                                                                                                                                                                                                                                                                                                                                         |
| Are the PROs able to detect change in patient status, even if those changes are small?                                                                | patients treated with nivolumab plus ipilimumab experienced more rapid, durable and clinically meaningful improvements in PROs than those treated with chemotherapy.                                                                                                                                                                                                                                                                                                                                                                                                                                                                                                                                                                                                                                                                                                                                                                                    |
| <b>Can you make the magnitude of effect (if any) understandable to readers?</b>                                                                       |                                                                                                                                                                                                                                                                                                                                                                                                                                                                                                                                                                                                                                                                                                                                                                                                                                                                                                                                                         |
| Can you provide an estimate of the difference in patients achieving a threshold of function or improvement, and the associated number needed to treat | NA                                                                                                                                                                                                                                                                                                                                                                                                                                                                                                                                                                                                                                                                                                                                                                                                                                                                                                                                                      |

|                                                                                                                                                                                                                                                                |                                                                                                                                                                                                                                                                                                                                                                                                                                                                                                                                                                            |
|----------------------------------------------------------------------------------------------------------------------------------------------------------------------------------------------------------------------------------------------------------------|----------------------------------------------------------------------------------------------------------------------------------------------------------------------------------------------------------------------------------------------------------------------------------------------------------------------------------------------------------------------------------------------------------------------------------------------------------------------------------------------------------------------------------------------------------------------------|
| <b>Article 23</b>                                                                                                                                                                                                                                              | <b>CheckMate 153; Nivolumab; Advanced Non–Small Cell Lung Cancer</b>                                                                                                                                                                                                                                                                                                                                                                                                                                                                                                       |
| <b>First author &amp; year of publication</b>                                                                                                                                                                                                                  | Spigel, 2019<br><i>*The article presents the results of a phase IIIB/IV study including PROs as an exploratory outcome.</i>                                                                                                                                                                                                                                                                                                                                                                                                                                                |
| <b>Stated purpose of article</b>                                                                                                                                                                                                                               | <i>we report safety, efficacy, and patient-reported outcome (PRO) results from CheckMate 153 for the entire patient population, patients aged 70 years or older, and those with an Eastern Cooperative Oncology Group performance status (ECOG PS) of 2.</i>                                                                                                                                                                                                                                                                                                               |
| <b>What were PROs measuring?</b>                                                                                                                                                                                                                               |                                                                                                                                                                                                                                                                                                                                                                                                                                                                                                                                                                            |
| What concepts were the PROs used in the study measuring?                                                                                                                                                                                                       | General QoL, symptom burden                                                                                                                                                                                                                                                                                                                                                                                                                                                                                                                                                |
| What rationale (if any) for selection of concept or constructs did the authors provide?                                                                                                                                                                        | Not Reported                                                                                                                                                                                                                                                                                                                                                                                                                                                                                                                                                               |
| Were patients involved in the selection of outcomes measured by the PROs?                                                                                                                                                                                      | Not Reported                                                                                                                                                                                                                                                                                                                                                                                                                                                                                                                                                               |
| <b>Omissions</b>                                                                                                                                                                                                                                               |                                                                                                                                                                                                                                                                                                                                                                                                                                                                                                                                                                            |
| Were there any important aspects of health (e.g., symptoms, function, perceptions) or quality of life (e.g. overall evaluation, satisfaction with life) that were omitted in this study from the perspectives of the patient, clinician, significant others... | Treatment-related adverse events – any grade [21]                                                                                                                                                                                                                                                                                                                                                                                                                                                                                                                          |
| <b>If randomized trials and other studies measured PROs, what were the instruments' measurement strategies?</b>                                                                                                                                                |                                                                                                                                                                                                                                                                                                                                                                                                                                                                                                                                                                            |
| Did investigators use instruments that yield a single indicator or index number, a profile, or a battery or instruments?                                                                                                                                       | Battery: EQ-5D and LCSS                                                                                                                                                                                                                                                                                                                                                                                                                                                                                                                                                    |
| If investigators measure PROs, did they use specific or generic measures, or both?                                                                                                                                                                             | Generic health status; disease-specific                                                                                                                                                                                                                                                                                                                                                                                                                                                                                                                                    |
| Who exactly completed the instruments?                                                                                                                                                                                                                         | patients                                                                                                                                                                                                                                                                                                                                                                                                                                                                                                                                                                   |
| <b>Did the instruments work in the way they were supposed to work - validity?</b>                                                                                                                                                                              |                                                                                                                                                                                                                                                                                                                                                                                                                                                                                                                                                                            |
| Had the instruments used been validated previously (provide reference)? Was evidence of prior validation for use in this population presented?                                                                                                                 | EuroQoL Research Foundation. EQ-5D-3L user guide. Version 5.1. April 2015. <a href="https://euroqol.org/wpcontent/uploads/2016/09/EQ-5D-3L_UserGuide_2015.pdf">https://euroqol.org/wpcontent/uploads/2016/09/EQ-5D-3L_UserGuide_2015.pdf</a><br>Bharmal M, Thomas J 3rd. Comparing the EQ-5D and the SF-6D descriptive systems to assess their ceiling effects in the US general population. Value Health. 2006<br>Pickard AS, Neary MP, Cella D. Estimation of minimally important differences in EQ-5D utility and VAS scores in cancer. Health Qual Life Outcomes. 2007 |

|                                                                                                                                                       |                                                                                                                                                                                                                                                                                                                                                                                                                                                                                                                                                                                                                                                                                                                                                                   |
|-------------------------------------------------------------------------------------------------------------------------------------------------------|-------------------------------------------------------------------------------------------------------------------------------------------------------------------------------------------------------------------------------------------------------------------------------------------------------------------------------------------------------------------------------------------------------------------------------------------------------------------------------------------------------------------------------------------------------------------------------------------------------------------------------------------------------------------------------------------------------------------------------------------------------------------|
|                                                                                                                                                       | Hollen PJ, Gralla RJ, Kris MG, et al. Measurement of quality of life in patients with lung cancer in multicenter trials of new therapies. Psychometric assessment of the Lung Cancer Symptom Scale. Cancer. 1994                                                                                                                                                                                                                                                                                                                                                                                                                                                                                                                                                  |
| Were the instruments re-validated in this study?                                                                                                      |                                                                                                                                                                                                                                                                                                                                                                                                                                                                                                                                                                                                                                                                                                                                                                   |
| <b>Did the instruments work in the way they were supposed to work – ability to measure</b>                                                            |                                                                                                                                                                                                                                                                                                                                                                                                                                                                                                                                                                                                                                                                                                                                                                   |
| Are the PROs able to detect change in patient status, even if those changes are small?                                                                | <i>Patients' symptom burden (as measured by the LCSS average symptom burden index) decreased with length of time receiving treatment; the mean change from baseline in symptoms decreased continually for patients still receiving treatment and approached the clinically meaningful threshold of a mean change from baseline of more than 10 points. Very similar patterns of improved quality of life and decreased symptom burden were also observed in patients aged 70 years or older. Patients with an ECOG PS of 2 had a lower quality of life and greater symptom burden at baseline than did the overall population; however, these patients also demonstrated improvements in quality of life and decreases in symptoms while undergoing treatment</i> |
| <b>Can you make the magnitude of effect (if any) understandable to readers?</b>                                                                       |                                                                                                                                                                                                                                                                                                                                                                                                                                                                                                                                                                                                                                                                                                                                                                   |
| Can you provide an estimate of the difference in patients achieving a threshold of function or improvement, and the associated number needed to treat | NA                                                                                                                                                                                                                                                                                                                                                                                                                                                                                                                                                                                                                                                                                                                                                                |

|                                                                                                                                                                                                                                                                |                                                                                                                                                                                                                                                                                                                                                                                                                                                                                              |
|----------------------------------------------------------------------------------------------------------------------------------------------------------------------------------------------------------------------------------------------------------------|----------------------------------------------------------------------------------------------------------------------------------------------------------------------------------------------------------------------------------------------------------------------------------------------------------------------------------------------------------------------------------------------------------------------------------------------------------------------------------------------|
| <b>Article 24</b>                                                                                                                                                                                                                                              | <b>KEYNOTE-045; Pembrolizumab versus Chemotherapy; Urothelial cancer</b>                                                                                                                                                                                                                                                                                                                                                                                                                     |
| <b>First author &amp; year of publication</b>                                                                                                                                                                                                                  | <b>Vaughn, 2018</b>                                                                                                                                                                                                                                                                                                                                                                                                                                                                          |
| <b>Stated purpose of article</b>                                                                                                                                                                                                                               | <i>In the phase III KEYNOTE-045 study, pembrolizumab significantly prolonged overall survival compared with investigator's choice of chemotherapy in patients with previously treated advanced urothelial cancer. Here, we report the results of health related quality-of-life (HRQoL) analyses from the KEYNOTE-045 trial.</i>                                                                                                                                                             |
| <b>What were PROs measuring?</b>                                                                                                                                                                                                                               |                                                                                                                                                                                                                                                                                                                                                                                                                                                                                              |
| What concepts were the PROs used in the study measuring?                                                                                                                                                                                                       | HRQoL                                                                                                                                                                                                                                                                                                                                                                                                                                                                                        |
| What rationale (if any) for selection of concept or constructs did the authors provide?                                                                                                                                                                        | Patients with urothelial cancer, in particular, report significant and clinically relevant decrements across all HRQoL domains, with the greatest difficulties related to fatigue and social and role functioning                                                                                                                                                                                                                                                                            |
| Were patients involved in the selection of outcomes measured by the PROs?                                                                                                                                                                                      | Not Reported                                                                                                                                                                                                                                                                                                                                                                                                                                                                                 |
| <b>Omissions</b>                                                                                                                                                                                                                                               |                                                                                                                                                                                                                                                                                                                                                                                                                                                                                              |
| Were there any important aspects of health (e.g., symptoms, function, perceptions) or quality of life (e.g. overall evaluation, satisfaction with life) that were omitted in this study from the perspectives of the patient, clinician, significant others... | Treatment-related adverse events – any grade [22]                                                                                                                                                                                                                                                                                                                                                                                                                                            |
| <b>If randomized trials and other studies measured PROs, what were the instruments' measurement strategies?</b>                                                                                                                                                |                                                                                                                                                                                                                                                                                                                                                                                                                                                                                              |
| Did investigators use instruments that yield a single indicator or index number, a profile, or a battery of instruments?                                                                                                                                       | EQ-5D and EORTC QLQ-C30                                                                                                                                                                                                                                                                                                                                                                                                                                                                      |
| If investigators measure PROs, did they use specific or generic measures, or both?                                                                                                                                                                             | Generic health status and cancer-specific                                                                                                                                                                                                                                                                                                                                                                                                                                                    |
| Who exactly completed the instruments?                                                                                                                                                                                                                         | patients                                                                                                                                                                                                                                                                                                                                                                                                                                                                                     |
| <b>Did the instruments work in the way they were supposed to work - validity?</b>                                                                                                                                                                              |                                                                                                                                                                                                                                                                                                                                                                                                                                                                                              |
| Had the instruments used been validated previously (provide reference)? Was evidence of prior validation for use in this population presented?                                                                                                                 | Not Reported                                                                                                                                                                                                                                                                                                                                                                                                                                                                                 |
| Were the instruments re-validated in this study?                                                                                                                                                                                                               | No                                                                                                                                                                                                                                                                                                                                                                                                                                                                                           |
| <b>Did the instruments work in the way they were supposed to work – ability to measure</b>                                                                                                                                                                     |                                                                                                                                                                                                                                                                                                                                                                                                                                                                                              |
| Are the PROs able to detect change in patient status, even if those changes are small?                                                                                                                                                                         | <i>Pembrolizumab prolonged TTD in HRQoL compared with chemotherapy. Patients who were treated with pembrolizumab had stable or improved global health status/quality of life, whereas those who were treated with investigator's choice of chemotherapy experienced declines in global health status/quality of life. Combined with efficacy and safety outcomes, these data support pembrolizumab as standard of care for patients with platinum-refractory advanced urothelial cancer.</i> |
| <b>Can you make the magnitude of effect (if any) understandable to readers?</b>                                                                                                                                                                                |                                                                                                                                                                                                                                                                                                                                                                                                                                                                                              |

|                                                                                                                                                       |    |
|-------------------------------------------------------------------------------------------------------------------------------------------------------|----|
| Can you provide an estimate of the difference in patients achieving a threshold of function or improvement, and the associated number needed to treat | NA |
|-------------------------------------------------------------------------------------------------------------------------------------------------------|----|

|                                                                                                                                                                                                                                                                |                                                                                                                                                                                                                                                                                                                                                                                                                |
|----------------------------------------------------------------------------------------------------------------------------------------------------------------------------------------------------------------------------------------------------------------|----------------------------------------------------------------------------------------------------------------------------------------------------------------------------------------------------------------------------------------------------------------------------------------------------------------------------------------------------------------------------------------------------------------|
| <b>Article 25</b>                                                                                                                                                                                                                                              | <b>15-592; Atezolizumab and Bevacizumab; Metastatic Renal Cell carcinoma</b>                                                                                                                                                                                                                                                                                                                                   |
| <b>First author &amp; year of publication</b>                                                                                                                                                                                                                  | <b>McGregor, 2019</b><br><i>*The article presents the results of a phase II study including PROs as an exploratory outcome.</i>                                                                                                                                                                                                                                                                                |
| <b>Stated purpose of article</b>                                                                                                                                                                                                                               | <i>In this multicenter phase II trial, we evaluated atezolizumab combined with bevacizumab in patients with advanced renal cell carcinoma (RCC) with variant histology or any RCC histology with ≥ 20% sarcomatoid differentiation.</i>                                                                                                                                                                        |
| <b>What were PROs measuring?</b>                                                                                                                                                                                                                               |                                                                                                                                                                                                                                                                                                                                                                                                                |
| What concepts were the PROs used in the study measuring?                                                                                                                                                                                                       | Quality of Life                                                                                                                                                                                                                                                                                                                                                                                                |
| What rationale (if any) for selection of concept or constructs did the authors provide?                                                                                                                                                                        | Not reported                                                                                                                                                                                                                                                                                                                                                                                                   |
| Were patients involved in the selection of outcomes measured by the PROs?                                                                                                                                                                                      | Not reported                                                                                                                                                                                                                                                                                                                                                                                                   |
| <b>Omissions</b>                                                                                                                                                                                                                                               |                                                                                                                                                                                                                                                                                                                                                                                                                |
| Were there any important aspects of health (e.g., symptoms, function, perceptions) or quality of life (e.g. overall evaluation, satisfaction with life) that were omitted in this study from the perspectives of the patient, clinician, significant others... | Treatment-related adverse events – any grade [23]                                                                                                                                                                                                                                                                                                                                                              |
| <b>If randomized trials and other studies measured PROs, what were the instruments' measurement strategies?</b>                                                                                                                                                |                                                                                                                                                                                                                                                                                                                                                                                                                |
| Did investigators use instruments that yield a single indicator or index number, a profile, or a battery or instruments?                                                                                                                                       | Battery: FKSI-19 and Brief Fatigue Inventory (BFI)                                                                                                                                                                                                                                                                                                                                                             |
| If investigators measure PROs, did they use specific or generic measures, or both?                                                                                                                                                                             | Disease-specific and symptom-specific                                                                                                                                                                                                                                                                                                                                                                          |
| Who exactly completed the instruments?                                                                                                                                                                                                                         |                                                                                                                                                                                                                                                                                                                                                                                                                |
| <b>Did the instruments work in the way they were supposed to work - validity?</b>                                                                                                                                                                              |                                                                                                                                                                                                                                                                                                                                                                                                                |
| Had the instruments used been validated previously (provide reference)? Was evidence of prior validation for use in this population presented?                                                                                                                 | Rao D, Butt Z, Rosenbloom S, et al: A comparison of the Renal Cell Carcinoma-Symptom Index (RCC-SI) and the Functional Assessment of Cancer Therapy- Kidney Symptom Index (FKSI). <i>J Pain Symptom Manage</i> 38:291-298, 2009<br>Mendoza TR, Wang XS, Cleeland CS, et al: The rapid assessment of fatigue severity in cancer patients: Use of the Brief Fatigue Inventory. <i>Cancer</i> 85: 1186-1196, 1999 |
| Were the instruments re-validated in this study?                                                                                                                                                                                                               | No                                                                                                                                                                                                                                                                                                                                                                                                             |
| <b>Did the instruments work in the way they were supposed to work – ability to measure</b>                                                                                                                                                                     |                                                                                                                                                                                                                                                                                                                                                                                                                |
| Are the PROs able to detect change in patient status, even if those changes are small?                                                                                                                                                                         | <i>This safety profile was comparable to our study and reinforced by the quality-of-life data, which suggests a lack of decline in quality of life with treatment</i>                                                                                                                                                                                                                                          |
| <b>Can you make the magnitude of effect (if any) understandable to readers?</b>                                                                                                                                                                                |                                                                                                                                                                                                                                                                                                                                                                                                                |
| Can you provide an estimate of the difference in patients achieving a threshold of function or improvement, and the associated number needed to treat                                                                                                          | NA                                                                                                                                                                                                                                                                                                                                                                                                             |

|                                                                                         |                                                                                                                                   |
|-----------------------------------------------------------------------------------------|-----------------------------------------------------------------------------------------------------------------------------------|
| <b>Article 26</b>                                                                       | <b>UPCC 25514; Pembrolizumab; Oligometastatic NSCLC</b>                                                                           |
| <b>First author &amp; year of publication</b>                                           | <b>Bauml, 2019</b><br><i>*The article presents the results of a phase II study including PROs as a secondary outcome.</i>         |
| <b>Stated purpose of article</b>                                                        | <i>Herein we report the outcomes of our trial, including the effects of PD-L1 status and CD8 T-cell infiltration on outcomes.</i> |
| <b>What were PROs measuring?</b>                                                        |                                                                                                                                   |
| What concepts were the PROs used in the study measuring?                                | Quality of life                                                                                                                   |
| What rationale (if any) for selection of concept or constructs did the authors provide? | Not reported                                                                                                                      |
| Were patients involved in the selection of outcomes measured by the PROs?               | Not reported                                                                                                                      |



|                                                                                                                                                                                                                                                                |                                                                                                                                                                                                  |
|----------------------------------------------------------------------------------------------------------------------------------------------------------------------------------------------------------------------------------------------------------------|--------------------------------------------------------------------------------------------------------------------------------------------------------------------------------------------------|
| <b>Omissions</b>                                                                                                                                                                                                                                               |                                                                                                                                                                                                  |
| Were there any important aspects of health (e.g., symptoms, function, perceptions) or quality of life (e.g. overall evaluation, satisfaction with life) that were omitted in this study from the perspectives of the patient, clinician, significant others... | Treatment-related adverse events – any grade [24]                                                                                                                                                |
| <b>If randomized trials and other studies measured PROs, what were the instruments' measurement strategies?</b>                                                                                                                                                |                                                                                                                                                                                                  |
| Did investigators use instruments that yield a single indicator or index number, a profile, or a battery or instruments?                                                                                                                                       | Single instrument: FACT-L                                                                                                                                                                        |
| If investigators measure PROs, did they use specific or generic measures, or both?                                                                                                                                                                             | Cancer-specific and disease-specific                                                                                                                                                             |
| Who exactly completed the instruments?                                                                                                                                                                                                                         |                                                                                                                                                                                                  |
| <b>Did the instruments work in the way they were supposed to work - validity?</b>                                                                                                                                                                              |                                                                                                                                                                                                  |
| Had the instruments used been validated previously (provide reference)? Was evidence of prior validation for use in this population presented?                                                                                                                 | Cella DF, Bonomi AE, Lloyd SR, Tulsy DS, Kaplan E, Bonomi P. Reliability and validity of the Functional Assessment of Cancer Therapy–Lung (FACT-L) quality of life instrument. Lung Cancer. 1995 |
| Were the instruments re-validated in this study?                                                                                                                                                                                                               | No                                                                                                                                                                                               |
| <b>Did the instruments work in the way they were supposed to work – ability to measure</b>                                                                                                                                                                     |                                                                                                                                                                                                  |
| Are the PROs able to detect change in patient status, even if those changes are small?                                                                                                                                                                         | <i>Pembrolizumab after LAT yielded no new safety signals and no reduction in quality of life</i>                                                                                                 |
| <b>Can you make the magnitude of effect (if any) understandable to readers?</b>                                                                                                                                                                                |                                                                                                                                                                                                  |
| Can you provide an estimate of the difference in patients achieving a threshold of function or improvement, and the associated number needed to treat                                                                                                          | NA                                                                                                                                                                                               |

|                                                                                                                                                                                                                                                                |                                                                                                                                                                                                                                                                                                           |
|----------------------------------------------------------------------------------------------------------------------------------------------------------------------------------------------------------------------------------------------------------------|-----------------------------------------------------------------------------------------------------------------------------------------------------------------------------------------------------------------------------------------------------------------------------------------------------------|
| <b>Article 27</b>                                                                                                                                                                                                                                              | <b>CheckMate 214; nivolumab plus ipilimumab vs sunitinib; Renal cell carcinoma</b>                                                                                                                                                                                                                        |
| <b>First author &amp; year of publication</b>                                                                                                                                                                                                                  | Cella, 2019                                                                                                                                                                                                                                                                                               |
| <b>Stated purpose of article</b>                                                                                                                                                                                                                               | Here, we describe further PRO results using the FKSI-19, Functional Assessment of Cancer Therapy-General (FACT-G), and EuroQol five dimensional three level (EQ-5D-3L) instruments                                                                                                                        |
| <b>What were PROs measuring?</b>                                                                                                                                                                                                                               |                                                                                                                                                                                                                                                                                                           |
| What concepts were the PROs used in the study measuring?                                                                                                                                                                                                       | Disease symptoms; HRQoL; general health status                                                                                                                                                                                                                                                            |
| What rationale (if any) for selection of concept or constructs did the authors provide?                                                                                                                                                                        | We aimed to assess whether health-related quality of life (HRQoL) could be used to further describe the benefit-risk profile of nivolumab plus ipilimumab versus sunitinib.                                                                                                                               |
| Were patients involved in the selection of outcomes measured by the PROs?                                                                                                                                                                                      | Not reported                                                                                                                                                                                                                                                                                              |
| <b>Omissions</b>                                                                                                                                                                                                                                               |                                                                                                                                                                                                                                                                                                           |
| Were there any important aspects of health (e.g., symptoms, function, perceptions) or quality of life (e.g. overall evaluation, satisfaction with life) that were omitted in this study from the perspectives of the patient, clinician, significant others... | Treatment-related adverse events – any grade [25]                                                                                                                                                                                                                                                         |
| <b>If randomized trials and other studies measured PROs, what were the instruments' measurement strategies?</b>                                                                                                                                                |                                                                                                                                                                                                                                                                                                           |
| Did investigators use instruments that yield a single indicator or index number, a profile, or a battery or instruments?                                                                                                                                       | Battery: FACT-G; FKSI-19; EQ-5D                                                                                                                                                                                                                                                                           |
| If investigators measure PROs, did they use specific or generic measures, or both?                                                                                                                                                                             | <b>Generic health status, cancer-specific, disease-specific</b>                                                                                                                                                                                                                                           |
| Who exactly completed the instruments?                                                                                                                                                                                                                         | Patients                                                                                                                                                                                                                                                                                                  |
| <b>Did the instruments work in the way they were supposed to work - validity?</b>                                                                                                                                                                              |                                                                                                                                                                                                                                                                                                           |
| Had the instruments used been validated previously (provide reference)? Was evidence of prior validation for use in this population presented?                                                                                                                 | <i>The FKSI-19 is a validated 19-item instrument that measures tumour- specific PROs in patients with kidney cancer.<br/>The FACT-G is a validated 27-item instrument that measures general cancer HRQoL<br/>The EQ-5D-3L is a validated, standardised instrument for measuring general health status</i> |

|                                                                                                                                                       |                                                                                                                                                                                                                                                                                                                                                                                                                                                                                                                                                                                                                                                                                                                                                                                                                                                                                                                                                                                                                                                                                                                                                                                                                                                                                                                                                                             |
|-------------------------------------------------------------------------------------------------------------------------------------------------------|-----------------------------------------------------------------------------------------------------------------------------------------------------------------------------------------------------------------------------------------------------------------------------------------------------------------------------------------------------------------------------------------------------------------------------------------------------------------------------------------------------------------------------------------------------------------------------------------------------------------------------------------------------------------------------------------------------------------------------------------------------------------------------------------------------------------------------------------------------------------------------------------------------------------------------------------------------------------------------------------------------------------------------------------------------------------------------------------------------------------------------------------------------------------------------------------------------------------------------------------------------------------------------------------------------------------------------------------------------------------------------|
|                                                                                                                                                       | <p>we used both a generic instrument designed for the general population (EQ-5D-3L) and cancer-specific instruments (FACT-G and FKS-19) to measure HRQoL.</p> <p>Given its generic nature, EQ-5D-3L might not detect small changes in health that are important for HRQoL studies in patients with cancer. We believe that future trials in advanced renal cell carcinoma could preferentially use the FKS-19 instrument, with the FACT-G and EQ-5D-3L also used depending on the interests of the investigating team.</p> <p>Rothrock NE, Jensen SE, Beaumont JL, et al. Development and initial validation of the NCCN/FACT symptom index for advanced kidney cancer. Value Health 2013</p> <p>Cella DF, Tulsky DS, Gray G, et al. The Functional Assessment of Cancer Therapy scale: development and validation of the general measure. J Clin Oncol 1993</p> <p>Euro-QoL Group. EuroQoL—a new facility for the measurement of health-related quality of life. Health Policy 1990</p> <p>Schrag A, Selai C, Jahanshahi M, Quinn NP. The EQ-5D—a generic quality of life measure—is a useful instrument to measure quality of life in patients with Parkinson’s disease. J Neurol Neurosurg Psychiatry 2000</p> <p>Cella D, Yount S, Brucker PS, et al. Development and validation of a scale to measure disease-related symptoms of kidney cancer. Value Health 2007</p> |
| Were the instruments re-validated in this study?                                                                                                      |                                                                                                                                                                                                                                                                                                                                                                                                                                                                                                                                                                                                                                                                                                                                                                                                                                                                                                                                                                                                                                                                                                                                                                                                                                                                                                                                                                             |
| <b>Did the instruments work in the way they were supposed to work – ability to measure</b>                                                            |                                                                                                                                                                                                                                                                                                                                                                                                                                                                                                                                                                                                                                                                                                                                                                                                                                                                                                                                                                                                                                                                                                                                                                                                                                                                                                                                                                             |
| Are the PROs able to detect change in patient status, even if those changes are small?                                                                | <p>all PRO scores after baseline were higher in participants in the nivolumab plus ipilimumab group than in those in the sunitinib group.</p> <p>Overall, PRO scores were maintained or improved from baseline with nivolumab plus ipilimumab throughout the trial.</p> <p>...analyses of changes from baseline over the first 103 weeks on study treatment showed improved HRQoL for nivolumab plus ipilimumab compared with sunitinib, with differences between treatment groups reaching significance at most timepoints for FKS-19 and FACT-G total scores and most domain scores</p>                                                                                                                                                                                                                                                                                                                                                                                                                                                                                                                                                                                                                                                                                                                                                                                   |
| <b>Can you make the magnitude of effect (if any) understandable to readers?</b>                                                                       |                                                                                                                                                                                                                                                                                                                                                                                                                                                                                                                                                                                                                                                                                                                                                                                                                                                                                                                                                                                                                                                                                                                                                                                                                                                                                                                                                                             |
| Can you provide an estimate of the difference in patients achieving a threshold of function or improvement, and the associated number needed to treat | NA                                                                                                                                                                                                                                                                                                                                                                                                                                                                                                                                                                                                                                                                                                                                                                                                                                                                                                                                                                                                                                                                                                                                                                                                                                                                                                                                                                          |

|                                                                                                                                                                                                                                                                |                                                                                                                                                                                                                                                                                                                                                                                                                                                                                                                                                                                                                                                                                          |
|----------------------------------------------------------------------------------------------------------------------------------------------------------------------------------------------------------------------------------------------------------------|------------------------------------------------------------------------------------------------------------------------------------------------------------------------------------------------------------------------------------------------------------------------------------------------------------------------------------------------------------------------------------------------------------------------------------------------------------------------------------------------------------------------------------------------------------------------------------------------------------------------------------------------------------------------------------------|
| <b>Article 28</b>                                                                                                                                                                                                                                              | <b>CheckMate 057; nivolumab vs docetaxel; non-squamous non-small cell lung cancer</b>                                                                                                                                                                                                                                                                                                                                                                                                                                                                                                                                                                                                    |
| <b>First author &amp; year of publication</b>                                                                                                                                                                                                                  | <b>Reck, 2018</b>                                                                                                                                                                                                                                                                                                                                                                                                                                                                                                                                                                                                                                                                        |
| <b>Stated purpose of article</b>                                                                                                                                                                                                                               | To evaluate health-related quality of life (HRQoL) with nivolumab or docetaxel using patient-reported outcomes.                                                                                                                                                                                                                                                                                                                                                                                                                                                                                                                                                                          |
| <b>What were PROs measuring?</b>                                                                                                                                                                                                                               |                                                                                                                                                                                                                                                                                                                                                                                                                                                                                                                                                                                                                                                                                          |
| What concepts were the PROs used in the study measuring?                                                                                                                                                                                                       | Disease-related symptoms and general health status                                                                                                                                                                                                                                                                                                                                                                                                                                                                                                                                                                                                                                       |
| What rationale (if any) for selection of concept or constructs did the authors provide?                                                                                                                                                                        | <p>advanced NSCLC is associated with a substantial symptom burden related to physical, social and psychological well-being. Poor health-related quality of life (HRQoL) at diagnosis and higher symptom burden at treatment initiation have been associated with shorter overall survival (OS) in patients with NSCLC. Therefore, prolonging OS while maintaining or improving HRQoL is an important treatment goal. Beyond traditional efficacy end-points (e.g. OS), HRQoL end-points based on patient-reported outcomes (PROs) data have become increasingly important for analysing novel therapies in clinical trials by providing the patient perspective on treatment benefit</p> |
| Were patients involved in the selection of outcomes measured by the PROs?                                                                                                                                                                                      | Not reported                                                                                                                                                                                                                                                                                                                                                                                                                                                                                                                                                                                                                                                                             |
| <b>Omissions</b>                                                                                                                                                                                                                                               |                                                                                                                                                                                                                                                                                                                                                                                                                                                                                                                                                                                                                                                                                          |
| Were there any important aspects of health (e.g., symptoms, function, perceptions) or quality of life (e.g. overall evaluation, satisfaction with life) that were omitted in this study from the perspectives of the patient, clinician, significant others... | Treatment-related adverse events – any grade [26]                                                                                                                                                                                                                                                                                                                                                                                                                                                                                                                                                                                                                                        |
| <b>If randomized trials and other studies measured PROs, what were the instruments' measurement strategies?</b>                                                                                                                                                |                                                                                                                                                                                                                                                                                                                                                                                                                                                                                                                                                                                                                                                                                          |
| Did investigators use instruments that yield a single indicator or index number, a profile, or a battery of instruments?                                                                                                                                       | Battery: Lung Cancer Symptom Scale (LCSS) and EQ-5D                                                                                                                                                                                                                                                                                                                                                                                                                                                                                                                                                                                                                                      |

Colomer-Lahiguera *et al. Journal of Patient-Reported Outcomes*

|                                                                                                                                                       |                                                                                                                                                                                                                                                                                                                                                                                                                                                                                                                                                                                                                     |
|-------------------------------------------------------------------------------------------------------------------------------------------------------|---------------------------------------------------------------------------------------------------------------------------------------------------------------------------------------------------------------------------------------------------------------------------------------------------------------------------------------------------------------------------------------------------------------------------------------------------------------------------------------------------------------------------------------------------------------------------------------------------------------------|
| If investigators measure PROs, did they use specific or generic measures, or both?                                                                    | Disease-specific and generic health status                                                                                                                                                                                                                                                                                                                                                                                                                                                                                                                                                                          |
| Who exactly completed the instruments?                                                                                                                | Patients                                                                                                                                                                                                                                                                                                                                                                                                                                                                                                                                                                                                            |
| <b>Did the instruments work in the way they were supposed to work - validity?</b>                                                                     |                                                                                                                                                                                                                                                                                                                                                                                                                                                                                                                                                                                                                     |
| Had the instruments used been validated previously (provide reference)? Was evidence of prior validation for use in this population presented?        | <i>using two validated patient-reported instruments</i><br><i>Given that advanced NSCLC is associated with distinct and challenging symptoms, general HRQoL instruments such as the EQ-5D may be less sensitive than lung cancer-specific instruments for assessment of PROs in this population.</i><br>Hollen P. Lung cancer symptom scale (LCSS). Charlottesville, VA: Quality of Life Research Associates, LLC; 2013<br>EuroQol Group. EuroQol d a new facility for the measurement of health-related quality of life. Health Policy 1990                                                                        |
| Were the instruments re-validated in this study?                                                                                                      |                                                                                                                                                                                                                                                                                                                                                                                                                                                                                                                                                                                                                     |
| <b>Did the instruments work in the way they were supposed to work – ability to measure</b>                                                            |                                                                                                                                                                                                                                                                                                                                                                                                                                                                                                                                                                                                                     |
| Are the PROs able to detect change in patient status, even if those changes are small?                                                                | Although the proportion of patients with disease-related symptom improvement, measured by the LCSS, by week 12 (a secondary study endpoint) was similar in the two treatment arms, data at subsequent assessments consistently showed alleviation of symptom burden during treatment with nivolumab, whereas treatment with docetaxel was generally associated with stabilisation or worsening of symptoms<br>Regardless of assessment instrument used in this study, nivolumab demonstrated improved HRQoL and symptom burden compared with docetaxel, and these improvements occur relatively early in treatment. |
| <b>Can you make the magnitude of effect (if any) understandable to readers?</b>                                                                       |                                                                                                                                                                                                                                                                                                                                                                                                                                                                                                                                                                                                                     |
| Can you provide an estimate of the difference in patients achieving a threshold of function or improvement, and the associated number needed to treat | NA                                                                                                                                                                                                                                                                                                                                                                                                                                                                                                                                                                                                                  |

**Table S6: PRO instruments completion rates**

| First author & year of publication | Name of study/trial (Trial ID)/Start of the trial | Total study sample size (n) | Control group (n) | Intervention group (n)                                              | PRO tool completion at baseline: -> Control group (n)   | PRO tool completion at baseline: -> Intervention group (n)                                                          | Last week reported | PRO tool completion at the end of the study: -> Control group (n) | PRO tool completion at the end of the study: -> Intervention group (n)                                              | Reasons for attrition reported in the study                                                                                                                           |
|------------------------------------|---------------------------------------------------|-----------------------------|-------------------|---------------------------------------------------------------------|---------------------------------------------------------|---------------------------------------------------------------------------------------------------------------------|--------------------|-------------------------------------------------------------------|---------------------------------------------------------------------------------------------------------------------|-----------------------------------------------------------------------------------------------------------------------------------------------------------------------|
| <i>von Tresckow, 2019</i>          | KEYNOTE-087 (NCT02453594) 2015                    | 210<br>206 PRO analysis     | NA                | Pembrolizumab<br>69 in cohort 1<br>79 in cohort 2<br>58 in cohort 3 | NA                                                      | QLQ-C30: 189/206<br>66/69 cohort 1<br>72/79 cohort 2<br>51/58 cohort 3<br>EQ-5D : numbers not reported, but similar | Week 36            | NA                                                                | QLQ-C30: 102/150<br>41/54 cohort 1<br>31/55 cohort 2<br>30/41 cohort 3<br>EQ-5D : numbers not reported, but similar | Discontinuation from the study due to adverse events, PD or death                                                                                                     |
| <i>Cella, 2016</i>                 | CheckMate-025 (NCT01668784) 2012                  | 821                         | 411               | 410 Nivolumab                                                       | FKSI: 343/344*<br>EQ-5D:344/344                         | FKSI-DRS: 361/362<br>EQ-5D:361/362                                                                                  | Week 104           | FKSI-DRS: 9/10 #<br>EQ-5D: 9/10                                   | FKSI-DRS: 20/26 #<br>EQ-5D: 20/26                                                                                   | At the end of treatment, in both groups, most patients who had discontinued treatment had done so because of disease progression                                      |
| <i>Schadendorf 2017</i>            | CheckMate-067 (NCT01844505) 2013                  | 945                         | NA                | 316 Nivolumab<br>315 Ipilimumab<br>314 Nivo+Ipi                     | NA                                                      | QLQ-C30:<br>N: 269/316<br>I: 259/315<br>N+I: 274/314<br>EQ-5D:<br>N: 267/316<br>I: 258/315<br>N+I: 274/314          | Week 79            | NA                                                                | QLQ-C30:<br>N: -<br>I: 1/2<br>N+I: 2/2<br>EQ-5D:<br>N: -<br>I: 2/2<br>N+I: 1/2                                      | Disease progression in the nivolumab and ipilimumab monotherapy groups and toxicity in Nivo+Ipi                                                                       |
| <i>Harrington, 2017</i>            | CheckMate-141 (NCT02105636) 2014                  | 361                         | 121               | 240 Nivolumab                                                       | QLQ-C30: 91/121<br>QLQ-H&N35: 91/121<br>EQ-5D: 90/121   | QLQ-C30: 191/240<br>QLQ-H&N35: 193/240<br>EQ-5D: 191/240                                                            | Week 69            | QLQ-C30: 0/0<br>QLQ-H&N35: 0/0<br>EQ-5D: 0/0                      | QLQ-C30: 2/2<br>QLQ-H&N35: 1/1<br>EQ-5D: 2/2                                                                        | Specific information about reasons patients did not complete questionnaires were not collected, because this was not specified in the protocol.                       |
| <i>Schadendorf 2016</i>            | KEYNOTE-002 (NCT01704287) 2012                    | 540                         | 167               | 177 Pembro.<br>10mg/kg<br>176 Pembro.<br>2mg/kg                     | QLQ-C30:<br>156/167                                     | QLQ-C30:<br>P. 10mg/kg: 170/177<br>P. 2mg/kg: 169/176                                                               | Week 36            | QLQ-C30:<br>21/72                                                 | QLQ-C30:<br>P. 10mg/kg: 39/75<br>P. 2mg/kg: 33/69                                                                   | Disease progression or adverse events, death, and site administrative error                                                                                           |
| <i>Petrella, 2017</i>              | KEYNOTE-006 (NCT1866319) 2013                     | 834                         | NA                | 270 Pembro.<br>Q2W<br>266 Pembro.<br>Q3W<br>240 Ipilimumab          | NA                                                      | QLQ-C30:<br>P. Q2W: 267/270<br>P. Q3W: 263/266<br>Ipilimumab: 237/240                                               | Week 36            | NA                                                                | QLQ-C30:<br>P. Q2W: 112/143<br>P. Q3W: 120/131<br>Ipilimumab: 54/128                                                | Disease progression, adverse event, or death                                                                                                                          |
| <i>Brahmer, 2017</i>               | KEYNOTE-024 (NCT02142738) 2014                    | 305                         | 148               | 151 Pembrolizumab                                                   | QLQ-C30: 137/148<br>QLQ-LC13: 136/148<br>EQ-5D: 137/148 | QLQ-C30: 145/151<br>QLQ-LC13: 145/151<br>EQ-5D: 144/151                                                             | Week 24            | QLQ-C30: 75/92<br>QLQ-LC13: 75/92<br>EQ-5D:75/92                  | QLQ-C30: 98/111<br>QLQ-LC13: 98/111<br>EQ-5D: 98/111                                                                | Death, adverse events, or disease progression                                                                                                                         |
| <i>Long, 2016</i>                  | CheckMate-066 (NCT01721772) 2013                  | 418                         | 208               | 210 Nivolumab                                                       | QLQ-C30: 135/208<br>EQ-5D: 135/208                      | QLQ-C30: 147/210<br>EQ-5D: 146/210                                                                                  | Week 73            | QLQ-C30: 0/0<br>EQ-5D: 0/0                                        | QLQ-C30: 1/1<br>EQ-5D: 1/1                                                                                          | The high attrition rate in the dacarbazine arm, possibly due to death and/or disease progression                                                                      |
| <i>Revicki, 2012</i>               | MDX010-20 (NCT00094653) 2004                      | 676                         | 136 (gp100)       | 137 Ipilimumab<br>403 Ipi+gp100                                     | Numbers not reported<br>Compliance of 95%               |                                                                                                                     | Week 12            | QLQ-C30:<br>gp100: 80                                             | QLQ-C30:<br>Ipilimumab: 85<br>Ipi+gp100: 236                                                                        | Missing HRQL data at baseline were due to administrative errors. Reasons for missing Week 12 data were primarily due to disease progression, adverse events, or death |

Colomer-Lahiguera *et al.* Journal of Patient-Reported Outcomes

| First author & year of publication | Name of study/trial (Trial ID)/Start of the trial | Total study sample size (n)        | Control group (n)                         | Intervention group (n)                                                   | PRO tool completion at baseline: -> Control group (n)  | PRO tool completion at baseline: -> Intervention group (n)                                                                            | Last week reported | PRO tool completion at the end of the study: -> Control group (n)          | PRO tool completion at the end of the study: -> Intervention group (n)                                                               | Reasons for attrition reported in the study                                                                                        |
|------------------------------------|---------------------------------------------------|------------------------------------|-------------------------------------------|--------------------------------------------------------------------------|--------------------------------------------------------|---------------------------------------------------------------------------------------------------------------------------------------|--------------------|----------------------------------------------------------------------------|--------------------------------------------------------------------------------------------------------------------------------------|------------------------------------------------------------------------------------------------------------------------------------|
| Coens, 2017                        | EORTC-18071 (NCT00636168) 2008                    | 951                                | 476                                       | 475 Ipilimumab                                                           | QLQ-C30: 444/476                                       | QLQ-C30: 449/475                                                                                                                      | Week 108           | QLQ-C30: 187/338                                                           | QLQ-C30: 167/359                                                                                                                     | Administrative failure (either by patient or staff), accounting for 962 (55%) of 1752 reasons reported for missing questionnaires. |
| Reck, 2017                         | CheckMate 017 (NCT01642004) 2012                  | 272                                | 135                                       | 137 Nivolumab                                                            | LCSS:106/137<br>EQ-5D:107/137                          | LCSS:106/135<br>EQ-5D:110/135                                                                                                         | Week 98            | LCSS:1/1<br>EQ-5D:1/1                                                      | LCSS:na<br>EQ-5D:na                                                                                                                  | Incomplete patient participation at each time point, reasons not reported                                                          |
| Reck, 2018                         | CheckMate 057 (NCT01673867) 2012                  | 582                                | 290                                       | 292 Nivolumab                                                            | LCSS:222/290<br>EQ-5D:232/290                          | LCSS:240/292<br>EQ-5D:244/292                                                                                                         | Week 108           | LCSS: 0<br>EQ-5D: 0                                                        | LCSS:1/2<br>EQ-5D:1/2                                                                                                                | Incomplete patient participation at each time point, reasons not reported                                                          |
| Spigel, 2019                       | CheckMate 153 (NCT02066636) 2014                  | 1426                               | NA                                        | 1426 Nivolumab                                                           | N/A                                                    | LCSS: 1095/1099<br>EQ-5D: 1095/1099                                                                                                   | Week 42            | N/A                                                                        | LCSS: 246/299<br>EQ-5D: 246/299                                                                                                      | Incomplete patient participation at each time point, reasons not reported                                                          |
| Cella, 2019                        | CheckMate 214 (NCT022317) 2014                    | 1096                               | 422 (intermediate and poor risk patients) | 425 Nivolumab+Ipilimumab (intermediate and poor risk patients)           | FKSI-19: 400/422<br>FACT-G: 400/422<br>EQ-5D: 403/422  | FKSI-19: 413/425<br>FACT-G: 412/425<br>EQ-5D: 415/425                                                                                 | Week 133           | FKSI-19: 1/1<br>FACT-G: 1/1<br>EQ-5D: 1/1                                  | FKSI-19: 1/1<br>FACT-G: 1/1<br>EQ-5D: 1/1                                                                                            | Treatment discontinuation due to adverse events                                                                                    |
| Reck, 2019                         | CheckMate 227 (NCT02477826) 2015                  | 1166                               | 583                                       | 583 Nivolumab+Ipilimumab                                                 | LCSS:542/583<br>EQ-5D: 542/583                         | LCSS:540/583<br>EQ-5D:543/583                                                                                                         | Week 102           | LCSS:4/4<br>EQ-5D: 4/4                                                     | LCSS: 5/5<br>EQ-5D: 5/5                                                                                                              | Exclusion of data on patients who discontinued therapy                                                                             |
| Wendel Naumann, 2019               | CheckMate 358 (NCT02488759) 2015                  | 24 (19 cervical; 5 vaginal/vulvar) | NA                                        | 24 Nivolumab                                                             | NA                                                     | QLQ-C30 : 16/19<br>EQ-5D : 18/19 (only reported for cervical cohort)                                                                  | Week 9             | NA                                                                         | QLQ-C30 : 13/19<br>EQ-5D : 13/19 (only reported for cervical cohort)                                                                 | Not reported                                                                                                                       |
| Mansfield, 2020                    | IMpower133 (NCT027635) 2016                       | 403                                | 202                                       | 201 Atezolizumab+Arboplatin/Etoposide                                    | QLQ-C30: 179/202<br>QLQ-LC13: 176/202                  | QLQ-C30:175/201<br>QLQ-LC13:168/201                                                                                                   | Week 54            | 34remained on study treatment and were eligible to complete PRO assessment |                                                                                                                                      | Relatively small number of patients eligible for PRO assessment at later time points, reasons not reported                         |
| Kaufmann, 2017 §                   | JAVELIN Merkel 20 (NCT02155647) 2014              | 88                                 | NA                                        | 88 Avelumab                                                              | NA                                                     | FACT-M: 70/88<br>EQ-5D: 72/88                                                                                                         | Week 25            | NA                                                                         | FACT-M: 31<br>EQ-5D: 32                                                                                                              | QoL only assessed until disease progression, no other reasons for non-completion reported                                          |
| Barlesi, 2018                      | KEYNOTE-010 (NCT01905657) 2013                    | 1034                               | 293                                       | 329 Pembro. 10mg/kg<br>331 Pembro. 2mg/kg for tumor proportion score ≥ 1 | QLQ-C30:273/293<br>QLQ-LC13: 273/293<br>EQ-5D: 237/255 | QLQ-C30: 10mg/kg:311/329<br>2mg/kg:318/331<br>QLQ-LC13: 10mg/kg:319/331<br>2mg/kg:311/329<br>EQ-5D: 10mg/kg:293/310<br>2mg/kg:296/306 | Week 36            | QLQ-C30:21/293#<br>QLQ-LC13: 21/293#<br>EQ-5D: 13/255#                     | QLQ-C30: 10mg/kg:77/329#<br>2mg/kg:71/331#<br>QLQ-LC13: 10mg/kg:76/331#<br>2mg/kg:69/329<br>EQ-5D: 10mg/kg:65/310#<br>2mg/kg:58/306# | Disease progression, physician decision, adverse events or death                                                                   |

Colomer-Lahiguera *et al.* Journal of Patient-Reported Outcomes

| First author & year of publication | Name of study/trial (Trial ID)/Start of the trial | Total study sample size (n) | Control group (n) | Intervention group (n)                                                         | PRO tool completion at baseline: -> Control group (n)       | PRO tool completion at baseline: -> Intervention group (n)  | Last week reported | PRO tool completion at the end of the study: -> Control group (n) | PRO tool completion at the end of the study: -> Intervention group (n) | Reasons for attrition reported in the study                                                                                                                                 |
|------------------------------------|---------------------------------------------------|-----------------------------|-------------------|--------------------------------------------------------------------------------|-------------------------------------------------------------|-------------------------------------------------------------|--------------------|-------------------------------------------------------------------|------------------------------------------------------------------------|-----------------------------------------------------------------------------------------------------------------------------------------------------------------------------|
| Vaughn, 2018 §                     | KEYNOTE 045 (NCT02256436) 2014                    | 542<br>519 QoL analysis     | 253               | 266<br>Pembrolizumab                                                           | QLQ-C30 and / or EQ-5D: 242/253                             | QLQ-C30 and /or EQ-5D: 260/266                              | Week 51            | QLQ-C30 and/or EQ-5D: 7                                           | QLQ-C30 and/or EQ-5D : 56                                              | Reasons why not included in primary analysis (at week 15) were: Disease progression, physician decision, adverse events, visit not scheduled or medication exclusion        |
| Mazieres, 2019                     | KEYNOTE 407 (NCT02775435) 2016                    | 559                         | 280               | 278<br>Pembrolizumab + Chemotherapy (Carboplatin+Paclitaxel or nab-Paclitaxel) | QLQ-C30:264/278<br>QLQ-LC13: 263/268<br>EQ-5D: not reported | QLQ-C30:254/276<br>QLQ-LC13: 252/275<br>EQ-5D: not reported | Week 18            | QLQ-C30:162/187<br>QLQ-LC13: 162/187<br>EQ-5D: not reported       | QLQ-C30:191/217<br>QLQ-LC13: 191/217<br>EQ-5D: not reported            | Adverse events, physician decision, disease progression, study withdrawal, or death, or patient had no scheduled visit                                                      |
| Bordoni, 2018                      | OAK (NCT02008227) 2014                            | 850                         | 425               | 425<br>Atezolizumab                                                            | QLQ-C30 and LC13:388/402                                    | QLQ-C30 and LC13:413/421                                    | Cycle 6 (week 18)  | QLQ-C30 and LC13:151/156                                          | QLQ-C30 and LC13:225/232                                               | Patients did not complete form because of patient refusal or other reason                                                                                                   |
| Hui 2019                           | PACIFIC (NCT02125461) 2014                        | 713                         | 237               | 476<br>Durvalumab                                                              | QLQ-C30:232/237<br>QLQ-LC13: 232/237<br>EQ-5D: not reported | QLQ-C30:474/476<br>QLQ-LC13: 472/476<br>EQ-5D: not reported | Week 48            | QLQ-C30:88/102<br>QLQ-LC13: 88/102<br>EQ-5D: not reported         | QLQ-C30:254/304<br>QLQ-LC13: 254/304<br>EQ-5D: not reported            | Treatment discontinuation due to disease progression, adverse event, withdrawal, protocol non-adherence, meeting trial-specific criteria for discontinuation, other reasons |
| O'Donnell, 2019 §                  | Study 1108 (NCT01693562) 2012                     | 191                         | NA                | 191<br>Durvalumab (182 PRO assessment)                                         | NA                                                          | FACT-BI :169/182<br>QLQ-C30:113/182                         | Day 337            | NA                                                                | FACT-BI :10<br>QLQ-C30:7                                               | Not reported<br>Completion was lower than for FACT-BI because it was added to the protocol after study start and not administered at all scheduled visits                   |
| McGregor, 2019 §                   | 15-592 (NCT02724878) 2016                         | 60                          | NA                | 60<br>Atezolizumab+ bevacizumab                                                | NA                                                          | FKSI-19:60/60<br>BFI:59/60                                  | End of therapy     | NA                                                                | FKSI-19:29<br>BFI:13                                                   | Discontinuation of therapy, toxicity, disease progression death; not reported for PRO completion                                                                            |
| Bauml, 2019 §                      | UPCC 25514 (NCT02316002) 2105                     | 51                          | NA                | 45 received pembrolizumab                                                      | NA                                                          | FACT-L: 38/45                                               | Cycle 16           | NA                                                                | FACT-L: 13                                                             | Not reported                                                                                                                                                                |

\*The total for PRO completion is for all randomised patients with non-missing data at baseline and data from at least one post-baseline visit.

# The total number of patients have been calculated based on the percentage of completion provided in the study

§ These publications do not provide the total number remaining at the end of the study

**Table S7: Symptom-related content of PRO instruments**

| EQ-5D             | EORTC QLQ-       | FACT-G         | FACT-L          | FACT-BL          | FACT-M            | FKSI-DRS        | FKSI-19           | QLQ-LC13         | QLQ-H&N35        | LCSS             | SDS                            |
|-------------------|------------------|----------------|-----------------|------------------|-------------------|-----------------|-------------------|------------------|------------------|------------------|--------------------------------|
| Pain / discomfort | Fatigue          | Lack of energy | Lack of energy  | Lack of energy   | Lack of energy    | Lack of energy  | Lack of energy    | Fatigue          | Fatigue          | Loss of appetite | Nausea                         |
| Anxiety /         | Dyspnea          | Nausea         | Nausea          | Nausea           | Nausea            | Pain            | Pain              | Dyspnea          | Dyspnea          | Fatigue          | Nausea (severity)              |
|                   | Pain             | Pain           | Pain            | Pain             | Pain              | Weight loss     | Weight loss       | Pain             | Pain             | Cough            | Appetite                       |
|                   | Insomnia         | Feel ill       | Feel ill        | Feel ill         | Feel ill          | Bone pain       | Fatigue           | Insomnia         | Insomnia         | Shortness of     | Insomnia                       |
|                   | Weakness         | Sad            | Sad             | Sad              | Sad               | Fatigue         | Short of breath   | Weakness         | Weakness         | Pain             | Pain (frequency)               |
| <b>SF-36</b>      | Lack of appetite | Nervous        | Nervous         | Nervous          | Nervous           | Short of breath | Fevers            | Lack of appetite | Lack of appetite | Hemoptysis       | Pain (severity)                |
| Anxiety /         | Nausea           | Sleeping well  | Sleeping well   | Sleeping well    | Sleeping well     | Cough           | Bone pain         | Nausea           | Nausea           |                  | Fatigue                        |
| Pain              | Vomiting         |                | Short of breath | Trouble          | Pain at my        | Fevers          | Cough             | Vomiting         | Vomiting         |                  | Bowel                          |
| Energy            | Constipation     |                | Losing weight   | controlling my   | melanoma site or  | Blood in urine  | Weak all over     | Constipation     | Constipation     |                  | Concentration                  |
| Tired             | Diarrhea         |                | Clear thinking  | Losing weight    | skin (lumps,      |                 | Blood in urine    | Diarrhea         | Diarrhea         |                  | Breathing                      |
|                   | Memory           |                | Cough           | Control of my    | changes in my     |                 | Good appetite     | Memory           | Memory           |                  | Cough                          |
|                   | Concentration    |                | Hair loss       | bowels           | Short of breath   |                 | Sleeping well     | Concentration    | Concentration    |                  |                                |
|                   | Irritability     |                | Good appetite   | Urinate more     | Headaches         |                 | Nausea            | Irritability     | Irritability     |                  |                                |
|                   | Depression       |                | Tightness in    | frequently       | Fevers            |                 | Diarrhea          | Depression       | Depression       |                  | <b>FACIT-Fatigue</b>           |
|                   |                  |                | Difficulty      | Diarrhea         | Swelling or       |                 | Good appetite     | Cough            | Pain mouth       |                  |                                |
|                   |                  |                |                 | Good appetite    | cramps in my      |                 | Burns when I      | Dyspnea          | Swallowing       |                  |                                |
|                   |                  |                |                 | urinate          | Good appetite     |                 | Aches and pains   | Swallowing       | Soreness mouth   |                  | <b>Brief Fatigue Inventory</b> |
|                   |                  |                |                 | Able to have and | Aches and pains   |                 | in my bones       | Alopecia         | Dry mouth        |                  |                                |
|                   |                  |                |                 | maintain an      | Blood in my stool |                 | Blood in my stool | Pain             | Sticky saliva    |                  |                                |
|                   |                  |                |                 | erection         | Memory /          |                 | Memory /          | Soreness         | Smell            |                  |                                |
|                   |                  |                |                 |                  | concentration     |                 | concentration     | Tingling         | Taste            |                  | <b>Pain (single question)</b>  |
|                   |                  |                |                 |                  | Fatigue           |                 | Fatigue           |                  | Cough            |                  |                                |
|                   |                  |                |                 |                  | <i>SURGERY</i>    |                 |                   |                  | Hoarsening       |                  |                                |
|                   |                  |                |                 |                  | Swelling at my    |                 |                   |                  | Libido           |                  |                                |
|                   |                  |                |                 |                  | melanoma site     |                 |                   |                  | Weight loss      |                  |                                |
|                   |                  |                |                 |                  | Numbness          |                 |                   |                  | Weight gain      |                  |                                |
|                   |                  |                |                 |                  | Good range of     |                 |                   |                  |                  |                  |                                |
|                   |                  |                |                 |                  | movement          |                 |                   |                  |                  |                  |                                |

**Table S8: AEs reported in selected ICI-CT**

| CheckMate 057 nonsquamous NSCLC |           |          |   |    |
|---------------------------------|-----------|----------|---|----|
| Total participants              |           | 287      |   |    |
| Niv_3 mg/kg                     | Any grade | Grade ≥3 |   |    |
| AE                              | n         | %        | n | %  |
| Fatigue                         | 46        | 16       | 3 | 1  |
| Nausea                          | 34        | 12       | 2 | 1  |
| Dec. appetite                   | 30        | 10       | 0 | 0  |
| Asthenia                        | 29        | 10       | 1 | <1 |
| Diarrhea                        | 22        | 8        | 2 | 1  |
| Peripheral edema                | 8         | 3        | 0 | 0  |
| Myalgia                         | 7         | 2        | 1 | <1 |
| Anemia                          | 6         | 2        | 1 | <1 |
| Alopecia                        | 1         | <1       | 0 | 0  |
| Neutropenia                     | 1         | <1       | 0 | 0  |
| Febrile neutropenia             | 0         | 0        | 0 | 0  |
| Leukopenia                      | 0         | 0        | 0 | 0  |

observed in 10% or more of patients  
Borghaei et al., NEJM, 2015

| CheckMate 141 Head & Neck |           |          |   |    |
|---------------------------|-----------|----------|---|----|
| Total participants        |           | 236      |   |    |
| Niv_2 mg/kg               | Any grade | Grade ≥3 |   |    |
| AE                        | n         | %        | n | %  |
| Fatigue                   | 33        | 14       | 5 | 2  |
| Nausea                    | 20        | 8        | 0 | 0  |
| Rash                      | 18        | 8        | 0 | 0  |
| Dec. appetite             | 17        | 7        | 0 | 0  |
| Pruritus                  | 17        | 7        | 0 | 0  |
| Diarrhea                  | 16        | 7        | 0 | 0  |
| Anemia                    | 12        | 5        | 3 | 1  |
| Asthenia                  | 10        | 4        | 1 | <1 |
| Vomiting                  | 8         | 3        | 0 | 0  |
| Dry skin                  | 7         | 3        | 0 | 0  |
| Stomatitis                | 5         | 2        | 1 | <1 |
| Weight loss               | 4         | 2        | 0 | 0  |
| Mucosal inflammation      | 3         | 1        | 0 | 0  |
| neurologic/neuropathy     | 1         | <1       | 0 | 0  |
| Alopecia                  | 0         | 0        | 0 | 0  |
| Neutropenia               | 0         | 0        | 0 | 0  |

observed in 5% or more of patients  
Ferris et al., NEJM, 2016

| Impower 133 SCLC          |             |          |    |    |
|---------------------------|-------------|----------|----|----|
| Total participants        |             | 198      |    |    |
| Atezo 1200 mg             | Any grade * | Grade ≥3 |    |    |
| AE                        | n           | %        | n  | %  |
| Anemia                    | 77          | 39       | 28 | 14 |
| Neutropenia               | 72          | 36       | 46 | 23 |
| Alopecia                  | 69          | 35       | 0  | 0  |
| Nausea                    | 63          | 32       | 1  | <1 |
| Fatigue                   | 42          | 21       | 3  | 2  |
| Dec. appetite             | 41          | 21       | 2  | 1  |
| Dec. neutrophil count     | 35          | 18       | 28 | 14 |
| Thrombocytopenia          | 32          | 16       | 20 | 10 |
| Vomiting                  | 27          | 14       | 2  | 1  |
| Leukopenia                | 25          | 13       | 10 | 5  |
| Dec. platelet count       | 24          | 12       | 7  | 4  |
| Constipation              | 20          | 10       | 1  | <1 |
| Diarrhea                  | 19          | 10       | 4  | 2  |
| Dec. white-cell count     | 16          | 8        | 6  | 3  |
| Infusion-related reaction | 10          | 5        | 4  | 2  |
| Febrile neutropenia       | 6           | 3        | 6  | 3  |

observed in 10% or more of patients  
Horn et al., NEJM, 2018

| KEYNOTE-407 squamous NSCLC |           |          |    |    |
|----------------------------|-----------|----------|----|----|
| Total participants         |           | 278      |    |    |
| Pem 200 mg + Chemo         | Any grade | Grade ≥3 |    |    |
| AE                         | n         | %        | n  | %  |
| Anemia                     | 148       | 53       | 43 | 16 |
| Alopecia                   | 128       | 46       | 1  | <1 |
| Neutropenia                | 105       | 38       | 63 | 23 |
| Nausea                     | 99        | 36       | 3  | 1  |
| Thrombocytopenia           | 85        | 31       | 19 | 7  |
| Diarrhea                   | 83        | 30       | 11 | 4  |
| Dec. appetite              | 68        | 25       | 6  | 2  |
| Constipation               | 64        | 23       | 2  | <1 |
| Fatigue                    | 63        | 23       | 9  | 3  |
| Asthenia                   | 60        | 22       | 6  | 2  |
| Arthralgia                 | 57        | 21       | 4  | 1  |
| Peripheral neuropathy      | 57        | 21       | 3  | 1  |
| Vomiting                   | 45        | 16       | 1  | <1 |
| Cough                      | 37        | 13       | 2  | <1 |
| Dyspnea                    | 36        | 13       | 4  | 1  |

observed in 15% or more of patients  
Paz-Ares et al., NEJM, 2018

| 15-592 renal-cell carcinoma |           |          |   |   |
|-----------------------------|-----------|----------|---|---|
| Total participants          |           | 60       |   |   |
| Atezo 1200 mg               | Any grade | Grade ≥3 |   |   |
| AE                          | n         | %        | n | % |
| Fatigue                     | 21        | 35       | 1 |   |
| Proteinuria                 | 21        | 35       | 2 |   |
| Musculoskeletal pain        | 20        | 33       | 0 |   |
| Diarrhea                    | 13        | 22       | 6 |   |
| Rash/skin condition         | 12        | 20       | 0 |   |
| Hypertension                | 11        | 18       | 2 |   |
| Pruritus                    | 11        | 18       | 0 |   |
| Thyroid disorder            | 10        | 17       | 0 |   |
| Hepatitis                   | 9         | 15       | 2 |   |
| Fever                       | 8         | 13       | 1 |   |
| Mucositis                   | 7         | 12       | 2 |   |
| Myalgia                     | 7         | 12       | 0 |   |

observed in 10% or more of patients  
McGregor et al., JCO, 2019

| CheckMate 025 renal-cell carcinoma |           |          |    |    |
|------------------------------------|-----------|----------|----|----|
| Total participants                 |           | 406      |    |    |
| Niv_3 mg/kg                        | Any grade | Grade ≥3 |    |    |
| AE                                 | n         | %        | n  | %  |
| Fatigue                            | 134       | 33       | 10 | 2  |
| Nausea                             | 57        | 14       | 1  | <1 |
| Pruritus                           | 57        | 14       | 0  | 0  |
| Diarrhea                           | 50        | 12       | 5  | 1  |
| Dec. appetite                      | 48        | 12       | 2  | <1 |
| Rash                               | 41        | 10       | 2  | <1 |
| Cough                              | 36        | 9        | 0  | 0  |
| Anemia                             | 32        | 8        | 7  | 2  |
| Dyspnea                            | 30        | 7        | 3  | <1 |
| Peripheral edema                   | 17        | 4        | 0  | 0  |
| Pneumonitis                        | 16        | 4        | 6  | 1  |
| Dysgeusia                          | 11        | 3        | 0  | 0  |
| Mucosal inflammation               | 11        | 3        | 0  | 0  |
| Hyperglycemia                      | 9         | 2        | 5  | 1  |
| Stomatitis                         | 8         | 2        | 0  | 0  |
| Hypertriglyceridemia               | 5         | 1        | 0  | 0  |
| Epistaxis                          | 3         | <1       | 0  | 0  |

observed in 10% or more of patients  
Motzer et al., NEJM, 2015

| CheckMate 214 renal-cell carcinoma |           |          |    |    |
|------------------------------------|-----------|----------|----|----|
| Total participants                 |           | 547      |    |    |
| Niv_3 mg/kg+ipi_1 mg/kg            | Any grade | Grade ≥3 |    |    |
| AE                                 | n         | %        | n  | %  |
| Fatigue                            | 202       | 37       | 23 | 4  |
| Pruritus                           | 154       | 28       | 3  | <1 |
| Diarrhea                           | 145       | 27       | 21 | 4  |
| Rash                               | 118       | 22       | 8  | 1  |
| Nausea                             | 109       | 20       | 8  | 1  |
| Inc. lipase level                  | 90        | 16       | 56 | 10 |
| Hypothyroidism                     | 85        | 16       | 2  | <1 |
| Dec. appetite                      | 75        | 14       | 7  | 1  |
| Asthenia                           | 72        | 13       | 8  | 1  |
| Vomiting                           | 59        | 11       | 4  | <1 |
| Anemia                             | 34        | 6        | 2  | <1 |
| Dysgeusia                          | 31        | 6        | 0  | 0  |
| Stomatitis                         | 23        | 4        | 0  | 0  |
| Dyspepsia                          | 15        | 3        | 0  | 0  |
| Mucosal inflammation               | 13        | 2        | 0  | 0  |
| Hypertension                       | 12        | 2        | 4  | <1 |
| Palmar-plantar erythro             | 5         | <1       | 0  | 0  |
| Thrombocytopenia                   | 2         | <1       | 0  | 0  |

observed in 15% or more of patients  
Motzer et al., NEJM, 2018

| CheckMate 017 squamous-cell NSCLC |           |          |   |   |
|-----------------------------------|-----------|----------|---|---|
| Total participants                |           | 131      |   |   |
| Niv_3 mg/kg                       | Any grade | Grade ≥3 |   |   |
| AE                                | n         | %        | n | % |
| Fatigue                           | 21        | 16       | 1 | 1 |
| Dec. appetite                     | 14        | 11       | 1 | 1 |
| Asthenia                          | 13        | 10       | 0 | 0 |
| Nausea                            | 12        | 9        | 0 | 0 |
| Diarrhea                          | 10        | 8        | 0 | 0 |
| Arthralgia                        | 7         | 5        | 0 | 0 |
| Pyrexia                           | 6         | 5        | 0 | 0 |
| Pneumonitis                       | 6         | 5        | 0 | 0 |
| Rash                              | 5         | 4        | 0 | 0 |
| Mucosal inflammation              | 3         | 2        | 0 | 0 |
| Myalgia                           | 2         | 2        | 0 | 0 |
| Anemia                            | 2         | 2        | 0 | 0 |
| peripheral neuropathy             | 1         | 1        | 0 | 0 |
| Leukopenia                        | 1         | 1        | 1 | 1 |
| Neutropenia                       | 1         | 1        | 0 | 0 |
| Febrile neutropenia               | 0         | 0        | 0 | 0 |
| Alopecia                          | 0         | 0        | 0 | 0 |

observed in 5% or more of patients  
Brahmer et al., NEJM, 2015

| KEYNOTE-045 urothelial carcinoma |           |          |   |    |
|----------------------------------|-----------|----------|---|----|
| Total participants               |           | 266      |   |    |
| Pem_200 mg                       | Any grade | Grade ≥3 |   |    |
| AE                               | n         | %        | n | %  |
| Pruritus                         | 52        | 20       | 0 | 0  |
| Fatigue                          | 37        | 14       | 3 | 1  |
| Nausea                           | 29        | 11       | 1 | <1 |
| Diarrhea                         | 24        | 9        | 3 | 1  |
| Dec. appetite                    | 23        | 9        | 0 | 0  |
| Hypothyroidism                   | 17        | 6        | 0 | 0  |
| Asthenia                         | 15        | 6        | 1 | <1 |
| Pneumonitis                      | 11        | 4        | 6 | 2  |
| Rash                             | 9         | 3        | 2 | <1 |
| Colitis                          | 6         | 2        | 3 | 1  |
| Constipation                     | 6         | 2        | 0 | 0  |
| Nephritis                        | 2         | <1       | 2 | <1 |
| Severe skin reaction             | 2         | <1       | 1 | <1 |
| Thyroiditis                      | 2         | <1       | 0 | 0  |
| Preripheral sensory neur         | 2         | <1       | 0 | 0  |
| Dec. neutrophil count            | 1         | <1       | 1 | <1 |
| Adrenal insufficiency            | 1         | <1       | 1 | <1 |
| Peripheral neuropathy            | 1         | <1       | 0 | 0  |

observed in 10% or more of patients  
Bellmunt et al., NEJM, 2017

| UPCC 25514 oligometastatic NSCLC |           |          |   |   |
|----------------------------------|-----------|----------|---|---|
| Total participants               |           | 45       |   |   |
| Pem_200 mg                       | Any grade | Grade ≥3 |   |   |
| AE                               | n         | %        | n | % |
| Pain                             | 19        | 42       | 1 | 2 |
| Fatigue                          | 16        | 36       | 0 | 0 |
| Rash/skin condition              | 10        | 22       | 0 | 0 |
| Dyspnea                          | 8         | 18       | 1 | 2 |
| Cough                            | 7         | 16       | 0 | 0 |
| Pruritus                         | 7         | 16       | 0 | 0 |
| Dizziness                        | 6         | 13       | 0 | 0 |
| Edema                            | 6         | 13       | 0 | 0 |
| Nausea                           | 6         | 13       | 1 | 2 |
| Pneumonitis                      | 5         | 11       | 3 | 7 |
| Dry eyes                         | 5         | 11       | 0 | 0 |
| Headache                         | 5         | 11       | 0 | 0 |
| Insomnia                         | 5         | 11       | 0 | 0 |

observed in 10% or more of patients  
Bauml et al., JAMA Oncology, 2019

\* "Any grade" was calculated adding all grades



| CheckMate 066          |           | melanoma |      |
|------------------------|-----------|----------|------|
| Total participants 206 |           |          |      |
| Niv_3 mg/kg            | Any grade | Grade ≥3 |      |
| AE                     | n         | %        | n %  |
| Fatigue                | 41        | 20       | 0 0  |
| Pruritus               | 35        | 17       | 1 <1 |
| Nausea                 | 34        | 17       | 0 0  |
| Diarrhea               | 33        | 16       | 2 1  |
| Rash                   | 31        | 15       | 1 <1 |
| Constipation           | 22        | 11       | 0 0  |
| Vitiligo               | 22        | 11       | 0 0  |
| Asthenia               | 21        | 10       | 0 0  |
| Vomiting               | 13        | 6        | 1 <1 |
| Neutropenia            | 0         | 0        | 0 0  |
| Thrombocytopenia       | 0         | 0        | 0 0  |

observed in 10% or more of patients  
Robert et al., NEJM, 2015

| CheckMate 227           |           | advanced NSCLC |      |
|-------------------------|-----------|----------------|------|
| Total participants 576  |           |                |      |
| Niv_3 mg/kg+ipi 1 mg/kg | Any grade | Grade ≥3       |      |
| AE                      | n         | %              | n %  |
| Diarrhea                | 98        | 17             | 10 2 |
| Rash                    | 98        | 17             | 9 2  |
| Fatigue                 | 83        | 14             | 10 2 |
| Pruritus                | 82        | 14             | 3 <1 |
| Dec. appetite           | 76        | 13             | 4 <1 |
| Asthenia                | 59        | 10             | 8 1  |
| Nausea                  | 57        | 10             | 3 <1 |
| Vomiting                | 28        | 5              | 2 <1 |
| Constipation            | 26        | 5              | 0 0  |
| Anemia                  | 22        | 4              | 8 1  |
| Neutropenia             | 1         | <1             | 0 0  |

observed in 15% or more of patients  
Hellmann et al., NEJM, 2019

| CheckMate 153           |           | advanced NSCLC |      |
|-------------------------|-----------|----------------|------|
| Total participants 1426 |           |                |      |
| Niv_3 mg/kg             | Any grade | Grade ≥3       |      |
| AE                      | n         | %              | n %  |
| Fatigue                 | 296       | 21             | 34 2 |
| Diarrhea                | 151       | 11             | 13 1 |
| Nausea                  | 128       | 9              | 3 <1 |
| Hypothyroidism          | 115       | 8              | 1 <1 |
| Dec. appetite           | 110       | 8              | 2 <1 |
| Arthralgia              | 76        | 5              | 2 <1 |
| Rash                    | 69        | 5              | 4 <1 |
| Asthenia                | 64        | 4              | 3 <1 |
| Pruritus                | 64        | 4              | 3 <1 |
| Inc. TSH                | 29        | 2              | 1 <1 |

observed in 5% or more of patients  
Spigel et al., J Thor Oncology, 2019

| KEYNOTE-006                    |           | melanoma |                  |           |          |                  |           |          |  |
|--------------------------------|-----------|----------|------------------|-----------|----------|------------------|-----------|----------|--|
| Total participants 256 278 277 |           |          |                  |           |          |                  |           |          |  |
| Ipi 3 mg/kg                    | Any grade | Grade ≥3 | Pem 10 mg/kg Q2W | Any grade | Grade ≥3 | Pem 10 mg/kg Q3W | Any grade | Grade ≥3 |  |
| AE                             | n         | %        | AE               | n         | %        | AE               | n         | %        |  |
| Pruritus                       | 65        | 25       | Fatigue          | 58        | 21       | Fatigue          | 53        | 19       |  |
| Diarrhea                       | 58        | 23       | Diarrhea         | 47        | 17       | Diarrhea         | 40        | 14       |  |
| Fatigue                        | 39        | 15       | Rash             | 41        | 15       | Pruritus         | 39        | 14       |  |
| Rash                           | 37        | 14       | Pruritus         | 40        | 14       | Rash             | 37        | 13       |  |
| Nausea                         | 22        | 9        | Asthenia         | 32        | 12       | Arthralgia       | 32        | 12       |  |
| Colitis                        | 21        | 8        | Hypothyroidism   | 28        | 10       | Nausea           | 31        | 11       |  |
| Asthenia                       | 16        | 6        | Nausea           | 28        | 10       | Asthenia         | 31        | 11       |  |
| Arthralgia                     | 13        | 5        | Arthralgia       | 26        | 9        | Vitiligo         | 31        | 11       |  |
| Hypothyroidism                 | 6         | 2        | Vitiligo         | 25        | 9        | Hypothyroidism   | 24        | 9        |  |
| Hypophysitis                   | 6         | 2        | Hyperthyroidism  | 18        | 6        | Colitis          | 10        | 4        |  |
| Hypothyroidism                 | 5         | 2        | Colitis          | 5         | 2        | Hyperthyroidism  | 9         | 3        |  |
| Vitiligo                       | 4         | 2        | Hepatitis        | 3         | 1        | Hepatitis        | 5         | 2        |  |
| Hepatitis                      | 3         | 1        | Hypophysitis     | 1         | <1       | Pneumonitis      | 5         | 2        |  |
| Myositis                       | 1         | <1       | Pneumonitis      | 1         | <1       | Uveitis          | 3         | 1        |  |
| Nephritis                      | 1         | <1       | Type 1 diabetes  | 1         | <1       | Hypophysitis     | 2         | <1       |  |
| Pneumonitis                    | 1         | <1       | Uveitis          | 1         | <1       | Myositis         | 2         | <1       |  |
| Type 1 diabetes                | 0         | 0        | Myositis         | 0         | 0        | Nephritis        | 1         | <1       |  |
| Uveitis                        | 0         | 0        | Nephritis        | 0         | 0        | Type 1 diabetes  | 1         | <1       |  |

observed in 10% or more of patients  
Robert et al., NEJM, 2015

| OAK                    |           | NSCLC    |      |
|------------------------|-----------|----------|------|
| Total participants 609 |           |          |      |
| Atez 1200 mg           | Any grade | Grade ≥3 |      |
| AE                     | n         | %        | n %  |
| Fatigue                | 163       | 27.0     | 17 3 |
| Dec. appetite          | 143       | 24.0     | 2 <1 |
| Cough                  | 141       | 23.0     | 2 <1 |
| Dyspnea                | 118       | 19.0     | 15 2 |
| Asthenia               | 116       | 19.0     | 8 1  |
| Nausea                 | 108       | 18.0     | 4 <1 |
| Pyrexia                | 108       | 18.0     | 1 <1 |
| Constipation           | 107       | 18.0     | 2 <1 |
| Diarrhea               | 94        | 15.0     | 4 <1 |
| Vomiting               | 74        | 12.0     | 2 <1 |
| Arthralgia             | 73        | 12.0     | 3 <1 |
| Anemia                 | 70        | 11.0     | 14 2 |
| Back pain              | 67        | 11.0     | 7 1  |
| Muskuloskeletal pain   | 64        | 10.0     | 4 <1 |
| Peripheral edema       | 54        | 9.0      | 1 <1 |
| Myalgia                | 39        | 6.0      | 1 <1 |
| Peripheral neuropathy  | 24        | 4.0      | 0 0  |
| Stomatitis             | 19        | 3.0      | 1 <1 |
| Dysgeusia              | 18        | 3.0      | 0 0  |
| Neutropenia            | 10        | 2.0      | 3 <1 |
| Alopecia               | 3         | <1       | 0 0  |
| Febrile neutropenia    | 1         | <1       | 1 <1 |

observed in 10% or more of patients  
Rittmeyer et al., Lancet, 2017

| EORTC-18071            |            | melanoma |       |
|------------------------|------------|----------|-------|
| Total participants 471 |            |          |       |
| Ipi 10 mg/kg           | Any grade* | Grade ≥3 |       |
| AE                     | n          | %        | n %   |
| Diarrhea               | 231        | 49       | 46 10 |
| Pruritus               | 203        | 43       | 11 2  |
| Fatigue                | 189        | 40       | 10 2  |
| Rash                   | 185        | 39       | 6 1   |
| Headache               | 152        | 32       | 4 <1  |
| Weight loss            | 147        | 31       | 2 <1  |
| Nausea                 | 116        | 25       | 1 <1  |
| ALT inc.               | 102        | 22       | 25 5  |
| Liver function inc.    | 93         | 20       | 25 5  |
| Hypophysitis           | 88         | 19       | 25 5  |
| Pyrexia                | 82         | 17       | 5 1   |
| AST inc.               | 78         | 17       | 20 4  |
| Colitis                | 75         | 16       | 36 8  |
| Weight inc.            | 69         | 15       | 1 <1  |
| Cough                  | 68         | 14       | 0 0   |
| Abdominal pain         | 66         | 14       | 2 <1  |
| Dec. appetite          | 65         | 14       | 1 <1  |
| Vomiting               | 59         | 13       | 2 <1  |
| Hypothyroidism         | 42         | 9        | 1 <1  |
| Neurologic/neuropathy  | 21         | 4        | 9 2   |
| Colitis ulcerative     | 1          | <1       | 1 <1  |

observed in 10% or more of patients  
Eggermont et al., Lancet Oncol, 2015

| PACIFIC                         |           | NSCLC    |        |
|---------------------------------|-----------|----------|--------|
| Total participants 475          |           |          |        |
| Durva 10 mg/kg                  | Any grade | Grade ≥3 |        |
| AE                              | n         | %        | n %    |
| Cough                           | 168       | 35.0     | 2 <1   |
| Pneumonitis or radiation pneum. | 161       | 34       | 16 3.0 |
| Fatigue                         | 113       | 24       | 1 <1   |
| Dyspnea                         | 106       | 22       | 7 2    |
| Diarrhea                        | 87        | 18       | 3 <1   |
| Pyrexia                         | 70        | 15       | 1 <1   |
| Dec. appetite                   | 68        | 14       | 1 <1   |
| Nausea                          | 66        | 14       | 0 0    |
| Pneumonia                       | 62        | 13       | 21 4   |
| Arthralgia                      | 59        | 12       | 0 0    |
| Pruritus                        | 58        | 12       | 0 0    |
| Rash                            | 58        | 12       | 1 <1   |
| Upper resp. tract infection     | 58        | 12       | 1 <1   |
| Constipation                    | 56        | 12       | 1 <1   |
| Hypothyroidism                  | 55        | 12       | 1 <1   |
| Headache                        | 52        | 11       | 1 <1   |
| Asthenia                        | 51        | 11       | 3 <1   |
| Back pain                       | 50        | 11       | 1 <1   |
| Muskuloskeletal pain            | 39        | 8        | 3 <1   |
| Anemia                          | 36        | 8        | 14 3   |

observed in 10% or more of patients  
Antonia et al., NEJM, 2017

| CheckMate 067                  |           | melanoma |                |           |          |               |           |          |  |
|--------------------------------|-----------|----------|----------------|-----------|----------|---------------|-----------|----------|--|
| Total participants 311 313 313 |           |          |                |           |          |               |           |          |  |
| Ipi 3 mg/kg                    | Any grade | Grade ≥3 | Niv + Ipi      | Any grade | Grade ≥3 | Niv 3 mg/kg   | Any grade | Grade ≥3 |  |
| AE                             | n         | %        | AE             | n         | %        | AE            | n         | %        |  |
| Pruritus                       | 110       | 35       | Diarrhea       | 138       | 44       | Fatigue       | 107       | 34       |  |
| Diarrhea                       | 103       | 33       | Rash           | 126       | 40       | Rash          | 81        | 26       |  |
| Rash                           | 102       | 33       | Fatigue        | 110       | 35       | Diarrhea      | 60        | 19       |  |
| Fatigue                        | 87        | 28       | Pruritus       | 104       | 33       | Pruritus      | 59        | 19       |  |
| Nausea                         | 50        | 16       | Nausea         | 81        | 26       | Nausea        | 41        | 13       |  |
| Dec. appetite                  | 39        | 13       | Pyrexia        | 58        | 19       | Dec. appetite | 34        | 11       |  |
| Colitis                        | 36        | 12       | Dec. appetite  | 56        | 18       | Vomiting      | 27        | 9        |  |
| Headache                       | 24        | 8        | ALT inc.       | 55        | 18       | Arthralgia    | 24        | 8        |  |
| Vomiting                       | 23        | 7        | AST inc.       | 48        | 15       | Headache      | 23        | 7        |  |
| Pyrexia                        | 21        | 7        | vomiting       | 48        | 15       | Vomiting      | 20        | 6        |  |
| Arthralgia                     | 19        | 6        | Hypothyroidism | 47        | 15       | Pyrexia       | 18        | 6        |  |
| Dyspnea                        | 13        | 4        | Colitis        | 37        | 12       | Dyspnea       | 14        | 4        |  |
| Hypothyroidism                 | 13        | 4        | Arthralgia     | 33        | 11       | ALT inc.      | 12        | 4        |  |
| ALT inc.                       | 12        | 4        | Dyspnea        | 32        | 10       | AST inc.      | 12        | 4        |  |
| AST inc.                       | 11        | 4        | Headache       | 32        | 10       | Colitis       | 4         | 1        |  |

observed in 10% or more of patients  
Larkin et al., NEJM, 2015

\* "Any grade" was calculated adding all grades

| MDX010-20 melanoma     |           |    |           |    |
|------------------------|-----------|----|-----------|----|
| Total participants 131 |           |    |           |    |
| AE                     | Any grade |    | Grade ≥3* |    |
|                        | n         | %  | n         | %  |
| Fatigue                | 55        | 42 | 9         | 7  |
| Nausea                 | 46        | 35 | 3         | 2  |
| Diarrhea               | 43        | 33 | 7         | 5  |
| Dec. appetite          | 35        | 27 | 2         | 2  |
| Pruritus               | 32        | 24 | 0         | 0  |
| Vomiting               | 31        | 24 | 3         | 2  |
| Constipation           | 27        | 21 | 3         | 2  |
| Rash                   | 25        | 19 | 1         | <1 |
| Cough                  | 21        | 16 | 0         | 0  |
| Abdominal pain         | 20        | 15 | 2         | 2  |
| Dyspnea                | 19        | 15 | 5         | 4  |
| Headache               | 19        | 15 | 3         | 2  |
| Pyrexia                | 16        | 12 | 0         | 0  |
| Anemia                 | 15        | 11 | 4         | 3  |
| Colitis                | 10        | 8  | 7         | 5  |
| Hypopituitarism        | 3         | 2  | 2         | 2  |
| Vitiligo               | 3         | 2  | 0         | 0  |
| Adrenal insuf.         | 2         | 2  | 0         | 0  |
| ALT inc.               | 2         | 2  | 0         | 0  |
| Hypophytosis           | 2         | 2  | 2         | 2  |
| Hypothyroidism         | 2         | 2  | 0         | 0  |
| AST inc.               | 1         | <1 | 0         | 0  |
| Hepatitis              | 1         | <1 | 0         | 0  |

observed in 15% or more of patients  
Hodi et al., NEJM, 2010

| KEYNOTE-087 Hodgkin lymphoma |            |    |          |    |
|------------------------------|------------|----|----------|----|
| Total participants 210       |            |    |          |    |
| AE                           | Any grade* |    | Grade ≥3 |    |
|                              | n          | %  | n        | %  |
| Hypothyroidism               | 26         | 12 | 1        | <1 |
| Pyrexia                      | 22         | 10 | 1        | <1 |
| Fatigue                      | 19         | 9  | 1        | <1 |
| Rash                         | 16         | 8  | 0        | 0  |
| Diarrhea                     | 15         | 7  | 2        | 1  |
| Headache                     | 13         | 6  | 0        | 0  |
| Cough                        | 12         | 6  | 1        | <1 |
| Nausea                       | 12         | 6  | 0        | 0  |
| Neutropenia                  | 11         | 5  | 5        | 2  |
| Arthralgia                   | 9          | 4  | 1        | <1 |
| Muscle spasms                | 8          | 4  | 0        | 0  |
| Pruritus                     | 8          | 4  | 0        | 0  |
| Vomiting                     | 8          | 4  | 0        | 0  |
| Dyspnea                      | 7          | 3  | 2        | 1  |
| Upper resp. infection        | 7          | 3  | 0        | 0  |
| Constipation                 | 6          | 3  | 0        | 0  |
| Chills                       | 5          | 2  | 0        | 0  |
| Myalgia                      | 5          | 2  | 0        | 0  |
| Back pain                    | 4          | 2  | 0        | 0  |
| Asthenia                     | 3          | 1  | 0        | 0  |
| Nasal congestion             | 3          | 1  | 0        | 0  |
| Bronchitis                   | 2          | 1  | 0        | 0  |
| Insomnia                     | 2          | 1  | 0        | 0  |
| Nasopharyngitis              | 2          | 1  | 0        | 0  |
| Anemia                       | 1          | 0  | 0        | 0  |
| Oropharyngeal pain           | 1          | 0  | 0        | 0  |
| Sinusitis                    | 1          | 0  | 0        | 0  |

observed in 5% or more of patients  
Chen et al., JCO, 2017

| Javelin Merkel 200 Merkel cell carcinoma |           |    |          |   |
|------------------------------------------|-----------|----|----------|---|
| Total participants 39                    |           |    |          |   |
| AE                                       | Any grade |    | Grade ≥3 |   |
|                                          | n         | %  | n        | % |
| Fatigue                                  | 9         | 23 | 0        | 0 |
| Infusion-related reaction                | 9         | 23 | 1        | 3 |
| Asthenia                                 | 3         | 8  | 0        | 0 |
| Inc. Lipase                              | 3         | 8  | 1        | 3 |
| Inc. ALT                                 | 3         | 8  | 1        | 3 |
| Arthralgia                               | 2         | 5  | 0        | 0 |
| Inc. CPK                                 | 2         | 5  | 1        | 3 |
| Chills                                   | 2         | 5  | 0        | 0 |
| Diarrhea                                 | 2         | 5  | 0        | 0 |
| Dry mouth                                | 2         | 5  | 0        | 0 |
| Dyspnea                                  | 2         | 5  | 0        | 0 |
| Eosinophilia                             | 2         | 5  | 0        | 0 |
| Nausea                                   | 2         | 5  | 0        | 0 |
| Pruritus                                 | 2         | 5  | 0        | 0 |
| Pyrexia                                  | 2         | 5  | 0        | 0 |
| Rash maculo-papular                      | 2         | 5  | 0        | 0 |
| Chills                                   | 2         | 5  | 0        | 0 |
| Autoimmune nephritis                     | 1         | 3  | 1        | 3 |
| Cholangitis                              | 1         | 3  | 1        | 3 |
| Inc. AST                                 | 1         | 3  | 1        | 3 |
| Gait disturbance                         | 1         | 3  | 1        | 3 |
| Paraneoplastic encephalomyelit           | 1         | 3  | 1        | 3 |
| Polyneuropathy                           | 1         | 3  | 1        | 3 |
| Paraneoplastic syndrome                  | 1         | 3  | 1        | 3 |
| Inc. Troponin                            | 1         | 3  | 1        | 3 |

observed in 5% or more of patients  
D'Angelo et al., JAMA Oncology, 2018

| KEYNOTE-024 NSCLC      |           |    |          |    |
|------------------------|-----------|----|----------|----|
| Total participants 154 |           |    |          |    |
| AE                     | Any grade |    | Grade ≥3 |    |
|                        | n         | %  | n        | %  |
| Diarrhea               | 22        | 14 | 6        | 4  |
| Fatigue                | 16        | 10 | 2        | 1  |
| Pyrexia                | 16        | 10 | 0        | 0  |
| Nausea                 | 15        | 10 | 0        | 0  |
| Dec. appetite          | 14        | 9  | 0        | 0  |
| Hypothyroidism         | 14        | 9  | 0        | 0  |
| Hyperthyroidism        | 12        | 8  | 0        | 0  |
| Pneumonitis            | 9         | 6  | 4        | 3  |
| Anemia                 | 8         | 5  | 3        | 2  |
| Infusion reaction      | 7         | 5  | 0        | 0  |
| Constipation           | 6         | 4  | 0        | 0  |
| Severe skin reactions  | 6         | 4  | 6        | 4  |
| Stomatitis             | 4         | 3  | 0        | 0  |
| Thyroiditis            | 4         | 3  | 0        | 0  |
| Vomiting               | 4         | 3  | 1        | <1 |
| Colitis                | 3         | 2  | 2        | 1  |
| Inc. blood creatinine  | 3         | 2  | 0        | 0  |
| Myositis               | 3         | 2  | 0        | 0  |
| Dysgeusia              | 1         | <1 | 0        | 0  |
| Hypophytosis           | 1         | <1 | 1        | <1 |
| Leukopenia             | 1         | <1 | 0        | 0  |
| Nephritis              | 1         | <1 | 1        | <1 |
| Neutropenia            | 1         | <1 | 0        | 0  |
| Pancreatitis           | 1         | <1 | 1        | <1 |
| Type 1 diabetes        | 1         | <1 | 1        | <1 |
| Platelet count dec.    | 0         | 0  | 0        | 0  |
| Thrombocytopenia       | 0         | 0  | 0        | 0  |

observed in 10% or more of patients  
Reck et al., NEJM, 2016

| Study 1108 urothelial carcinoma |           |    |          |    |
|---------------------------------|-----------|----|----------|----|
| Total participants 191          |           |    |          |    |
| AE                              | Any grade |    | Grade ≥3 |    |
|                                 | n         | %  | n        | %  |
| Fatigue                         | 37        | 19 | 0        | 0  |
| Dec. appetite                   | 18        | 9  | 0        | 0  |
| Diarrhea                        | 16        | 8  | 1        | <1 |
| Rash                            | 14        | 7  | 0        | 0  |
| Nausea                          | 13        | 7  | 0        | 0  |
| Arthralgia                      | 11        | 6  | 0        | 0  |
| Pyrexia                         | 11        | 6  | 0        | 0  |
| Pruritus                        | 10        | 5  | 0        | 0  |
| Hypothyroidism                  | 9         | 5  | 0        | 0  |
| Inc. ALT                        | 8         | 4  | 2        | 1  |
| Inc. AST                        | 6         | 3  | 3        | 2  |
| Vomiting                        | 6         | 3  | 0        | 0  |
| Inc. GGT                        | 6         | 3  | 2        | 1  |
| Dyspnea                         | 4         | 2  | 0        | 0  |
| Inc. blood ALP                  | 4         | 2  | 1        | <1 |
| Thrombocytopenia                | 4         | 2  | 0        | 0  |
| Hypertension                    | 3         | 2  | 2        | 1  |
| Anemia                          | 2         | 1  | 1        | <1 |
| Ras maculo-papular              | 2         | 1  | 1        | <1 |
| Infusion-related reaction       | 2         | 1  | 1        | <1 |
| Inc transaminases               | 2         | 1  | 1        | <1 |
| Autoimmune hepatitis            | 2         | 1  | 1        | <1 |
| Tumor flare                     | 2         | 1  | 1        | <1 |
| Acute kidney injury             | 1         | <1 | 1        | <1 |
| Atrial fibrillation             | 1         | <1 | 1        | <1 |
| Hyponatremia                    | 1         | <1 | 0        | 0  |
| Colitis                         | 1         | <1 | 0        | 0  |
| Dec.weight                      | 1         | <1 | 0        | 0  |
| Leukopenia                      | 1         | <1 | 0        | 0  |

observed in 5% or more of patients  
Powles et al., JAMA Oncology, 2017

| KEYNOTE-010 advanced NSCLC |           |    |                        |    |          |    |
|----------------------------|-----------|----|------------------------|----|----------|----|
| Total participants 339     |           |    | Total participants 343 |    |          |    |
| AE                         | Any grade |    | Any grade              |    | Grade ≥3 |    |
|                            | n         | %  | n                      | %  | n        | %  |
| Dec. appetite              | 46        | 14 | 33                     | 10 | 1        | <1 |
| Fatigue                    | 46        | 14 | 49                     | 14 | 6        | 2  |
| Nausea                     | 37        | 11 | 31                     | 9  | 2        | 1  |
| Rash                       | 29        | 9  | 44                     | 13 | 1        | <1 |
| Hypothyroidism             | 28        | 8  | 28                     | 8  | 0        | 0  |
| Diarrhea                   | 24        | 7  | 22                     | 6  | 0        | 0  |
| Asthenia                   | 20        | 6  | 20                     | 6  | 1        | <1 |
| Pneumonitis                | 16        | 5  | 19                     | 6  | 2        | 1  |
| Stomatitis                 | 13        | 4  | 15                     | 4  | 7        | 2  |
| Hyperthyroidism            | 12        | 4  | 14                     | 4  | 1        | <1 |
| Anemia                     | 10        | 3  | 7                      | 2  | 6        | 2  |
| Colitis                    | 4         | 1  | 7                      | 2  | 1        | <1 |
| Severe skin reaction       | 4         | 1  | 3                      | 1  | 1        | <1 |
| Pancreatitis               | 3         | 1  | 2                      | 1  | 1        | <1 |
| Alopecia                   | 3         | 1  | 2                      | 1  | 1        | <1 |
| Adrenal insufficiency      | 2         | 1  | 2                      | 1  | 0        | 0  |
| Myositis                   | 2         | 1  | 2                      | 1  | 0        | 0  |
| Thyroiditis                | 2         | 1  | 1                      | <1 | 1        | <1 |
| Autoimmune hepatitis       | 1         | <1 | 1                      | <1 | 0        | 0  |
| Hypophytosis               | 1         | <1 | 1                      | <1 | 0        | 0  |
| Type 1 diabetes            | 1         | <1 | 0                      | 0  | 0        | 0  |
| Neutropenia                | 1         | <1 | 0                      | 0  | 0        | 0  |

observed in 10% or more of patients  
Herbst et al., Lancet, 2016

| KEYNOTE-002 melanoma   |            |    |                        |    |          |    |
|------------------------|------------|----|------------------------|----|----------|----|
| Total participants 178 |            |    | Total participants 178 |    |          |    |
| AE                     | Any grade* |    | Any grade*             |    | Grade ≥3 |    |
|                        | n          | %  | n                      | %  | n        | %  |
| Fatigue                | 40         | 22 | 40                     | 22 | 2        | 1  |
| Pruritus               | 37         | 21 | 37                     | 21 | 0        | 0  |
| Rash                   | 21         | 12 | 21                     | 12 | 0        | 0  |
| Diarrhea               | 15         | 8  | 15                     | 8  | 0        | 0  |
| Arthralgia             | 13         | 7  | 13                     | 7  | 1        | <1 |
| Vitiligo               | 10         | 6  | 10                     | 6  | 0        | 0  |
| Dry skin               | 9          | 5  | 9                      | 5  | 0        | 0  |
| Hypothyroidism         | 9          | 5  | 9                      | 5  | 0        | 0  |
| Myalgia                | 9          | 5  | 9                      | 5  | 2        | 1  |
| Nausea                 | 8          | 4  | 8                      | 4  | 0        | 0  |
| Dec. appetite          | 8          | 4  | 8                      | 4  | 0        | 0  |
| Asthenia               | 6          | 3  | 6                      | 3  | 1        | <1 |
| Alopecia               | 5          | 3  | 5                      | 3  | 0        | 0  |
| Anemia                 | 5          | 3  | 5                      | 3  | 1        | <1 |
| Constipation           | 5          | 3  | 5                      | 3  | 0        | 0  |
| Maculopapular rash     | 5          | 3  | 5                      | 3  | 1        | <1 |
| Neurologic/neuropathy  | 2          | 1  | 2                      | 1  | 0        | 0  |
| Thrombocytopenia       | 2          | 1  | 2                      | 1  | 0        | 0  |
| Vomiting               | 2          | 1  | 2                      | 1  | 1        | <1 |
| Neutropenia            | 1          | <1 | 1                      | <1 | 0        | 0  |
| Paraesthesia           | 1          | <1 | 1                      | <1 | 0        | 0  |
| Leukopenia             | 0          | 0  | 0                      | 0  | 0        | 0  |
| Platelet count dec.    | 0          | 0  | 0                      | 0  | 0        | 0  |
| Neurologic/neuropathy  | 0          | 0  | 0                      | 0  | 0        | 0  |

observed in 5% or more of patients  
Ribas et al., Lancet Oncol, 2015

| CheckMate 358 Cervical/Vaginal/Vulvar cancer |                    |          |                          |          |          |    |
|----------------------------------------------|--------------------|----------|--------------------------|----------|----------|----|
| AE                                           | Cervical cancer=19 |          | Vaginal/Vulvar cancers=5 |          | Grade ≥3 |    |
|                                              | ny grade           | Grade ≥3 | Any grade                | Grade ≥3 |          |    |
| Diarrhea                                     | 4                  | 21       | 1                        | 5        | 0        | 0  |
| Fatigue                                      | 3                  | 16       | 0                        | 0        | 1        | 20 |
| Pneumonitis                                  | 2                  | 11       | 1                        | 5        | 0        | 0  |
| Abdominal pain                               | 2                  | 11       | 0                        | 0        | 1        | 20 |
| Stomatitis                                   | 2                  | 11       | 0                        | 0        | 0        | 0  |
| Dry eye                                      | 2                  | 11       | 0                        | 0        | 0        | 0  |
| Arthralgia                                   | 2                  | 11       | 0                        | 0        | 1        | 20 |
| Dec.appetite                                 | 1                  | 5        | 0                        | 0        | 2        | 40 |

observed in 10% or more of patients  
Naumann et al., JCO, 2019



## REFERENCES

1. Chen R., Zinzani P.L., Fanale M.A., Armand P., Johnson N.A., Brice P., *et al.* (2017) Phase II Study of the Efficacy and Safety of Pembrolizumab for Relapsed/Refractory Classic Hodgkin Lymphoma. *J Clin Oncol* 35(19):2125-2132.
2. Motzer R.J., Escudier B., McDermott D.F., George S., Hammers H.J., Srinivas S., *et al.* (2015) Nivolumab versus Everolimus in Advanced Renal-Cell Carcinoma. *N Engl J Med* 373(19):1803-1813.
3. Larkin J., Chiarion-Sileni V., Gonzalez R., Grob J.J., Cowey C.L., Lao C.D., *et al.* (2015) Combined Nivolumab and Ipilimumab or Monotherapy in Untreated Melanoma. *N Engl J Med* 373(1):23-34.
4. Ferris R.L., Blumenschein G., Jr., Fayette J., Guigay J., Colevas A.D., Licitra L., *et al.* (2016) Nivolumab for Recurrent Squamous-Cell Carcinoma of the Head and Neck. *N Engl J Med* 375(19):1856-1867.
5. Eggermont A.M., Chiarion-Sileni V., Grob J.J., Dummer R., Wolchok J.D., Schmidt H., *et al.* (2015) Adjuvant ipilimumab versus placebo after complete resection of high-risk stage III melanoma (EORTC 18071): a randomised, double-blind, phase 3 trial. *Lancet Oncol* 16(5):522-530.
6. Ribas A., Puzanov I., Dummer R., Schadendorf D., Hamid O., Robert C., *et al.* (2015) Pembrolizumab versus investigator-choice chemotherapy for ipilimumab-refractory melanoma (KEYNOTE-002): a randomised, controlled, phase 2 trial. *Lancet Oncol* 16(8):908-918.
7. Hodi F.S., O'Day S.J., McDermott D.F., Weber R.W., Sosman J.A., Haanen J.B., *et al.* (2010) Improved survival with ipilimumab in patients with metastatic melanoma. *N Engl J Med* 363(8):711-723.
8. Robert C., Schachter J., Long G.V., Arance A., Grob J.J., Mortier L., *et al.* (2015) Pembrolizumab versus Ipilimumab in Advanced Melanoma. *N Engl J Med* 372(26):2521-2532.
9. Reck M., Rodriguez-Abreu D., Robinson A.G., Hui R., Csoszi T., Fulop A., *et al.* (2016) Pembrolizumab versus Chemotherapy for PD-L1-Positive Non-Small-Cell Lung Cancer. *N Engl J Med* 375(19):1823-1833.
10. Robert C., Long G.V., Brady B., Dutriaux C., Maio M., Mortier L., *et al.* (2015) Nivolumab in previously untreated melanoma without BRAF mutation. *N Engl J Med* 372(4):320-330.
11. Herbst R.S., Baas P., Kim D.W., Felip E., Perez-Gracia J.L., Han J.Y., *et al.* (2016) Pembrolizumab versus docetaxel for previously treated, PD-L1-positive, advanced non-small-cell lung cancer (KEYNOTE-010): a randomised controlled trial. *Lancet* 387(10027):1540-1550.
12. Rittmeyer A., Barlesi F., Waterkamp D., Park K., Ciardiello F., von Pawel J., *et al.* (2017) Atezolizumab versus docetaxel in patients with previously treated non-small-cell lung cancer (OAK): a phase 3, open-label, multicentre randomised controlled trial. *Lancet* 389(10066):255-265.
13. Antonia S.J., Villegas A., Daniel D., Vicente D., Murakami S., Hui R., *et al.* (2017) Durvalumab after Chemoradiotherapy in Stage III Non-Small-Cell Lung Cancer. *N Engl J Med* 377(20):1919-1929.
14. D'Angelo S.P., Russell J., Lebbe C., Chmielowski B., Gambichler T., Grob J.J., *et al.* (2018) Efficacy and Safety of First-line Avelumab Treatment in Patients With Stage IV

- Metastatic Merkel Cell Carcinoma: A Preplanned Interim Analysis of a Clinical Trial. *JAMA Oncol* 4(9):e180077.
15. Horn L., Mansfield A.S., Szczesna A., Havel L., Krzakowski M., Hochmair M.J., *et al.* (2018) First-Line Atezolizumab plus Chemotherapy in Extensive-Stage Small-Cell Lung Cancer. *N Engl J Med* 379(23):2220-2229.
  16. Paz-Ares L., Luft A., Vicente D., Tafreshi A., Gumus M., Mazieres J., *et al.* (2018) Pembrolizumab plus Chemotherapy for Squamous Non-Small-Cell Lung Cancer. *N Engl J Med* 379(21):2040-2051.
  17. Naumann R.W., Hollebecque A., Meyer T., Devlin M.J., Oaknin A., Kerger J., *et al.* (2019) Safety and Efficacy of Nivolumab Monotherapy in Recurrent or Metastatic Cervical, Vaginal, or Vulvar Carcinoma: Results From the Phase I/II CheckMate 358 Trial. *J Clin Oncol* 37(31):2825-2834.
  18. Powles T., O'Donnell P.H., Massard C., Arkenau H.T., Friedlander T.W., Hoimes C.J., *et al.* (2017) Efficacy and Safety of Durvalumab in Locally Advanced or Metastatic Urothelial Carcinoma: Updated Results From a Phase 1/2 Open-label Study. *JAMA Oncol* 3(9):e172411.
  19. Brahmer J., Reckamp K.L., Baas P., Crino L., Eberhardt W.E., Poddubskaya E., *et al.* (2015) Nivolumab versus Docetaxel in Advanced Squamous-Cell Non-Small-Cell Lung Cancer. *N Engl J Med* 373(2):123-135.
  20. Hellmann M.D., Paz-Ares L., Bernabe Caro R., Zurawski B., Kim S.W., Carcereny Costa E., *et al.* (2019) Nivolumab plus Ipilimumab in Advanced Non-Small-Cell Lung Cancer. *N Engl J Med* 381(21):2020-2031.
  21. Spigel D.R., McCleod M., Jotte R.M., Einhorn L., Horn L., Waterhouse D.M., *et al.* (2019) Safety, Efficacy, and Patient-Reported Health-Related Quality of Life and Symptom Burden with Nivolumab in Patients with Advanced Non-Small Cell Lung Cancer, Including Patients Aged 70 Years or Older or with Poor Performance Status (CheckMate 153). *J Thorac Oncol* 14(9):1628-1639.
  22. Bellmunt J., de Wit R., Vaughn D.J., Fradet Y., Lee J.L., Fong L., *et al.* (2017) Pembrolizumab as Second-Line Therapy for Advanced Urothelial Carcinoma. *N Engl J Med* 376(11):1015-1026.
  23. McGregor B.A., McKay R.R., Braun D.A., Werner L., Gray K., Flaifel A., *et al.* (2020) Results of a Multicenter Phase II Study of Atezolizumab and Bevacizumab for Patients With Metastatic Renal Cell Carcinoma With Variant Histology and/or Sarcomatoid Features. *J Clin Oncol* 38(1):63-70.
  24. Bauml J.M., Mick R., Ciunci C., Aggarwal C., Davis C., Evans T., *et al.* (2019) Pembrolizumab After Completion of Locally Ablative Therapy for Oligometastatic Non-Small Cell Lung Cancer: A Phase 2 Trial. *JAMA Oncol*.
  25. Motzer R.J., Tannir N.M., McDermott D.F., Aren Frontera O., Melichar B., Choueiri T.K., *et al.* (2018) Nivolumab plus Ipilimumab versus Sunitinib in Advanced Renal-Cell Carcinoma. *N Engl J Med* 378(14):1277-1290.
  26. Borghaei H., Paz-Ares L., Horn L., Spigel D.R., Steins M., Ready N.E., *et al.* (2015) Nivolumab versus Docetaxel in Advanced Nonsquamous Non-Small-Cell Lung Cancer. *N Engl J Med* 373(17):1627-1639.
